# Supplementary material for: Reaction scope and mechanistic insights of nickel-catalyzed migratory Suzuki–Miyaura cross-coupling
Source: PubMed Central journal article supplement (PMC6972863; doi:10.1038/s41467-019-14016-1), 2020-01-21
Supplement: 41467_2019_14016_MOESM3_ESM.pdf [file 41467_2019_14016_MOESM3_ESM.pdf]

## Absolute Calculation Energies, Enthalpies, and Free Energies

| Geometry    | $E_{(\text{elec-B3LYP})}^1$ | $E_{(\text{solv, M06})}^2$ | $G_{(\text{corr-B3LYP})}^3$ | $H_{(\text{corr-B3LYP})}^4$ | $IF^5$  |
|-------------|-----------------------------|----------------------------|-----------------------------|-----------------------------|---------|
| <b>CP1</b>  | -1569.483234                | -1568.856797               | 0.452682                    | 0.554803                    | -       |
| <b>1b</b>   | -2920.990064                | -2923.422866               | 0.138057                    | 0.187655                    | -       |
| <b>DMA</b>  | -287.824913                 | -287.725480                | 0.099007                    | 0.139646                    | -       |
| <b>CP2</b>  | -4490.509279                | -4492.316971               | 0.606354                    | 0.744306                    | -       |
| <b>TS1</b>  | -4490.497275                | -4492.295373               | 0.607924                    | 0.742141                    | -263.40 |
| <b>CP3</b>  | -3853.174246                | -3855.261833               | 0.330168                    | 0.418166                    | -       |
| <b>CP4</b>  | -349.514582                 | -349.326063                | 0.135681                    | 0.181003                    | -       |
| <b>CP5</b>  | -4202.704007                | -4204.614283               | 0.495404                    | 0.603862                    | -       |
| <b>CP6</b>  | -4202.647007                | -4204.555600               | 0.489559                    | 0.602909                    | -       |
| <b>TS2</b>  | -4202.625583                | -4204.539165               | 0.490122                    | 0.601051                    | -237.64 |
| <b>TS3</b>  | -4202.664914                | -4204.589476               | 0.493642                    | 0.598781                    | -259.60 |
| <b>CP7</b>  | -3853.728278                | -3855.819293               | 0.341584                    | 0.426924                    | -       |
| <b>CP8</b>  | -348.949838                 | -348.764192                | 0.128208                    | 0.171251                    | -       |
| <b>TS4</b>  | -4202.662977                | -4204.592031               | 0.491933                    | 0.598087                    | -610.85 |
| <b>CP9</b>  | -4202.693680                | -4204.610502               | 0.494461                    | 0.602287                    | -       |
| <b>TS5</b>  | -4202.674780                | -4204.596594               | 0.491626                    | 0.598117                    | -375.16 |
| <b>CP10</b> | -3853.728278                | -3855.819292               | 0.341582                    | 0.426925                    | -       |
| <b>CP11</b> | -348.960880                 | -348.773751                | 0.128064                    | 0.171291                    | -       |
| <b>TS6</b>  | -4202.678196                | -4204.600901               | 0.492157                    | 0.598531                    | -67.71  |
| <b>CP12</b> | -4202.702160                | -4204.616270               | 0.494974                    | 0.603381                    | -       |

---

|                          |              |              |           |          |         |
|--------------------------|--------------|--------------|-----------|----------|---------|
| <b>CP13</b>              | -4202.673833 | -4204.598073 | 0.494333  | 0.600298 | -       |
| <b>CP14</b>              | -4202.679481 | -4204.598768 | 0.494629  | 0.600182 | -       |
| <b>Br</b>                | -2571.464366 | -2574.182809 | -0.016176 | 0.002360 | -       |
| <b>CP15</b>              | -1631.080043 | -1630.41209  | 0.500985  | 0.600784 | -       |
| <b>TS7</b>               | -1631.055394 | -1630.390103 | 0.498526  | 0.597139 | -35.36  |
| <b>CP16</b>              | -1631.055263 | -1630.385955 | 0.497741  | 0.598762 | -       |
| <b>TS8</b>               | -1631.051404 | -1630.385682 | 0.497427  | 0.597293 | -131.22 |
| <b>CP17</b>              | -1631.076604 | -1630.412663 | 0.500054  | 0.600722 | -       |
| <b>TS9</b>               | -1631.059541 | -1630.391962 | 0.497267  | 0.597017 | -238.58 |
| <b>CP18</b>              | -1631.061307 | -1630.391935 | 0.497986  | 0.598597 | -       |
| <b>TS10</b>              | -1631.046434 | -1630.379885 | 0.499025  | 0.596838 | -132.14 |
| <b>CP19</b>              | -1631.085281 | -1630.419378 | 0.500523  | 0.600911 | -       |
| <b>CP20</b>              | -1067.402471 | -1067.063803 | 0.342352  | 0.436427 | -       |
| <b>CP21</b>              | -5270.132712 | -5271.704433 | 0.856528  | 1.041772 | -       |
| <b>TS11</b>              | -5270.126284 | -5271.694065 | 0.860218  | 1.040587 | -47.43  |
| <b>CP22</b>              | -5270.128607 | -5271.697400 | 0.862234  | 1.042014 | -       |
| <b>TS12</b>              | -5270.117356 | -5271.685259 | 0.859915  | 1.040685 | -76.19  |
| <b>CP23</b>              | -3154.746980 | -3157.150430 | 0.215482  | 0.289129 | -       |
| <b>CP24</b>              | -2115.356593 | -2114.522501 | 0.620923  | 0.751099 | -       |
| <b>TS13</b>              | -2115.319626 | -2114.500796 | 0.622715  | 0.749371 | -250.59 |
| <b>B(OH)<sub>3</sub></b> | -252.470851  | -252.474183  | 0.022275  | 0.053998 | -       |
| <b>CP25</b>              | -1862.876731 | -1862.057462 | 0.580517  | 0.695951 | -       |
| <b>TS14</b>              | -1862.843223 | -1862.033412 | 0.579111  | 0.693995 | -341.97 |

---

|                             |              |              |          |          |         |
|-----------------------------|--------------|--------------|----------|----------|---------|
| <b>3b</b>                   | -581.232331  | -580.926415  | 0.224341 | 0.281669 | -       |
| <b>TS15</b>                 | -2115.29099  | -2114.478157 | 0.621196 | 0.746748 | -77.97  |
| <b>CP26</b>                 | -2115.301967 | -2114.484665 | 0.622491 | 0.74828  | -       |
| <b>CP27</b>                 | -5270.137053 | -5271.711533 | 0.863018 | 1.042375 | -       |
| <b>TS16</b>                 | -5270.124853 | -5271.695483 | 0.861488 | 1.041143 | -25.34  |
| <b>CP28</b>                 | -5270.126897 | -5271.698386 | 0.859717 | 1.042089 | -       |
| <b>TS17</b>                 | -5270.115842 | -5271.689006 | 0.864254 | 1.041435 | -57.29  |
| <b>CP29</b>                 | -2115.360836 | -2114.529268 | 0.625378 | 0.751492 | -       |
| <b>TS18</b>                 | -2115.320451 | -2114.507901 | 0.625171 | 0.749632 | -255.34 |
| <b>CP30</b>                 | -1862.87121  | -1862.055982 | 0.582041 | 0.695807 | -       |
| <b>TS19</b>                 | -1862.832804 | -1862.031689 | 0.580329 | 0.693689 | -291.59 |
| <b>4b</b>                   | -581.227968  | -580.924387  | 0.225959 | 0.281422 | -       |
| <b>CP0</b>                  | -1281.618680 | -1281.094085 | 0.333678 | 0.413340 | -       |
| <b>CP1'</b>                 | -1857.306126 | -1856.584038 | 0.571035 | 0.696475 | -       |
| <b>Ph-B(OH)<sub>2</sub></b> | -408.242565  | -408.120427  | 0.092964 | 0.132733 | -       |
| <b>LiOH 3DMA</b>            | -946.933217  | -946.623846  | 0.347827 | 0.441744 | -       |

<sup>1</sup>The electronic energy calculated by B3LYP in gas phase. <sup>2</sup>The electronic energy calculated by M06 in DMA solvent. <sup>3</sup>The thermal correction to Gibbs free energy calculated by B3LYP in gas phase. <sup>4</sup>The thermal correction to enthalpy calculated by B3LYP in gas phase. <sup>5</sup>The B3LYP calculated imaginary frequencies for the transition states.

### B3LYP Geometries for All the Optimized Compounds and Transition States

|            |             |            |             |   |             |             |             |
|------------|-------------|------------|-------------|---|-------------|-------------|-------------|
| <b>CP1</b> |             |            |             | C | -1.71974700 | 1.88961700  | 0.29335700  |
| C          | 1.85770800  | 2.47877300 | -0.72458400 | C | -0.80621400 | -0.67992500 | -0.35459300 |
| C          | 0.56226400  | 2.81291500 | -0.30057400 | C | -2.17983900 | -0.48882400 | -0.04738600 |
| C          | -0.36769400 | 1.74458300 | -0.17283100 | C | -2.58919300 | 0.83770200  | 0.32222600  |
| C          | 0.07367600  | 0.43417700 | -0.50371500 | C | -3.02656200 | -1.63005800 | -0.04849900 |
| C          | 2.20797000  | 1.17447400 | -1.07893800 | C | -2.42905000 | -2.86708700 | -0.32325200 |

|   |             |             |             |           |             |             |             |
|---|-------------|-------------|-------------|-----------|-------------|-------------|-------------|
| C | -1.05362800 | -2.99457100 | -0.54013300 | H         | -6.90276900 | -3.15047300 | 2.03641200  |
| H | -2.05283100 | 2.86472300  | 0.63112800  | H         | -8.34275200 | -1.50367300 | 0.84754900  |
| H | 2.58251900  | 3.27325300  | -0.87785500 | Ni        | 1.67832200  | -1.82124300 | -0.63614500 |
| H | -3.60356800 | 0.99115300  | 0.67370900  | N         | 4.61428400  | -1.63947300 | 1.46500800  |
| H | -3.04581900 | -3.75984200 | -0.35481100 | C         | 3.41238200  | -1.24737500 | 2.19327500  |
| N | 1.33092400  | 0.14736700  | -0.99566700 | H         | 3.51281000  | -0.21390100 | 2.54728100  |
| N | -0.23122400 | -1.92522400 | -0.49366800 | H         | 2.53799500  | -1.32664400 | 1.54142200  |
| C | 3.57045300  | 0.86228300  | -1.63771200 | H         | 3.26559300  | -1.90051500 | 3.06421200  |
| H | 4.09505800  | 1.77276700  | -1.94412200 | C         | 5.84427400  | -1.53805000 | 2.23609000  |
| H | 4.19207300  | 0.34518600  | -0.89539400 | H         | 6.72246300  | -1.68570700 | 1.60945900  |
| H | 3.47986900  | 0.19067800  | -2.49812200 | H         | 5.91099600  | -0.53972400 | 2.68547900  |
| C | -0.41999000 | -4.33166900 | -0.80346900 | H         | 5.86610800  | -2.27655500 | 3.05083200  |
| H | -0.05713800 | -4.39237700 | -1.83688100 | C         | 4.55021700  | -2.19923500 | 0.21822400  |
| H | 0.45678400  | -4.46064300 | -0.15502000 | O         | 3.48829300  | -2.30939100 | -0.42662500 |
| H | -1.12482500 | -5.15273200 | -0.63860700 | C         | 5.82369400  | -2.72648700 | -0.41527400 |
| C | 0.23012300  | 4.23286800  | -0.03350700 | H         | 5.54920500  | -3.18075800 | -1.36794800 |
| C | 1.09598600  | 5.02695700  | 0.74165400  | H         | 6.54969900  | -1.92731300 | -0.60877600 |
| C | -0.91033300 | 4.84766400  | -0.58466800 | H         | 6.31574900  | -3.48094100 | 0.20962300  |
| C | 0.82824900  | 6.37656200  | 0.96707700  | <b>1b</b> |             |             |             |
| H | 1.97632800  | 4.56929700  | 1.18496200  | C         | -2.60216900 | -1.20504100 | 0.21007400  |
| C | -1.17816200 | 6.19738000  | -0.35864100 | C         | -1.96608100 | -0.00346700 | 0.55025600  |
| H | -1.57363000 | 4.26690300  | -1.21863300 | C         | -2.59983400 | 1.20258400  | 0.22168400  |
| C | -0.31217400 | 6.96863300  | 0.41997800  | C         | -3.83432700 | 1.20962000  | -0.42955300 |
| H | 1.50886300  | 6.96541000  | 1.57690100  | C         | -4.45697800 | 0.00527500  | -0.76352400 |
| H | -2.06086400 | 6.65060900  | -0.80266400 | C         | -3.83669600 | -1.20343500 | -0.44115200 |
| H | -0.52234000 | 8.02021500  | 0.59570600  | H         | -2.12742000 | -2.15106200 | 0.46266200  |
| C | -4.48585600 | -1.56490900 | 0.21192900  | H         | -2.12329000 | 2.14522300  | 0.48337900  |
| C | -5.31462100 | -0.64323700 | -0.45432900 | H         | -4.31140700 | 2.15568300  | -0.67203000 |
| C | -5.08733600 | -2.46975100 | 1.10574100  | H         | -5.41963600 | 0.00865200  | -1.26763000 |
| C | -6.69041200 | -0.62148000 | -0.22596200 | H         | -4.31561900 | -2.14619300 | -0.69268800 |
| H | -4.87672200 | 0.04197900  | -1.17410600 | C         | -0.60876200 | -0.00806400 | 1.22270300  |
| C | -6.46248200 | -2.44733200 | 1.33401800  | C         | 0.55203300  | -0.00129300 | 0.20123800  |
| H | -4.46214200 | -3.18181900 | 1.63762700  | H         | -0.51789100 | -0.89290900 | 1.86650000  |
| C | -7.27078500 | -1.52157800 | 0.67017300  | H         | -0.51771400 | 0.86802900  | 1.87835600  |
| H | -7.31148400 | 0.09457600  | -0.75805000 | C         | 1.90416000  | -0.00644700 | 0.89871600  |

|            |             |             |             |   |             |             |             |
|------------|-------------|-------------|-------------|---|-------------|-------------|-------------|
| H          | 0.47101400  | -0.87619200 | -0.45361400 | H | -0.76738200 | -3.92714100 | -1.92616100 |
| H          | 0.47141600  | 0.88260900  | -0.44145600 | H | -4.72400700 | 1.22199900  | 0.00995200  |
| H          | 2.05707600  | 0.87892100  | 1.51788200  | H | -1.42589600 | 4.81335100  | 0.41088400  |
| H          | 2.05677000  | -0.90057500 | 1.50525200  | N | 0.01590300  | -0.72057800 | -1.27424800 |
| Br         | 3.39910300  | 0.00255500  | -0.40597900 | N | -0.18038600 | 1.85135100  | -0.58268400 |
| <b>DMA</b> |             |             |             | C | 1.51678800  | -2.46651300 | -2.07007700 |
| N          | 0.59657500  | -0.08374700 | 0.00077900  | H | 1.51580000  | -3.52531100 | -2.34496400 |
| C          | 1.62391300  | 0.94636000  | 0.00003600  | H | 1.87373100  | -1.88468700 | -2.92862300 |
| H          | 2.26021900  | 0.85701900  | -0.89110600 | H | 2.24118800  | -2.31650200 | -1.26078000 |
| H          | 1.13273800  | 1.91835600  | 0.00181800  | C | 1.03296200  | 3.94981600  | -0.37059400 |
| H          | 2.26316300  | 0.85500200  | 0.88881700  | H | 1.80723300  | 3.53353600  | 0.28684900  |
| C          | 1.08400000  | -1.45043800 | -0.00033000 | H | 1.42473400  | 3.91328300  | -1.39657000 |
| H          | 0.26196600  | -2.16459500 | 0.00123600  | H | 0.88130400  | 4.99863100  | -0.09923500 |
| H          | 1.70247800  | -1.64129500 | -0.88909600 | C | -3.32593100 | -3.46945900 | -1.22873700 |
| H          | 1.70578200  | -1.64131300 | 0.88609000  | C | -3.51286500 | -4.33166400 | -2.32656600 |
| C          | -0.72901500 | 0.29340900  | 0.00002500  | C | -4.17846100 | -3.62589700 | -0.11864700 |
| O          | -1.06732500 | 1.47278200  | -0.00032500 | C | -4.51863900 | -5.29663800 | -2.32269800 |
| C          | -1.77919900 | -0.81327600 | 0.00009200  | H | -2.87209700 | -4.22287800 | -3.19748000 |
| H          | -2.75540600 | -0.32745700 | -0.00017200 | C | -5.18405600 | -4.59205000 | -0.11476100 |
| H          | -1.70317400 | -1.45431000 | -0.88571000 | H | -4.03006500 | -3.00049200 | 0.75661700  |
| H          | -1.70338500 | -1.45376300 | 0.88633100  | C | -5.36183200 | -5.43132800 | -1.21697300 |
| <b>CP2</b> |             |             |             | H | -4.64815700 | -5.94163100 | -3.18832700 |
| C          | -0.93278300 | -2.89168000 | -1.64734800 | H | -5.82343000 | -4.69678800 | 0.75825000  |
| C          | -2.22477500 | -2.47846700 | -1.23889900 | H | -6.14551400 | -6.18419000 | -1.21277000 |
| C          | -2.38663800 | -1.12323400 | -0.87225800 | C | -3.86397200 | 3.71163200  | 0.70712700  |
| C          | -1.24008800 | -0.26872100 | -0.89064400 | C | -4.68922700 | 3.16697400  | 1.71047700  |
| C          | 0.14281800  | -2.00878200 | -1.65224900 | C | -4.20878200 | 4.97548000  | 0.18946600  |
| C          | -3.64818800 | -0.51348100 | -0.54751800 | C | -5.81805400 | 3.84950100  | 2.16267100  |
| C          | -1.34406000 | 1.09568600  | -0.52316100 | H | -4.42394900 | 2.21259600  | 2.15556900  |
| C          | -2.59513300 | 1.65887000  | -0.12301900 | C | -5.33702600 | 5.65735200  | 0.64168600  |
| C          | -3.74656300 | 0.79929800  | -0.19421200 | H | -3.59212000 | 5.41092500  | -0.59212200 |
| C          | -2.63794600 | 3.02462800  | 0.23993500  | C | -6.15025900 | 5.09722500  | 1.62999900  |
| C          | -1.43403900 | 3.76478100  | 0.13262700  | H | -6.43347400 | 3.40938200  | 2.94343100  |
| C          | -0.24860300 | 3.16390900  | -0.27024400 | H | -5.58562800 | 6.62658300  | 0.21638400  |
| H          | -4.54875600 | -1.11341000 | -0.61755100 | H | -7.02986200 | 5.62845700  | 1.98362300  |

|    |            |             |             |            |             |             |             |
|----|------------|-------------|-------------|------------|-------------|-------------|-------------|
| Ni | 1.35088600 | 0.77015500  | -1.16672100 | H          | 6.30179900  | 0.25775000  | -1.71879100 |
| Br | 3.89417500 | 2.02942100  | 2.19726500  | H          | 6.05158300  | 2.01210000  | -1.64094500 |
| C  | 2.27018300 | 0.90630700  | 2.48559800  | <b>TS1</b> |             |             |             |
| C  | 2.60448200 | -0.57575400 | 2.49645300  | C          | 1.43140000  | -2.09029300 | 1.75864500  |
| H  | 1.59591500 | 1.17105300  | 1.66948700  | C          | 2.41755000  | -1.09475900 | 1.65444700  |
| H  | 1.86338500 | 1.25410900  | 3.43631900  | C          | 2.02358100  | 0.15863000  | 1.11924700  |
| C  | 1.34125500 | -1.41345500 | 2.80533400  | C          | 0.67391000  | 0.31359100  | 0.68317200  |
| H  | 3.00913300 | -0.86633000 | 1.52068400  | C          | 0.12542700  | -1.87425200 | 1.31303800  |
| H  | 3.37883500 | -0.78030000 | 3.24464700  | C          | 2.88142900  | 1.30812600  | 1.04983800  |
| H  | 0.92842500 | -1.08969600 | 3.77102600  | C          | 0.22944500  | 1.54828500  | 0.11791300  |
| H  | 0.57818900 | -1.20269800 | 2.04674700  | C          | 1.13038500  | 2.64669700  | -0.01219800 |
| C  | 1.62322500 | -2.90191700 | 2.84524000  | C          | 2.45724200  | 2.48720700  | 0.51426700  |
| C  | 2.31524000 | -3.47031200 | 3.92510700  | C          | 0.64688200  | 3.85000100  | -0.58672400 |
| C  | 1.21212800 | -3.74112400 | 1.80137700  | C          | -0.71155100 | 3.88976100  | -0.94375500 |
| C  | 2.59494600 | -4.83651200 | 3.95927200  | C          | -1.54242800 | 2.77939300  | -0.78636800 |
| H  | 2.63229600 | -2.83664700 | 4.75130200  | H          | 3.88200200  | 1.23741900  | 1.46150000  |
| C  | 1.48887400 | -5.11012700 | 1.83299800  | H          | 1.69846200  | -3.06925500 | 2.14269900  |
| H  | 0.65883600 | -3.32335900 | 0.96318700  | H          | 3.12537100  | 3.34104800  | 0.50683400  |
| C  | 2.18295800 | -5.66237100 | 2.91030500  | H          | -1.12104800 | 4.79221300  | -1.38590000 |
| H  | 3.12890200 | -5.25769000 | 4.80748000  | N          | -0.25725400 | -0.69904700 | 0.77852400  |
| H  | 1.15433200 | -5.74481800 | 1.01629800  | N          | -1.09073900 | 1.61558100  | -0.27884700 |
| H  | 2.39601100 | -6.72785100 | 2.93705200  | C          | -0.90046600 | -2.97446600 | 1.37101700  |
| N  | 4.21595100 | 1.10896400  | -3.50872800 | H          | -0.50623000 | -3.85631000 | 1.88451600  |
| C  | 2.96270600 | 0.97130200  | -4.24855600 | H          | -1.80549800 | -2.63047600 | 1.87957600  |
| H  | 2.95285100 | 0.03611000  | -4.82286100 | H          | -1.19776100 | -3.27043100 | 0.35683500  |
| H  | 2.11652200 | 0.97402600  | -3.55804200 | C          | -2.99214000 | 2.84929900  | -1.18507400 |
| H  | 2.86427900 | 1.81114500  | -4.94481000 | H          | -3.22639200 | 2.09674000  | -1.94472900 |
| C  | 5.37582300 | 1.43504300  | -4.33116800 | H          | -3.63743900 | 2.63358500  | -0.32368800 |
| H  | 6.29205100 | 1.43301700  | -3.74462300 | H          | -3.24788100 | 3.83979800  | -1.57290500 |
| H  | 5.47942100 | 0.69617600  | -5.13545900 | C          | 3.80103000  | -1.39993200 | 2.09434000  |
| H  | 5.25193300 | 2.42434500  | -4.78893400 | C          | 4.02747400  | -2.02568800 | 3.33457000  |
| C  | 4.27110300 | 0.87006600  | -2.17622000 | C          | 4.91516200  | -1.13790800 | 1.27392600  |
| O  | 3.27596400 | 0.49842300  | -1.52171000 | C          | 5.31613300  | -2.36337900 | 3.74512700  |
| C  | 5.58720700 | 1.04136300  | -1.44043300 | H          | 3.18154700  | -2.22897000 | 3.98558200  |
| H  | 5.37405400 | 0.96576400  | -0.37369200 | C          | 6.20410900  | -1.47835600 | 1.68443300  |

|    |             |             |             |            |             |             |             |
|----|-------------|-------------|-------------|------------|-------------|-------------|-------------|
| H  | 4.76309200  | -0.68477200 | 0.29869100  | H          | 2.20009600  | -6.72367700 | -3.31711700 |
| C  | 6.41167900  | -2.09030500 | 2.92249500  | H          | 3.57641600  | -3.57794400 | -0.72172500 |
| H  | 5.46566000  | -2.83682500 | 4.71217600  | H          | 3.70503500  | -5.94304700 | -1.49459400 |
| H  | 7.04721300  | -1.27318000 | 1.02972600  | N          | -4.47798800 | -0.25892900 | 3.59999300  |
| H  | 7.41621500  | -2.35469100 | 3.24155100  | C          | -3.28264300 | -0.36336000 | 4.42920700  |
| C  | 1.49132600  | 5.04764300  | -0.81452900 | H          | -3.33324300 | -1.25036200 | 5.07522600  |
| C  | 2.73395200  | 4.96677900  | -1.47113600 | H          | -2.40971600 | -0.43664900 | 3.78310300  |
| C  | 1.03384900  | 6.31966400  | -0.42262400 | H          | -3.19732900 | 0.52497400  | 5.06615500  |
| C  | 3.49291200  | 6.11139400  | -1.71344100 | C          | -5.71215400 | 0.01201200  | 4.31988900  |
| H  | 3.09147300  | 4.00080900  | -1.81555600 | H          | -6.56046000 | 0.07454400  | 3.64083800  |
| C  | 1.79349900  | 7.46330700  | -0.66369900 | H          | -5.91241800 | -0.78335900 | 5.05094200  |
| H  | 0.08132200  | 6.40228400  | 0.09373800  | H          | -5.63341000 | 0.96121800  | 4.86554600  |
| C  | 3.02840300  | 7.36500400  | -1.30920800 | C          | -4.39304800 | -0.49663800 | 2.25835200  |
| H  | 4.44557000  | 6.02391200  | -2.22965000 | O          | -3.31073800 | -0.81772100 | 1.74220900  |
| H  | 1.42243800  | 8.43306500  | -0.34180000 | C          | -5.64535800 | -0.35412500 | 1.41159000  |
| H  | 3.62076000  | 8.25616500  | -1.49836200 | H          | -5.35560600 | -0.49529400 | 0.36951500  |
| Ni | -2.05793700 | -0.15674900 | 0.01760800  | H          | -6.39333700 | -1.11105800 | 1.67466900  |
| Br | -3.59689500 | -0.78217300 | -1.81622500 | H          | -6.10796700 | 0.63278900  | 1.52347300  |
| C  | -2.07566000 | -1.35417400 | -3.42702400 | <b>CP3</b> |             |             |             |
| C  | -1.07979200 | -2.29705400 | -2.82411100 | C          | -0.30318100 | 3.42842300  | 0.10918500  |
| H  | -1.70406100 | -0.36090100 | -3.67162700 | C          | 0.97986000  | 2.89850800  | 0.07303900  |
| H  | -2.74488100 | -1.75705700 | -4.18457100 | C          | 1.10612600  | 1.47583400  | 0.08249100  |
| C  | 0.15336800  | -2.52362700 | -3.74344900 | C          | -0.08931100 | 0.71786000  | 0.08488700  |
| H  | -0.72935100 | -1.89136600 | -1.86445900 | C          | -1.44793700 | 2.60562800  | 0.12489700  |
| H  | -1.55299100 | -3.26332000 | -2.61044800 | C          | 2.35492900  | 0.77127000  | 0.13995300  |
| H  | -0.18057400 | -2.91124300 | -4.71396000 | C          | -0.03472100 | -0.72378200 | 0.08392600  |
| H  | 0.62733900  | -1.55243500 | -3.93756400 | C          | 1.21453100  | -1.38959700 | 0.08100300  |
| C  | 1.16066900  | -3.47590600 | -3.13261300 | C          | 2.40643200  | -0.59285900 | 0.13948000  |
| C  | 1.24130200  | -4.80938300 | -3.55468300 | C          | 1.19603900  | -2.81772200 | 0.07033100  |
| C  | 2.01533500  | -3.04996500 | -2.10473200 | C          | -0.04354500 | -3.44308000 | 0.10497100  |
| C  | 2.15063800  | -5.69418000 | -2.97105000 | C          | -1.24670700 | -2.70905400 | 0.12054500  |
| H  | 0.58756800  | -5.15666000 | -4.35231000 | H          | 3.27331200  | 1.34308400  | 0.20872100  |
| C  | 2.92408200  | -3.93026300 | -1.51657300 | H          | -0.43658300 | 4.50540300  | 0.09459900  |
| H  | 1.96834800  | -2.01874100 | -1.76135900 | H          | 3.36508300  | -1.09423800 | 0.20813400  |
| C  | 2.99522900  | -5.25694000 | -1.94936700 | H          | -0.09533700 | -4.52699000 | 0.08925000  |

|            |             |             |             |            |             |             |             |
|------------|-------------|-------------|-------------|------------|-------------|-------------|-------------|
| N          | -1.33262700 | 1.27326800  | 0.09833000  | C          | 3.77353700  | 0.00034700  | -0.28565000 |
| N          | -1.23221200 | -1.37152900 | 0.09630900  | C          | 2.31292200  | 0.00009700  | -0.58306200 |
| C          | -2.83099400 | 3.19255900  | 0.18146200  | H          | 4.29971200  | 0.92720500  | -0.07612000 |
| H          | -2.82690100 | 4.24470400  | -0.11796900 | H          | 4.30347300  | -0.92741000 | -0.09025800 |
| H          | -3.52153000 | 2.63100400  | -0.45513700 | C          | 1.42056400  | -0.00054000 | 0.70022200  |
| H          | -3.22671900 | 3.12969200  | 1.20337200  | H          | 2.04230100  | 0.88106100  | -1.18060300 |
| C          | -2.58260100 | -3.39690500 | 0.17123000  | H          | 2.04277200  | -0.88009300 | -1.18176100 |
| H          | -3.01401000 | -3.31320200 | 1.17676900  | H          | 1.67482300  | -0.88111400 | 1.30261100  |
| H          | -3.29352500 | -2.92139500 | -0.51168800 | H          | 1.67498000  | 0.87940800  | 1.30348700  |
| H          | -2.49130600 | -4.45864000 | -0.07541200 | C          | -0.05751400 | -0.00023900 | 0.37789300  |
| C          | 2.15102700  | 3.81292700  | 0.02478300  | C          | -0.75612100 | -1.20341600 | 0.20457200  |
| C          | 3.12711600  | 3.69631300  | -0.97975700 | C          | -0.75558800 | 1.20320500  | 0.20429400  |
| C          | 2.27285100  | 4.85088500  | 0.96353700  | C          | -2.11073300 | -1.20617900 | -0.13173700 |
| C          | 4.19512500  | 4.59133600  | -1.03973800 | H          | -0.23301200 | -2.14791000 | 0.34085500  |
| H          | 3.03283700  | 2.91707600  | -1.73072500 | C          | -2.11019100 | 1.20649100  | -0.13202400 |
| C          | 3.34524800  | 5.74073400  | 0.90624800  | H          | -0.23207200 | 2.14750300  | 0.34037200  |
| H          | 1.53032400  | 4.94603400  | 1.75110200  | C          | -2.79298900 | 0.00029000  | -0.30201100 |
| C          | 4.30953500  | 5.61396400  | -0.09560000 | H          | -2.63437300 | -2.15069000 | -0.25618300 |
| H          | 4.93463900  | 4.49338100  | -1.82979800 | H          | -2.63340900 | 2.15120500  | -0.25669700 |
| H          | 3.42800100  | 6.53179000  | 1.64648800  | H          | -3.84851500 | 0.00049200  | -0.56069200 |
| H          | 5.14351800  | 6.30872400  | -0.14179000 | <b>CP5</b> |             |             |             |
| C          | 2.43248300  | -3.64185800 | 0.02372000  | C          | 0.16726500  | 3.30275100  | -0.54926200 |
| C          | 2.62672900  | -4.67037200 | 0.96080300  | C          | 1.48320900  | 3.16695400  | -0.13833600 |
| C          | 3.40184500  | -3.45083400 | -0.97592800 | C          | 1.99438600  | 1.83885800  | -0.01288400 |
| C          | 3.76237600  | -5.47801100 | 0.90707700  | C          | 1.10296800  | 0.77122900  | -0.27287300 |
| H          | 1.88975400  | -4.82257600 | 1.74460400  | C          | -0.67035800 | 2.18722900  | -0.76473500 |
| C          | 4.53345700  | -4.26425800 | -1.03257700 | C          | 3.34037800  | 1.51995000  | 0.36739300  |
| H          | 3.25346700  | -2.67893800 | -1.72571800 | C          | 1.59818600  | -0.58240000 | -0.33703300 |
| C          | 4.71916500  | -5.27782000 | -0.08994800 | C          | 2.96942300  | -0.84498100 | -0.10490400 |
| H          | 3.90020200  | -6.26246100 | 1.64614800  | C          | 3.80436800  | 0.23693100  | 0.32859500  |
| H          | 5.26724600  | -4.10978900 | -1.81894700 | C          | 3.41986800  | -2.18358700 | -0.31646100 |
| H          | 5.60265500  | -5.90860300 | -0.13372400 | C          | 2.48912200  | -3.10407500 | -0.76938900 |
| Ni         | -2.81194600 | -0.10986000 | 0.01247900  | C          | 1.13294300  | -2.76176100 | -0.97596100 |
| Br         | -5.09605700 | -0.18373400 | -0.27943700 | H          | 3.99528500  | 2.32166900  | 0.68845500  |
| <b>CP4</b> |             |             |             | H          | -0.23530900 | 4.29346400  | -0.73671600 |



|    |             |             |             |            |              |             |             |
|----|-------------|-------------|-------------|------------|--------------|-------------|-------------|
| H  | 4.82630100  | 0.02389100  | 0.62084400  | Br         | -1.86610700  | -2.78006900 | 0.93796700  |
| H  | 2.80831700  | -4.11501800 | -1.00255300 | C          | -2.65211800  | 0.11663700  | 0.85867500  |
| N  | -0.22597300 | 0.94370000  | -0.55218400 | C          | -4.02388500  | -0.14912200 | 0.24204100  |
| N  | 0.69340700  | -1.52949800 | -0.70874700 | H          | -2.43288400  | 1.19112000  | 0.89447800  |
| C  | -2.05574700 | 2.40254700  | -1.30967100 | H          | -2.62065800  | -0.25825700 | 1.88599400  |
| H  | -1.99798900 | 3.04278300  | -2.19846800 | C          | -5.16729400  | 0.57438800  | 1.00149600  |
| H  | -2.51537400 | 1.45459600  | -1.58659000 | H          | -4.06243700  | 0.16387100  | -0.81131300 |
| H  | -2.70599200 | 2.90715500  | -0.58639700 | H          | -4.22077500  | -1.22570900 | 0.24647800  |
| C  | 0.18269700  | -3.78070900 | -1.53455100 | H          | -5.15458600  | 0.23863100  | 2.04689000  |
| H  | -0.31748900 | -4.31837000 | -0.72280100 | H          | -4.96481400  | 1.65433800  | 1.01818000  |
| H  | -0.60315300 | -3.29431000 | -2.11622600 | C          | -6.53208900  | 0.32440100  | 0.39758800  |
| H  | 0.72056400  | -4.49508000 | -2.16673500 | C          | -7.24078800  | -0.85140100 | 0.68735900  |
| C  | 2.30498800  | 4.38209600  | 0.10474800  | C          | -7.10793400  | 1.23850800  | -0.49560100 |
| C  | 3.52617700  | 4.58982200  | -0.55897600 | C          | -8.48276800  | -1.10494300 | 0.10438600  |
| C  | 1.83462600  | 5.37707800  | 0.97772000  | H          | -6.81166400  | -1.57332900 | 1.37896200  |
| C  | 4.25747300  | 5.75882000  | -0.34923600 | C          | -8.35047400  | 0.99050500  | -1.08247700 |
| H  | 3.88963800  | 3.84378600  | -1.25968500 | H          | -6.57645300  | 2.15922500  | -0.72936500 |
| C  | 2.57141200  | 6.54159500  | 1.19229700  | C          | -9.04338500  | -0.18393900 | -0.78400300 |
| H  | 0.89573400  | 5.22387000  | 1.50265400  | H          | -9.01519600  | -2.02154300 | 0.34634700  |
| C  | 3.78490100  | 6.73591300  | 0.52954000  | H          | -8.77875100  | 1.71682600  | -1.76918900 |
| H  | 5.19456000  | 5.90860600  | -0.87841500 | H          | -10.01225400 | -0.37906500 | -1.23651300 |
| H  | 2.19766500  | 7.29581800  | 1.87923900  | <b>CP6</b> |              |             |             |
| H  | 4.35783500  | 7.64408500  | 0.69471000  | C          | -2.26333800  | -3.43787400 | -0.14200600 |
| C  | 4.83125200  | -2.60559700 | -0.10981400 | C          | -3.45296600  | -2.72528200 | -0.03936500 |
| C  | 5.11547000  | -3.70872300 | 0.71182400  | C          | -3.36045500  | -1.30170400 | -0.04729600 |
| C  | 5.89508000  | -1.95627300 | -0.75880100 | C          | -2.06677800  | -0.72570300 | -0.11297100 |
| C  | 6.42892900  | -4.14276900 | 0.89021300  | C          | -1.01487000  | -2.79683000 | -0.22448700 |
| H  | 4.30141000  | -4.21359400 | 1.22450100  | C          | -4.49387800  | -0.42172300 | -0.05828300 |
| C  | 7.20715600  | -2.39689800 | -0.58540600 | C          | -1.91164000  | 0.70748300  | -0.10599100 |
| H  | 5.68949800  | -1.11970500 | -1.42060200 | C          | -3.05172500  | 1.54984300  | -0.06376500 |
| C  | 7.47847900  | -3.48849400 | 0.24222500  | C          | -4.34770300  | 0.93460000  | -0.07124700 |
| H  | 6.63151100  | -4.99160500 | 1.53744200  | C          | -2.83318500  | 2.95973600  | -0.06763200 |
| H  | 8.01724000  | -1.89017700 | -1.10287000 | C          | -1.51698800  | 3.39957300  | -0.15812300 |
| H  | 8.50128400  | -3.82841400 | 0.37909900  | C          | -0.43734700  | 2.49970900  | -0.19797800 |
| Ni | -1.16153100 | -0.75785000 | -0.03487700 | H          | -5.48776400  | -0.85391200 | -0.08677700 |

|   |             |             |             |            |             |             |             |
|---|-------------|-------------|-------------|------------|-------------|-------------|-------------|
| H | -2.29181000 | -4.52302500 | -0.13510000 | Ni         | 0.70386500  | -0.32973400 | -0.17618800 |
| H | -5.22628800 | 1.56863600  | -0.11004800 | Br         | 2.86912200  | -0.85038500 | -0.13177800 |
| H | -1.31059200 | 4.46541100  | -0.15628300 | C          | 4.34281100  | 0.69166400  | 0.07902100  |
| N | -0.91280700 | -1.45653900 | -0.20399500 | C          | 5.72429100  | 0.07796600  | 0.06970000  |
| N | -0.62770100 | 1.17282900  | -0.15192200 | H          | 4.06885800  | 1.16645200  | 1.02217100  |
| C | 0.25401400  | -3.59657900 | -0.32618000 | H          | 4.13673100  | 1.35119800  | -0.76504700 |
| H | 0.04280000  | -4.66735500 | -0.40993400 | C          | 6.84586200  | 1.13687500  | 0.23431800  |
| H | 0.83767600  | -3.27344900 | -1.19503300 | H          | 5.80884900  | -0.65937600 | 0.87804100  |
| H | 0.88533400  | -3.42739200 | 0.55343600  | H          | 5.88345000  | -0.46806000 | -0.86872300 |
| C | 0.98186900  | 2.99241200  | -0.27233100 | H          | 6.76552000  | 1.87094400  | -0.57777700 |
| H | 1.56437300  | 2.59463300  | 0.56604300  | H          | 6.68269100  | 1.68498000  | 1.17126900  |
| H | 1.46160400  | 2.62978400  | -1.18870900 | C          | 8.22941600  | 0.52142600  | 0.23519100  |
| H | 1.02881400  | 4.08577400  | -0.25691100 | C          | 8.94314600  | 0.35230200  | -0.95942600 |
| C | -4.74077500 | -3.45794500 | 0.07078100  | C          | 8.81224500  | 0.06835600  | 1.42703800  |
| C | -5.04678000 | -4.48617700 | -0.83741500 | C          | 10.20119700 | -0.25235300 | -0.96506600 |
| C | -5.65590400 | -3.18462300 | 1.10286200  | H          | 8.50927300  | 0.70248800  | -1.89393500 |
| C | -6.23280600 | -5.21096000 | -0.72429800 | C          | 10.06977200 | -0.53694800 | 1.42721300  |
| H | -4.35475900 | -4.70183200 | -1.64688600 | H          | 8.27529200  | 0.19581100  | 2.36493200  |
| C | -6.84011400 | -3.91259400 | 1.21742700  | C          | 10.76905600 | -0.69995400 | 0.22948200  |
| H | -5.42364000 | -2.41354800 | 1.83179300  | H          | 10.73957300 | -0.36987600 | -1.90215500 |
| C | -7.13453600 | -4.92649400 | 0.30327600  | H          | 10.50520100 | -0.87732100 | 2.36332700  |
| H | -6.45426100 | -5.99591700 | -1.44254000 | H          | 11.74980800 | -1.16814700 | 0.22757300  |
| H | -7.52988700 | -3.69210700 | 2.02780700  | <b>TS2</b> |             |             |             |
| H | -8.05828600 | -5.49163700 | 0.39236800  | C          | 0.12441900  | 3.19276000  | 0.13026900  |
| C | -3.93498300 | 3.95298200  | 0.02130200  | C          | 1.51833100  | 3.15639900  | 0.08374100  |
| C | -4.88919000 | 3.89787600  | 1.05254300  | C          | 2.13598900  | 1.87331000  | 0.11427500  |
| C | -4.01286800 | 5.00682100  | -0.90511000 | C          | 1.29508400  | 0.72932600  | 0.14667900  |
| C | -5.89117700 | 4.86319600  | 1.14924800  | C          | -0.64391700 | 2.02232300  | 0.11254000  |
| H | -4.82864700 | 3.10671300  | 1.79438200  | C          | 3.55564200  | 1.66576800  | 0.15090200  |
| C | -5.01778500 | 5.96936300  | -0.81006300 | C          | 1.86173700  | -0.58840500 | 0.25468500  |
| H | -3.28913300 | 5.05633300  | -1.71411100 | C          | 3.26956100  | -0.76180300 | 0.18258100  |
| C | -5.96113700 | 5.90080900  | 0.21712300  | C          | 4.09389400  | 0.41283000  | 0.15636000  |
| H | -6.61382200 | 4.80824000  | 1.95909000  | C          | 3.78130000  | -2.09077800 | 0.23326600  |
| H | -5.06576600 | 6.77107900  | -1.54216800 | C          | 2.85943100  | -3.11852800 | 0.42581200  |
| H | -6.74362700 | 6.65097600  | 0.29184600  | C          | 1.48600800  | -2.86427000 | 0.55428500  |

|   |             |             |             |            |              |             |             |
|---|-------------|-------------|-------------|------------|--------------|-------------|-------------|
| H | 4.20893500  | 2.53018000  | 0.18462600  | H          | 8.99442200   | -3.37344900 | -0.25781800 |
| H | -0.38400200 | 4.15162700  | 0.10229500  | Ni         | -0.89477300  | -0.96022200 | -0.12053500 |
| H | 5.17110500  | 0.29291700  | 0.18755800  | Br         | -2.29904800  | -2.54884800 | -1.07469900 |
| H | 3.20959400  | -4.14474100 | 0.48539500  | C          | -3.36362500  | -1.58934700 | 0.56256400  |
| N | -0.07483900 | 0.80194600  | 0.06741400  | C          | -4.66632600  | -1.06062200 | 0.01178300  |
| N | 0.98062500  | -1.62063500 | 0.45685500  | H          | -2.71986800  | -0.82743300 | 1.01493700  |
| C | -2.14491300 | 2.07848200  | 0.08642200  | H          | -3.45668200  | -2.45267500 | 1.21677200  |
| H | -2.50942100 | 3.10199600  | -0.04310000 | C          | -5.58030500  | -0.52807400 | 1.14620300  |
| H | -2.52529900 | 1.44965800  | -0.72839700 | H          | -4.47011900  | -0.25743700 | -0.70633100 |
| H | -2.56450300 | 1.68474600  | 1.02249300  | H          | -5.19259900  | -1.85140000 | -0.53518800 |
| C | 0.51981600  | -3.98580400 | 0.81490900  | H          | -5.75936000  | -1.33428500 | 1.86950200  |
| H | -0.16941200 | -3.71063600 | 1.62107400  | H          | -5.05647200  | 0.27017900  | 1.68739600  |
| H | -0.09727900 | -4.18340500 | -0.07037200 | C          | -6.90219600  | -0.00853800 | 0.61994400  |
| H | 1.04224600  | -4.90722900 | 1.08940100  | C          | -7.99233000  | -0.87170300 | 0.44280100  |
| C | 2.27890900  | 4.42965700  | 0.00501700  | C          | -7.05455500  | 1.33860400  | 0.26516200  |
| C | 3.24537800  | 4.65007700  | -0.99280000 | C          | -9.20064200  | -0.40365000 | -0.07538300 |
| C | 2.00194400  | 5.47385000  | 0.90469900  | H          | -7.89420300  | -1.91972700 | 0.71879000  |
| C | 3.91547600  | 5.87006100  | -1.08116000 | C          | -8.26104700  | 1.81180300  | -0.25328300 |
| H | 3.45201800  | 3.86756500  | -1.71716500 | H          | -6.22068300  | 2.02430000  | 0.40181200  |
| C | 2.67425600  | 6.69264000  | 0.81737200  | C          | -9.33874600  | 0.94103500  | -0.42582300 |
| H | 1.26601700  | 5.31643000  | 1.68862900  | H          | -10.03549200 | -1.08829100 | -0.20097700 |
| C | 3.63488300  | 6.89553100  | -0.17551200 | H          | -8.36017900  | 2.86128900  | -0.51830300 |
| H | 4.65218600  | 6.02223700  | -1.86562300 | H          | -10.27988000 | 1.30798400  | -0.82642600 |
| H | 2.45033800  | 7.48273400  | 1.52934400  | <b>TS3</b> |              |             |             |
| H | 4.15879600  | 7.84497700  | -0.24452500 | C          | 3.38005900   | -1.95557500 | 0.15997500  |
| C | 5.22541600  | -2.41197200 | 0.10610300  | C          | 3.61506900   | -0.60016000 | 0.32373600  |
| C | 5.84551200  | -3.26752300 | 1.03386700  | C          | 2.50333100   | 0.27853100  | 0.15314600  |
| C | 5.99682300  | -1.91702800 | -0.96088500 | C          | 1.23093800   | -0.30797900 | -0.06136600 |
| C | 7.19128000  | -3.60912200 | 0.90547800  | C          | 2.08655600   | -2.47164300 | -0.06793200 |
| H | 5.26757600  | -3.64953800 | 1.87100700  | C          | 2.61713900   | 1.70621900  | 0.09848500  |
| C | 7.34221100  | -2.26119000 | -1.09013400 | C          | 0.09252200   | 0.52829200  | -0.34612100 |
| H | 5.52897700  | -1.27851200 | -1.70466900 | C          | 0.24153100   | 1.93662300  | -0.40989700 |
| C | 7.94588600  | -3.10679300 | -0.15687400 | C          | 1.53880200   | 2.49698500  | -0.17094600 |
| H | 7.65222300  | -4.26483000 | 1.63957800  | C          | -0.90063500  | 2.70338600  | -0.79130900 |
| H | 7.91733300  | -1.87435300 | -1.92733600 | C          | -2.04339400  | 2.00535200  | -1.15020400 |

|   |             |             |             |            |             |             |             |
|---|-------------|-------------|-------------|------------|-------------|-------------|-------------|
| C | -2.11983100 | 0.59934000  | -1.07030300 | H          | -0.25923500 | 6.92917000  | 1.09007100  |
| H | 3.59494400  | 2.15541300  | 0.22831600  | H          | -1.01749800 | 8.08596100  | -0.97786000 |
| H | 4.20586100  | -2.65583400 | 0.23640600  | Ni         | -0.94778500 | -2.08329700 | -0.24472400 |
| H | 1.66625800  | 3.57026700  | -0.25285900 | Br         | -1.08108800 | -3.28033500 | -2.49237100 |
| H | -2.92425000 | 2.55088200  | -1.47275400 | C          | -0.97145000 | -3.66792900 | 1.08764600  |
| N | 1.02152400  | -1.65933500 | -0.10280500 | C          | -2.15050200 | -3.00030800 | 1.39029200  |
| N | -1.07935400 | -0.11519600 | -0.62312200 | H          | -0.09661000 | -3.50870000 | 1.71307500  |
| C | 1.89933000  | -3.94552900 | -0.29686100 | H          | -0.98928200 | -4.56462800 | 0.47745300  |
| H | 2.82664100  | -4.38426700 | -0.67832200 | C          | -2.29690700 | -2.06820700 | 2.57977800  |
| H | 1.64537800  | -4.47149900 | 0.63083200  | H          | -2.38321800 | -2.20750900 | -0.33720500 |
| H | 1.09207900  | -4.10754900 | -1.01989300 | H          | -3.08324200 | -3.42277600 | 1.02241500  |
| C | -3.36992100 | -0.11966500 | -1.48670300 | H          | -2.56305100 | -2.70061500 | 3.44333500  |
| H | -3.11008200 | -0.97944200 | -2.11405200 | H          | -1.32771300 | -1.61561300 | 2.81528500  |
| H | -3.90679300 | -0.49792300 | -0.60882500 | C          | -3.35470500 | -0.98995300 | 2.43943400  |
| H | -4.03747500 | 0.55193400  | -2.03495800 | C          | -4.71112200 | -1.32956800 | 2.32440100  |
| C | 4.98821700  | -0.11860000 | 0.62710600  | C          | -3.00808500 | 0.36627500  | 2.44619200  |
| C | 5.23707800  | 0.72651500  | 1.72220700  | C          | -5.69044600 | -0.34246200 | 2.20716900  |
| C | 6.07531600  | -0.54568200 | -0.15329000 | H          | -5.00598900 | -2.37694500 | 2.33323200  |
| C | 6.53644300  | 1.13221200  | 2.02599700  | C          | -3.98492700 | 1.35880800  | 2.33383400  |
| H | 4.41033300  | 1.04645200  | 2.35020600  | H          | -1.96191800 | 0.64824800  | 2.54027600  |
| C | 7.37320700  | -0.13325800 | 0.14761900  | C          | -5.32994800 | 1.00756800  | 2.21145500  |
| H | 5.89550100  | -1.18834300 | -1.01066800 | H          | -6.73562000 | -0.62746800 | 2.11917300  |
| C | 7.60813600  | 0.70623800  | 1.23836600  | H          | -3.69293600 | 2.40580800  | 2.34167200  |
| H | 6.71170700  | 1.77718400  | 2.88276400  | H          | -6.09201400 | 1.77748700  | 2.12532800  |
| H | 8.20058200  | -0.46593700 | -0.47315100 | <b>CP7</b> |             |             |             |
| H | 8.61952400  | 1.02567600  | 1.47383100  | C          | -2.86765700 | 1.63158600  | -0.40043000 |
| C | -0.89715000 | 4.18903600  | -0.84379800 | C          | -1.71641900 | 2.34738800  | -0.12007300 |
| C | -1.33502900 | 4.85448500  | -2.00100100 | C          | -0.49964000 | 1.61042600  | -0.00927000 |
| C | -0.50828800 | 4.95788300  | 0.26668600  | C          | -0.57142800 | 0.20487600  | -0.17751800 |
| C | -1.37473300 | 6.24771100  | -2.04980000 | C          | -2.86075800 | 0.22774100  | -0.56028900 |
| H | -1.62632000 | 4.27257900  | -2.87101100 | C          | 0.77126400  | 2.20252900  | 0.28787700  |
| C | -0.55443400 | 6.35107200  | 0.21857900  | C          | 0.63927000  | -0.58028300 | -0.14995600 |
| H | -0.19038000 | 4.45924700  | 1.17811000  | C          | 1.89422300  | 0.05403700  | 0.02183900  |
| C | -0.98504300 | 7.00062100  | -0.94030300 | C          | 1.91521500  | 1.46096300  | 0.29776300  |
| H | -1.70703500 | 6.74467700  | -2.95711300 | C          | 3.06318200  | -0.75992300 | -0.05606000 |

|   |             |             |             |             |             |             |             |
|---|-------------|-------------|-------------|-------------|-------------|-------------|-------------|
| C | 2.87912100  | -2.11525900 | -0.28072100 | H           | 7.33590500  | -0.78751800 | 1.78668000  |
| C | 1.59909600  | -2.68986700 | -0.41243100 | H           | 6.53026300  | 2.12068800  | -1.27980000 |
| H | 0.81240000  | 3.26178400  | 0.51378300  | H           | 8.10515400  | 1.09017400  | 0.34682400  |
| H | -3.80488300 | 2.16088100  | -0.53745300 | Ni          | -1.34348700 | -2.50504100 | -0.10554500 |
| H | 2.86324700  | 1.93202300  | 0.52987900  | Br          | -3.35727000 | -3.42490900 | 0.54535700  |
| H | 3.74527800  | -2.76043500 | -0.38340600 | H           | -0.92351100 | -3.85737200 | 0.17887800  |
| N | -1.73075900 | -0.47497200 | -0.41020400 | <b>CP13</b> |             |             |             |
| N | 0.49589200  | -1.92968900 | -0.32596400 | C           | 3.20398400  | 1.52778100  | -0.22213100 |
| C | -4.12845200 | -0.47779700 | -0.93943200 | C           | 2.11064500  | 2.37188600  | -0.31140400 |
| H | -4.90314800 | 0.24467200  | -1.21207100 | C           | 0.82204800  | 1.76578800  | -0.40378600 |
| H | -3.95349600 | -1.15628500 | -1.77934400 | C           | 0.75049600  | 0.35098500  | -0.31191800 |
| H | -4.48057100 | -1.10960700 | -0.11777200 | C           | 3.05843200  | 0.12640000  | -0.14420400 |
| C | 1.47560900  | -4.16595700 | -0.66988800 | C           | -0.38002500 | 2.50586100  | -0.65126900 |
| H | 1.13679500  | -4.68873800 | 0.23132800  | C           | -0.52462100 | -0.31179400 | -0.47893800 |
| H | 0.73210500  | -4.36503700 | -1.44555700 | C           | -1.69613600 | 0.45549400  | -0.70686700 |
| H | 2.44114200  | -4.58122200 | -0.97505600 | C           | -1.58281700 | 1.88081100  | -0.79112300 |
| C | -1.78793200 | 3.82611000  | 0.02424100  | C           | -2.91883800 | -0.24963700 | -0.90950000 |
| C | -0.99268800 | 4.67926900  | -0.75970400 | C           | -2.85878400 | -1.63271200 | -0.95236600 |
| C | -2.70516900 | 4.39616400  | 0.92232100  | C           | -1.65197000 | -2.32830100 | -0.73267200 |
| C | -1.10981100 | 6.06427600  | -0.64311100 | H           | -0.31506000 | 3.58190700  | -0.76382500 |
| H | -0.29936700 | 4.25445000  | -1.48001200 | H           | 4.20447200  | 1.94676600  | -0.18171800 |
| C | -2.81529700 | 5.78130100  | 1.04306000  | H           | -2.47118400 | 2.46201400  | -1.01026700 |
| H | -3.32018300 | 3.74614900  | 1.53851100  | H           | -3.76547300 | -2.20358400 | -1.12489700 |
| C | -2.01817800 | 6.61928900  | 0.26078900  | N           | 1.84766800  | -0.44151000 | -0.13296200 |
| H | -0.49523600 | 6.70998900  | -1.26443500 | N           | -0.52149800 | -1.67151200 | -0.45927400 |
| H | -3.52327400 | 6.20510900  | 1.74990300  | C           | 4.28638800  | -0.74068900 | -0.08155800 |
| H | -2.10603400 | 7.69828300  | 0.35276300  | H           | 5.13168000  | -0.22632900 | -0.54933800 |
| C | 4.44151800  | -0.21730700 | 0.06953200  | H           | 4.57187000  | -0.95537300 | 0.95585000  |
| C | 5.34506300  | -0.80131600 | 0.97283800  | H           | 4.10526500  | -1.68526200 | -0.60213100 |
| C | 4.88758500  | 0.84280500  | -0.73837700 | C           | -1.62124000 | -3.82989800 | -0.80714300 |
| C | 6.65389900  | -0.33049500 | 1.07501300  | H           | -0.82945300 | -4.15125900 | -1.49164200 |
| H | 5.00985700  | -1.61561500 | 1.60931400  | H           | -1.39594100 | -4.26469200 | 0.17311400  |
| C | 6.19900100  | 1.30720000  | -0.64016400 | H           | -2.58327400 | -4.22228200 | -1.14985200 |
| H | 4.21061700  | 1.28659300  | -1.46263400 | C           | 2.31855600  | 3.84454600  | -0.33505600 |
| C | 7.08490400  | 0.72501200  | 0.26892300  | C           | 1.66107700  | 4.68798000  | 0.57647000  |

|    |             |             |             |            |             |             |             |
|----|-------------|-------------|-------------|------------|-------------|-------------|-------------|
| C  | 3.22560600  | 4.41292800  | -1.24435400 | H          | -1.16845400 | -2.68185700 | 3.58516000  |
| C  | 1.90453200  | 6.06129200  | 0.57664600  | C          | -1.47896400 | 1.16743000  | 3.31523000  |
| H  | 0.97315000  | 4.26057400  | 1.30058000  | H          | 0.62826200  | 1.15556300  | 2.87572400  |
| C  | 3.46203800  | 5.78756200  | -1.24823800 | C          | -2.60554900 | 0.39954700  | 3.61305000  |
| H  | 3.73149700  | 3.77282500  | -1.96181500 | H          | -3.35173300 | -1.59814900 | 3.94055600  |
| C  | 2.80323000  | 6.61566600  | -0.33738300 | H          | -1.55761600 | 2.24967500  | 3.24790900  |
| H  | 1.39542200  | 6.69764500  | 1.29538500  | H          | -3.56711800 | 0.87666000  | 3.78411700  |
| H  | 4.15974400  | 6.21128000  | -1.96533200 |            |             |             |             |
| H  | 2.98947800  | 7.68605100  | -0.33879100 | <b>CP8</b> |             |             |             |
| C  | -4.22555200 | 0.43862200  | -1.08230800 | C          | -3.47357600 | -0.54772700 | -0.11333500 |
| C  | -5.03433500 | 0.15488800  | -2.19449200 | C          | -2.41777000 | 0.17011300  | -0.49985600 |
| C  | -4.69842400 | 1.34278500  | -0.11606000 | H          | -3.69799500 | -0.71297900 | 0.93887900  |
| C  | -6.27877300 | 0.76753600  | -2.34306500 | H          | -4.15732800 | -0.99268700 | -0.83138800 |
| H  | -4.67475700 | -0.53569400 | -2.95243400 | C          | -1.42751000 | 0.82202100  | 0.43322800  |
| C  | -5.94597900 | 1.94899400  | -0.26320200 | H          | -2.22439800 | 0.30858900  | -1.56422400 |
| H  | -4.09382800 | 1.54575100  | 0.76360800  | H          | -1.46704300 | 1.91264600  | 0.30224300  |
| C  | -6.73816500 | 1.66621800  | -1.37828200 | H          | -1.72993400 | 0.62385800  | 1.47092800  |
| H  | -6.88782700 | 0.54436400  | -3.21480400 | C          | 0.00628000  | 0.35914300  | 0.21429400  |
| H  | -6.30214600 | 2.63853900  | 0.49748500  | C          | 1.03638100  | 1.28210800  | -0.00199800 |
| H  | -7.70824900 | 2.14189900  | -1.49329800 | C          | 0.32627300  | -1.00608900 | 0.23624300  |
| Ni | 1.33542200  | -2.45420700 | 0.04900800  | C          | 2.35458700  | 0.85743900  | -0.18504200 |
| Br | 2.25175400  | -3.15770400 | -2.12310300 | H          | 0.80499000  | 2.34498400  | -0.02496500 |
| C  | 2.50560100  | -3.18162900 | 1.56206400  | C          | 1.64107800  | -1.43464300 | 0.05492900  |
| C  | 1.32119200  | -2.72895800 | 2.14340500  | H          | -0.46578200 | -1.73475400 | 0.39048900  |
| H  | 3.41340800  | -2.59257900 | 1.64903800  | C          | 2.66128900  | -0.50338400 | -0.15638100 |
| H  | 2.65246600  | -4.23014200 | 1.32490100  | H          | 3.13964800  | 1.59066700  | -0.35160900 |
| C  | 1.25770600  | -1.49146300 | 3.01978100  | H          | 1.86997800  | -2.49717300 | 0.07655000  |
| H  | 0.88517000  | -3.80895200 | -0.00337100 | H          | 3.68566300  | -0.83702900 | -0.29940300 |
| H  | 0.52790400  | -3.45586900 | 2.30477100  |            |             |             |             |
| H  | 1.61316600  | -1.78744900 | 4.02226300  | <b>TS4</b> |             |             |             |
| H  | 1.97571800  | -0.74551300 | 2.66118000  | C          | 2.98528800  | 1.17931200  | -0.74307900 |
| C  | -0.10618300 | -0.84324700 | 3.18834500  | C          | 1.92422900  | 2.06910700  | -0.79961300 |
| C  | -1.24643300 | -1.60130200 | 3.49536700  | C          | 0.60922900  | 1.53428100  | -0.66617600 |
| C  | -0.24439400 | 0.54844000  | 3.10540400  | C          | 0.48567800  | 0.14501400  | -0.40519200 |
| C  | -2.48317600 | -0.98946400 | 3.70221000  | C          | 2.78486900  | -0.19202700 | -0.48999800 |
|    |             |             |             | C          | -0.58189100 | 2.31284800  | -0.84398300 |
|    |             |             |             | C          | -0.83311300 | -0.45154900 | -0.31510900 |

|   |             |             |             |            |             |             |             |
|---|-------------|-------------|-------------|------------|-------------|-------------|-------------|
| C | -1.98954200 | 0.35993600  | -0.46188100 | C          | -6.04715900 | 2.18042600  | 0.37456000  |
| C | -1.82121300 | 1.75531600  | -0.74299500 | H          | -4.06402000 | 1.82850200  | 1.13690100  |
| C | -3.25898500 | -0.28720000 | -0.38606500 | C          | -7.02728900 | 1.78040700  | -0.53637600 |
| C | -3.27059100 | -1.66773500 | -0.24708400 | H          | -7.52667500 | 0.40222200  | -2.11903400 |
| C | -2.07139400 | -2.40126600 | -0.13457800 | H          | -6.24221300 | 3.00067600  | 1.06016800  |
| H | -0.48320800 | 3.36243800  | -1.09570000 | H          | -7.98444800 | 2.29356900  | -0.56880400 |
| H | 3.99994700  | 1.54501600  | -0.86353200 | Ni         | 1.14506700  | -2.65258700 | 0.09835800  |
| H | -2.70127500 | 2.36482000  | -0.91386100 | Br         | 1.54034200  | -3.39572400 | -2.17842400 |
| H | -4.21868000 | -2.19427600 | -0.19657700 | C          | 1.90392000  | -3.78659400 | 1.64155600  |
| N | 1.55865700  | -0.68150200 | -0.27871500 | C          | 1.22708000  | -2.64956200 | 2.14411800  |
| N | -0.88815300 | -1.79161200 | -0.13938600 | H          | 2.98483500  | -3.76057400 | 1.50850900  |
| C | 3.94784100  | -1.14510400 | -0.48040700 | H          | 1.52215500  | -4.78673800 | 1.83777200  |
| H | 4.88565600  | -0.62377700 | -0.69317300 | C          | 1.96399400  | -1.51760300 | 2.83895800  |
| H | 4.04474000  | -1.65290000 | 0.48500300  | H          | 0.95943600  | -4.08431900 | 0.20578200  |
| H | 3.77665100  | -1.92336000 | -1.23382800 | H          | 0.21734100  | -2.82903700 | 2.51245300  |
| C | -2.08369400 | -3.90135000 | -0.00520000 | H          | 2.27400800  | -1.89322700 | 3.83015000  |
| H | -1.43249500 | -4.34112000 | -0.76793400 | H          | 2.89884900  | -1.29769300 | 2.31252200  |
| H | -1.69151100 | -4.21052200 | 0.97092300  | C          | 1.20387200  | -0.22107600 | 3.06973900  |
| H | -3.09526300 | -4.30316400 | -0.11442700 | C          | -0.15442300 | -0.20203800 | 3.41829700  |
| C | 2.19041000  | 3.51783700  | -1.00416600 | C          | 1.88525500  | 1.00313200  | 3.01705700  |
| C | 1.68167000  | 4.48037800  | -0.11526100 | C          | -0.80975600 | 0.99901200  | 3.69634700  |
| C | 3.00378800  | 3.94444000  | -2.06650300 | H          | -0.71175200 | -1.13232000 | 3.47878900  |
| C | 1.97744600  | 5.83238000  | -0.28852800 | C          | 1.23695000  | 2.20672500  | 3.30064400  |
| H | 1.07277300  | 4.15946900  | 0.72523100  | H          | 2.94035300  | 1.01351100  | 2.75314700  |
| C | 3.29285500  | 5.29779500  | -2.24184900 | C          | -0.11735000 | 2.21004000  | 3.63986400  |
| H | 3.39323600  | 3.21052000  | -2.76672700 | H          | -1.86329000 | 0.98569700  | 3.96464400  |
| C | 2.78099100  | 6.24568100  | -1.35353100 | H          | 1.79276800  | 3.14026400  | 3.25802500  |
| H | 1.58388100  | 6.56330700  | 0.41279000  | H          | -0.62611000 | 3.14417100  | 3.86317200  |
| H | 3.91553200  | 5.61134100  | -3.07530300 | <b>CP9</b> |             |             |             |
| H | 3.00760900  | 7.29959400  | -1.48943900 | C          | 0.26680900  | 3.26780800  | -0.85088000 |
| C | -4.54693200 | 0.45404600  | -0.45458800 | C          | -0.97306700 | 3.06951700  | -0.26634100 |
| C | -5.54327000 | 0.05684000  | -1.36130500 | C          | -1.41308100 | 1.72271700  | -0.09558200 |
| C | -4.81648700 | 1.52518100  | 0.41434400  | C          | -0.52461000 | 0.67647300  | -0.46399500 |
| C | -6.77119900 | 0.71712900  | -1.40433700 | C          | 1.10160900  | 2.18823700  | -1.19640200 |
| H | -5.34265500 | -0.76244200 | -2.04615500 | C          | -2.72894500 | 1.38689000  | 0.36469600  |

|   |             |             |             |            |             |             |             |
|---|-------------|-------------|-------------|------------|-------------|-------------|-------------|
| C | -0.96900000 | -0.70603300 | -0.36228400 | H          | -4.51522000 | -3.90913200 | -1.06674100 |
| C | -2.27369900 | -0.99371400 | 0.12640700  | C          | -5.62503000 | -2.89900700 | 2.50559600  |
| C | -3.13979800 | 0.09264100  | 0.47452700  | H          | -3.76436300 | -1.82222800 | 2.61674000  |
| C | -2.67281400 | -2.36470300 | 0.16977200  | C          | -6.44738500 | -3.71722200 | 1.72804800  |
| C | -1.79035800 | -3.31067000 | -0.33011300 | H          | -6.67711500 | -4.71612700 | -0.17022700 |
| C | -0.52172900 | -2.93230900 | -0.81842600 | H          | -5.92817900 | -2.61887600 | 3.51081000  |
| H | -3.41747600 | 2.19161400  | 0.59428600  | H          | -7.39706800 | -4.06859400 | 2.12191100  |
| H | 0.62857400  | 4.27715600  | -1.01662100 | Ni         | 1.90837300  | -0.59005400 | -1.32019900 |
| H | -4.15293100 | -0.12537500 | 0.79252000  | Br         | 1.83998900  | -0.78285100 | -3.73058800 |
| H | -2.06722400 | -4.36060300 | -0.32524100 | C          | 3.52425100  | -1.79245900 | -0.35282900 |
| N | 0.72272100  | 0.92473400  | -0.96141300 | C          | 2.67601900  | -0.82101700 | 0.42182900  |
| N | -0.12460200 | -1.66484400 | -0.79900200 | H          | 4.58334100  | -1.52108200 | -0.39794700 |
| C | 2.43655500  | 2.43027700  | -1.84161900 | H          | 3.41748600  | -2.83794000 | -0.04779900 |
| H | 2.55420600  | 3.48481900  | -2.10845300 | C          | 3.37922600  | 0.34431200  | 1.11429900  |
| H | 3.25443500  | 2.15169200  | -1.16845200 | H          | 3.21365800  | -1.81816600 | -1.46116800 |
| H | 2.52695600  | 1.80806400  | -2.73961300 | H          | 1.94773300  | -1.30094300 | 1.08094000  |
| C | 0.44209200  | -3.94476900 | -1.37960300 | H          | 4.09904300  | 0.80300500  | 0.42515000  |
| H | 0.91456800  | -3.53711900 | -2.27953200 | H          | 2.63554300  | 1.11415600  | 1.35977600  |
| H | 1.23677100  | -4.16711400 | -0.65577600 | C          | 4.10334500  | -0.06819300 | 2.38699900  |
| H | -0.06097400 | -4.88513800 | -1.62409300 | C          | 5.48860700  | -0.27819000 | 2.39827100  |
| C | -1.78814600 | 4.24680500  | 0.13613700  | C          | 3.39109500  | -0.27947800 | 3.57697500  |
| C | -2.27556200 | 4.38327200  | 1.44716200  | C          | 6.14445700  | -0.69255500 | 3.55986800  |
| C | -2.03825200 | 5.27692700  | -0.78542600 | H          | 6.06175500  | -0.10757200 | 1.48927900  |
| C | -2.99547800 | 5.51719200  | 1.82285400  | C          | 4.04080100  | -0.69275200 | 4.74010000  |
| H | -2.06906100 | 3.60709100  | 2.17864200  | H          | 2.31535500  | -0.11413700 | 3.59040500  |
| C | -2.76465100 | 6.40688500  | -0.40996000 | C          | 5.42222100  | -0.90264900 | 4.73539000  |
| H | -1.67609800 | 5.17860300  | -1.80506200 | H          | 7.22061400  | -0.84604500 | 3.54623000  |
| C | -3.24502400 | 6.53082600  | 0.89514100  | H          | 3.46983900  | -0.84659400 | 5.65248000  |
| H | -3.35632800 | 5.61100200  | 2.84348300  | H          | 5.93054100  | -1.22228800 | 5.64121200  |
| H | -2.95738000 | 7.18907200  | -1.13907200 | <b>TS5</b> |             |             |             |
| H | -3.80887700 | 7.41209700  | 1.18811700  | C          | -2.21968500 | -3.17102500 | 0.05391400  |
| C | -3.98953200 | -2.80287000 | 0.70714800  | C          | -3.12177500 | -2.12370000 | -0.06255400 |
| C | -4.82191300 | -3.63290900 | -0.06168700 | C          | -2.59768200 | -0.79564000 | -0.06615600 |
| C | -4.40755200 | -2.44346400 | 1.99979600  | C          | -1.18465300 | -0.65112400 | -0.01944200 |
| C | -6.04195900 | -4.08268700 | 0.44295100  | C          | -0.82947600 | -2.93615900 | 0.10894500  |



|   |             |             |             |             |             |             |             |
|---|-------------|-------------|-------------|-------------|-------------|-------------|-------------|
| C | -3.41274400 | 0.38275000  | -0.04263400 | C           | -2.09341700 | 6.54176200  | 1.08538900  |
| C | -0.59322900 | 0.67374700  | 0.02785400  | H           | -0.75847100 | 5.09696800  | 1.96328900  |
| C | -1.43651900 | 1.81618200  | 0.03582800  | C           | -3.12116100 | 5.89713900  | -1.00209400 |
| C | -2.85781600 | 1.62671800  | 0.00727500  | H           | -2.57318000 | 3.96099400  | -1.76618600 |
| C | -0.81892800 | 3.09792300  | 0.14385400  | C           | -2.94859700 | 6.83233400  | 0.02065800  |
| C | 0.55650700  | 3.13185300  | 0.30540900  | H           | -1.95608000 | 7.26192800  | 1.88734500  |
| C | 1.33264700  | 1.95519900  | 0.29652800  | H           | -3.77679700 | 6.11955800  | -1.83963500 |
| H | -4.49111500 | 0.27352300  | -0.02534600 | H           | -3.47622400 | 7.78151600  | -0.01279400 |
| H | -2.58383300 | -4.19362500 | 0.07456300  | Ni          | 1.80469400  | -0.98732100 | 0.01261900  |
| H | -3.49839100 | 2.49909100  | 0.06493100  | Br          | 2.27852600  | -1.21023300 | 2.37753200  |
| H | 1.06177300  | 4.08630400  | 0.41133400  | C           | 2.14511700  | -0.81940700 | -2.01239400 |
| N | -0.33616600 | -1.70267200 | 0.03808400  | C           | 3.24837400  | -1.50740100 | -1.47715100 |
| N | 0.76390900  | 0.75725400  | 0.11755000  | H           | 2.55352800  | -2.23432900 | 0.02417000  |
| C | 0.14888000  | -4.07147800 | 0.25125900  | H           | 3.31423400  | -2.57276800 | -1.70304400 |
| H | -0.36386200 | -5.01822400 | 0.44539300  | C           | 4.56103100  | -0.87017600 | -1.15871000 |
| H | 0.74855600  | -4.18432700 | -0.65992000 | C           | 5.33648000  | -1.30691900 | -0.07166800 |
| H | 0.84309000  | -3.85405400 | 1.06961000  | C           | 5.08112200  | 0.13509900  | -1.99069300 |
| C | 2.81884100  | 2.01868600  | 0.50132900  | C           | 6.58781000  | -0.74767800 | 0.17786500  |
| H | 3.09997600  | 1.34557300  | 1.31953700  | H           | 4.93012800  | -2.05377500 | 0.60328100  |
| H | 3.36400700  | 1.68231000  | -0.38696600 | C           | 6.33418100  | 0.69797700  | -1.73683300 |
| H | 3.13756800  | 3.03837100  | 0.73669800  | H           | 4.50917800  | 0.46292200  | -2.85478600 |
| C | -4.57722900 | -2.41635100 | -0.16114300 | C           | 7.09249500  | 0.25828100  | -0.65167800 |
| C | -5.35334700 | -1.91163600 | -1.21830500 | H           | 7.16634400  | -1.09075900 | 1.03149700  |
| C | -5.19303300 | -3.25233200 | 0.78479400  | H           | 6.71896600  | 1.47306300  | -2.39498000 |
| C | -6.70676500 | -2.23233500 | -1.32311000 | H           | 8.06832000  | 0.69356200  | -0.45297200 |
| H | -4.88662600 | -1.28355000 | -1.97191400 | H           | 2.24255100  | 0.25741100  | -2.14258200 |
| C | -6.54799300 | -3.56713900 | 0.68236700  | C           | 1.12816700  | -1.48965000 | -2.90569600 |
| H | -4.60676000 | -3.63994900 | 1.61335200  | H           | 1.03154000  | -2.55578000 | -2.67369400 |
| C | -7.30912400 | -3.05864500 | -0.37191600 | H           | 0.13742300  | -1.03281200 | -2.80802700 |
| H | -7.28936700 | -1.84069100 | -2.15259600 | H           | 1.42210800  | -1.40541100 | -3.96292900 |
| H | -7.00930100 | -4.20763700 | 1.42913100  |             |             |             |             |
| H | -8.36416600 | -3.30533100 | -0.45273000 | <b>CP10</b> |             |             |             |
| C | -1.58495200 | 4.37248400  | 0.10851500  | C           | -2.87946300 | -2.11460400 | -0.28139800 |
| C | -1.41390900 | 5.32437600  | 1.12710900  | C           | -3.06325700 | -0.75930600 | -0.05627900 |
| C | -2.44780700 | 4.67645000  | -0.95828200 | C           | -1.89412300 | 0.05440200  | 0.02174400  |
|   |             |             |             | C           | -0.63930500 | -0.58013800 | -0.15025100 |

|   |             |             |             |             |             |             |             |
|---|-------------|-------------|-------------|-------------|-------------|-------------|-------------|
| C | -1.59955800 | -2.68939600 | -0.41347700 | C           | 0.99342200  | 4.67892400  | -0.75979100 |
| C | -1.91483000 | 1.46125500  | 0.29800700  | C           | 2.81647700  | 5.78113500  | 1.04239700  |
| C | 0.57155900  | 0.20479600  | -0.17744900 | H           | 3.32116100  | 3.74604000  | 1.53827900  |
| C | 0.50003600  | 1.61035600  | -0.00908200 | C           | 1.11075900  | 6.06393700  | -0.64355500 |
| C | -0.77075900 | 2.20263700  | 0.28817200  | H           | 0.29994200  | 4.25402800  | -1.47990000 |
| C | 1.71695700  | 2.34710400  | -0.11981000 | C           | 2.01935300  | 6.61904200  | 0.26005500  |
| C | 2.86811800  | 1.63107700  | -0.39994000 | H           | 3.52464000  | 6.20500800  | 1.74901400  |
| C | 2.86098100  | 0.22722100  | -0.55975000 | H           | 0.49617300  | 6.70957800  | -1.26494000 |
| H | -2.86275100 | 1.93244700  | 0.53030400  | H           | 2.10738000  | 7.69804500  | 0.35174100  |
| H | -3.74574800 | -2.75958500 | -0.38420200 | Ni          | 1.34304100  | -2.50538200 | -0.10601100 |
| H | -0.81172200 | 3.26185600  | 0.51427800  | Br          | 3.35625200  | -3.42561700 | 0.54599600  |
| H | 3.80546300  | 2.16020000  | -0.53683700 | H           | 0.92264400  | -3.85783500 | 0.17713900  |
| N | -0.49621000 | -1.92949400 | -0.32680300 | <b>CP14</b> |             |             |             |
| N | 1.73080300  | -0.47524500 | -0.40993900 | C           | 2.98482700  | -2.58819300 | -0.12851900 |
| C | -1.47644900 | -4.16542100 | -0.67154500 | C           | 3.53014400  | -1.32897900 | 0.06308500  |
| H | -2.44200700 | -4.58022100 | -0.97727900 | C           | 2.63981600  | -0.21209600 | 0.02924200  |
| H | -0.73270300 | -4.36443000 | -1.44698400 | C           | 1.25386600  | -0.48388200 | -0.11775400 |
| H | -1.13824000 | -4.68872500 | 0.22960400  | C           | 1.59352400  | -2.77801800 | -0.27745000 |
| C | 4.12863400  | -0.47859900 | -0.93858200 | C           | 3.07460800  | 1.15221700  | 0.05337600  |
| H | 4.48034500  | -1.11060800 | -0.11691200 | C           | 0.30959200  | 0.60604600  | -0.24534200 |
| H | 3.95374700  | -1.15687100 | -1.77868700 | C           | 0.78335100  | 1.94241700  | -0.23503200 |
| H | 4.90358600  | 0.24372900  | -1.21088300 | C           | 2.18708600  | 2.17983600  | -0.07363300 |
| C | -4.44147700 | -0.21651000 | 0.06966000  | C           | -0.16632500 | 2.98342400  | -0.47711400 |
| C | -4.88742200 | 0.84410900  | -0.73765000 | C           | -1.45027000 | 2.59933300  | -0.81324800 |
| C | -5.34506000 | -0.80082600 | 0.97273200  | C           | -1.85033000 | 1.24191200  | -0.81641100 |
| C | -6.19875100 | 1.30868600  | -0.63908700 | H           | 4.13531500  | 1.36217600  | 0.12868000  |
| H | -4.21044300 | 1.28814600  | -1.46174300 | H           | 3.63354700  | -3.45851200 | -0.13535500 |
| C | -6.65379900 | -0.32983500 | 1.07526200  | H           | 2.54757200  | 3.20170500  | -0.10078600 |
| H | -5.00994500 | -1.61550500 | 1.60876500  | H           | -2.19386000 | 3.35384200  | -1.05131100 |
| C | -7.08468600 | 0.72617900  | 0.26976600  | N           | 0.75394800  | -1.74322100 | -0.22612400 |
| H | -6.52991300 | 2.12257300  | -1.27826800 | N           | -1.00062700 | 0.27569800  | -0.45797300 |
| H | -7.33582800 | -0.78710900 | 1.78674400  | C           | 1.02711700  | -4.15443500 | -0.49421700 |
| H | -8.10486200 | 1.09148900  | 0.34795100  | H           | 1.81097000  | -4.85338700 | -0.80187600 |
| C | 1.78866900  | 3.82583000  | 0.02423700  | H           | 0.57022600  | -4.53524600 | 0.42713600  |
| C | 2.70613500  | 4.39598200  | 0.92202100  | H           | 0.24012100  | -4.11789500 | -1.25359900 |

|    |             |             |             |             |             |             |             |
|----|-------------|-------------|-------------|-------------|-------------|-------------|-------------|
| C  | -3.24680800 | 0.89517100  | -1.24674600 | C           | -6.16635400 | -0.49320200 | 0.79044400  |
| H  | -3.31960800 | -0.16284800 | -1.50302000 | H           | -5.04530200 | -2.26844700 | 0.31114400  |
| H  | -3.97308400 | 1.13015700  | -0.46238800 | C           | -5.01631100 | 1.14597400  | 2.13836400  |
| H  | -3.51001600 | 1.49227400  | -2.12804500 | H           | -3.02344300 | 0.63376200  | 2.75492000  |
| C  | 4.99651500  | -1.18631500 | 0.26677800  | C           | -6.15840900 | 0.74502400  | 1.44062500  |
| C  | 5.51539300  | -0.49262500 | 1.37335600  | H           | -7.05004000 | -0.81737000 | 0.24706000  |
| C  | 5.89410000  | -1.79261400 | -0.62761800 | H           | -5.00509400 | 2.09817900  | 2.66322400  |
| C  | 6.89262500  | -0.40703200 | 1.57657400  | H           | -7.03658900 | 1.38467200  | 1.41309600  |
| H  | 4.83430300  | -0.03908900 | 2.08795800  | C           | -0.58047200 | -2.55034300 | 2.77688200  |
| C  | 7.27119200  | -1.70064500 | -0.42660300 | H           | -0.69404400 | -2.42406200 | 3.86403200  |
| H  | 5.50641400  | -2.32182400 | -1.49376400 | H           | -0.86235700 | -3.57914700 | 2.53088100  |
| C  | 7.77489200  | -1.00803600 | 0.67612500  | H           | 0.48286000  | -2.42186500 | 2.54715200  |
| H  | 7.27602600  | 0.12473300  | 2.44315600  | H           | -1.20600300 | -0.50683700 | 2.23972700  |
| H  | 7.95038400  | -2.16795900 | -1.13437000 |             |             |             |             |
| H  | 8.84758000  | -0.93798500 | 0.83370500  | <b>CP11</b> |             |             |             |
| C  | 0.18361000  | 4.42757500  | -0.41754000 | C           | 1.38391400  | -0.49861000 | 0.00044100  |
| C  | -0.13805000 | 5.27694800  | -1.48892700 | C           | 2.40112400  | 0.37628500  | -0.00041900 |
| C  | 0.79061600  | 4.98222100  | 0.72218800  | H           | 2.19568400  | 1.44678100  | -0.00143300 |
| C  | 0.14621400  | 6.64099400  | -1.42609900 | H           | 1.62975800  | -1.56177600 | 0.00130600  |
| H  | -0.59655000 | 4.85853300  | -2.38061200 | C           | -0.05802200 | -0.20498800 | 0.00025400  |
| C  | 1.06770500  | 6.34763800  | 0.78639200  | C           | -0.96757000 | -1.27769500 | 0.00000300  |
| H  | 1.02511900  | 4.34270800  | 1.56859600  | C           | -0.58488300 | 1.10091000  | 0.00033700  |
| C  | 0.74908700  | 7.18073500  | -0.28823800 | C           | -2.34521700 | -1.06134700 | -0.00025400 |
| H  | -0.10119900 | 7.28130300  | -2.26834400 | H           | -0.58279500 | -2.29523200 | -0.00002600 |
| H  | 1.52791800  | 6.76143300  | 1.67954800  | C           | -1.95962400 | 1.31901900  | 0.00008200  |
| H  | 0.96849600  | 8.24366300  | -0.23854800 | H           | 0.08651500  | 1.95479200  | 0.00067900  |
| Ni | -1.35345000 | -1.76408100 | -0.03025300 | C           | -2.84909800 | 0.23971200  | -0.00023000 |
| Br | -2.20053600 | -2.54326700 | -2.18724900 | H           | -3.02416900 | -1.91020100 | -0.00046700 |
| C  | -1.44713300 | -1.55232400 | 2.04553400  | H           | -2.34098300 | 2.33700600  | 0.00016300  |
| C  | -2.73750700 | -1.85356300 | 1.59978300  | H           | -3.92170500 | 0.41355200  | -0.00041600 |
| H  | -1.42203200 | -3.17931200 | 0.15336500  | C           | 3.85180100  | -0.00729500 | -0.00014400 |
| H  | -3.03152200 | -2.90113000 | 1.60536200  | H           | 3.98096400  | -1.09493500 | 0.00083500  |
| C  | -3.88040300 | -0.92036900 | 1.52089200  | H           | 4.37104400  | 0.39623700  | -0.88065600 |
| C  | -5.04343500 | -1.31543100 | 0.83334000  | H           | 4.37113300  | 0.39782000  | 0.87958800  |
| C  | -3.89140800 | 0.32148000  | 2.18130400  | <b>TS6</b>  |             |             |             |
|    |             |             |             | C           | 1.46089600  | -2.95240000 | -0.95374100 |

|   |             |             |             |    |             |             |             |
|---|-------------|-------------|-------------|----|-------------|-------------|-------------|
| C | 2.40456400  | -1.95710100 | -0.75304800 | H  | 7.61695500  | -3.31096900 | -0.89944700 |
| C | 1.92695000  | -0.63267200 | -0.52202300 | C  | 1.09222600  | 4.52792200  | 0.12116000  |
| C | 0.52081700  | -0.44759200 | -0.44291200 | C  | 0.88008800  | 5.62245500  | -0.73311400 |
| C | 0.07890900  | -2.68217900 | -0.87379600 | C  | 2.04123800  | 4.65136600  | 1.15025100  |
| C | 2.78007700  | 0.51515300  | -0.43898100 | C  | 1.60334900  | 6.80383100  | -0.56949200 |
| C | -0.02397600 | 0.88195200  | -0.25379300 | H  | 0.15720300  | 5.53568700  | -1.53959300 |
| C | 0.85697400  | 1.99240100  | -0.16253900 | C  | 2.75841000  | 5.83591300  | 1.31705500  |
| C | 2.26883300  | 1.76688800  | -0.26976100 | H  | 2.20022100  | 3.82227000  | 1.83398900  |
| C | 0.28089600  | 3.29131200  | -0.03672900 | C  | 2.54407600  | 6.91459700  | 0.45629400  |
| C | -1.10022800 | 3.38161700  | -0.08183800 | H  | 1.43313200  | 7.63672600  | -1.24617100 |
| C | -1.91519100 | 2.23586300  | -0.17745300 | H  | 3.48131300  | 5.91752600  | 2.12421900  |
| H | 3.84984300  | 0.38077400  | -0.55157800 | H  | 3.10582300  | 7.83562300  | 0.58508000  |
| H | 1.78696900  | -3.96960100 | -1.14688700 | Ni | -2.40832400 | -0.76464800 | -0.27546500 |
| H | 2.93396500  | 2.62233700  | -0.25082100 | Br | -3.35592200 | -0.56299900 | -2.50585400 |
| H | -1.57801900 | 4.35325400  | -0.00830500 | C  | -2.74434200 | -0.75732900 | 1.83438800  |
| N | -0.36854800 | -1.45948100 | -0.58934300 | C  | -3.83545700 | -1.39626300 | 1.24603000  |
| N | -1.38310100 | 1.00893600  | -0.22313600 | H  | -3.03974500 | -2.05226700 | -0.42624300 |
| C | -0.93095000 | -3.77244900 | -1.10825500 | H  | -3.89262700 | -2.47896900 | 1.33437600  |
| H | -1.45346300 | -4.01694300 | -0.17666800 | H  | -2.83425300 | 0.31313100  | 2.01127700  |
| H | -1.68516300 | -3.43221200 | -1.82469900 | C  | -1.64168700 | -1.40386900 | 2.57193500  |
| H | -0.45089300 | -4.68073500 | -1.48461900 | C  | -0.68455100 | -0.59223200 | 3.20957300  |
| C | -3.41055700 | 2.37985900  | -0.21445800 | C  | -1.50083500 | -2.79959300 | 2.69711800  |
| H | -3.69296200 | 3.40210000  | -0.48359100 | C  | 0.37134700  | -1.14556700 | 3.93230700  |
| H | -3.83377600 | 1.67789700  | -0.94048600 | H  | -0.77850200 | 0.48908400  | 3.13671500  |
| H | -3.84892400 | 2.16329700  | 0.76759300  | C  | -0.44547400 | -3.35329300 | 3.41785800  |
| C | 3.85211800  | -2.29640200 | -0.79972000 | H  | -2.22827400 | -3.46036800 | 2.23458600  |
| C | 4.71006300  | -1.97439800 | 0.26566200  | C  | 0.49960300  | -2.53152200 | 4.03932300  |
| C | 4.37752800  | -2.99637900 | -1.89815700 | H  | 1.09203500  | -0.49164800 | 4.41716300  |
| C | 6.05561300  | -2.34012300 | 0.22999300  | H  | -0.36379300 | -4.43419200 | 3.50142700  |
| H | 4.31243500  | -1.45626200 | 1.13376800  | H  | 1.31893600  | -2.96706200 | 4.60466300  |
| C | 5.72475800  | -3.35591900 | -1.93526800 | C  | -5.16620900 | -0.74419500 | 0.96748200  |
| H | 3.72673300  | -3.24202700 | -2.73283400 | H  | -5.10371900 | 0.34598100  | 1.00396200  |
| C | 6.56797200  | -3.02923500 | -0.87140700 | H  | -5.54422700 | -1.02666100 | -0.01972900 |
| H | 6.70267600  | -2.09172800 | 1.06695400  | H  | -5.90084300 | -1.06869300 | 1.71918200  |
| H | 6.11573700  | -3.88892500 | -2.79767700 |    |             |             |             |

**CP12**

|   |             |             |             |    |             |             |             |
|---|-------------|-------------|-------------|----|-------------|-------------|-------------|
| C | 3.40502700  | -1.90761300 | -0.43883700 | H  | 8.23264600  | -0.30020400 | -0.51146400 |
| C | 3.60400900  | -0.58360500 | -0.08530600 | H  | 8.47782200  | 0.93111900  | 1.63653600  |
| C | 2.48787000  | 0.30049600  | -0.20620100 | C  | -0.95607500 | 4.25999000  | -0.75951200 |
| C | 1.24308300  | -0.27053100 | -0.57523300 | C  | -1.38945300 | 5.04634200  | -1.83938400 |
| C | 2.14930200  | -2.37946200 | -0.88732400 | C  | -0.58543800 | 4.90076500  | 0.43493900  |
| C | 2.57736700  | 1.72381200  | -0.06145400 | C  | -1.44176700 | 6.43595600  | -1.73169000 |
| C | 0.07886600  | 0.57961200  | -0.68139800 | H  | -1.66886400 | 4.56370400  | -2.77191800 |
| C | 0.20978500  | 1.98613100  | -0.58524600 | C  | -0.64618700 | 6.28989400  | 0.54353300  |
| C | 1.49718500  | 2.53127400  | -0.26990900 | H  | -0.27303200 | 4.30441700  | 1.28740300  |
| C | -0.94697600 | 2.77738000  | -0.87068200 | C  | -1.07099100 | 7.06185800  | -0.53998400 |
| C | -2.08856300 | 2.11439000  | -1.28820100 | H  | -1.77042600 | 7.02930900  | -2.58048000 |
| C | -2.16194200 | 0.70540600  | -1.30406300 | H  | -0.36683700 | 6.76867100  | 1.47806500  |
| H | 3.54172300  | 2.16406500  | 0.16555700  | H  | -1.11438900 | 8.14411000  | -0.45522800 |
| H | 4.23061700  | -2.60939400 | -0.37371300 | Ni | -1.15247400 | -1.98520400 | -0.61334700 |
| H | 1.61057500  | 3.60796800  | -0.21876700 | Br | -1.54609900 | -4.24292200 | -1.08824300 |
| H | -2.97641000 | 2.68175000  | -1.54772400 | C  | -1.68035700 | -2.86330100 | 3.45656700  |
| N | 1.07937500  | -1.57944900 | -0.91487200 | C  | -1.11221000 | -2.47924900 | 2.07568200  |
| N | -1.11371300 | -0.03451700 | -0.93082800 | H  | -2.41142400 | -3.67484400 | 3.36146100  |
| C | 2.00763900  | -3.78962500 | -1.38282100 | H  | -0.88099400 | -3.20818800 | 4.12421200  |
| H | 1.93409200  | -3.79202000 | -2.47804500 | C  | -2.19906600 | -2.02836300 | 1.08378800  |
| H | 2.87236900  | -4.39615200 | -1.09772100 | H  | -2.18151600 | -2.01489400 | 3.93499500  |
| H | 1.08495600  | -4.24768100 | -1.01484600 | H  | -0.59750700 | -3.34907000 | 1.65578600  |
| C | -3.41287600 | 0.01688700  | -1.77179200 | H  | -0.34884000 | -1.69941900 | 2.20729700  |
| H | -3.39054100 | -1.04506300 | -1.51786100 | H  | -2.89167000 | -2.85225600 | 0.90357400  |
| H | -4.30548100 | 0.47715300  | -1.33971700 | C  | -2.96607000 | -0.81403900 | 1.48392500  |
| H | -3.48239400 | 0.10334400  | -2.86485800 | C  | -4.36682600 | -0.78591300 | 1.32970100  |
| C | 4.94188800  | -0.13303900 | 0.38075400  | C  | -2.36436000 | 0.32049600  | 2.06658200  |
| C | 5.09326400  | 0.56487800  | 1.59141000  | C  | -5.12667100 | 0.31618600  | 1.72127500  |
| C | 6.09146400  | -0.44348500 | -0.36450500 | H  | -4.86170900 | -1.65481100 | 0.90108400  |
| C | 6.35849500  | 0.94223900  | 2.04071300  | C  | -3.11947300 | 1.42368200  | 2.46161400  |
| H | 4.21681000  | 0.78967100  | 2.19255900  | H  | -1.28768400 | 0.33699300  | 2.21300800  |
| C | 7.35543000  | -0.05941000 | 0.08276800  | C  | -4.50644600 | 1.43221200  | 2.28835900  |
| H | 5.98743900  | -0.97284900 | -1.30759000 | H  | -6.20665600 | 0.29851400  | 1.59420700  |
| C | 7.49298300  | 0.63414100  | 1.28680000  | H  | -2.62416000 | 2.28108100  | 2.91187200  |
| H | 6.45807300  | 1.47153200  | 2.98444700  | H  | -5.09496600 | 2.29085600  | 2.60080100  |

|                       |             |             |             |    |             |             |             |
|-----------------------|-------------|-------------|-------------|----|-------------|-------------|-------------|
| <b>Br<sup>-</sup></b> |             |             |             | H  | 5.56692700  | -2.60487500 | -1.35609300 |
| Br                    | 0.00000000  | 0.00000000  | 0.00000000  | C  | 7.61447200  | -1.42862900 | 1.09209200  |
| <b>CP15</b>           |             |             |             | H  | 6.96152700  | -0.32898600 | 2.82936700  |
| C                     | 2.91045300  | -2.80327300 | -0.32691500 | H  | 7.95598400  | -2.54463300 | -0.72233600 |
| C                     | 3.46682200  | -1.57889800 | 0.00645600  | H  | 8.66397900  | -1.40247900 | 1.36994100  |
| C                     | 2.60298300  | -0.44041200 | -0.04911800 | C  | 0.24312300  | 4.27537000  | -0.25509700 |
| C                     | 1.23685900  | -0.66184100 | -0.34203300 | C  | -0.07479200 | 5.23091700  | -1.23566400 |
| C                     | 1.54173600  | -2.95931300 | -0.62412800 | C  | 0.84772500  | 4.70351300  | 0.94028600  |
| C                     | 3.06319100  | 0.90872700  | 0.09671300  | C  | 0.21836400  | 6.57833700  | -1.03182900 |
| C                     | 0.34254800  | 0.45994700  | -0.46009500 | H  | -0.52908600 | 4.91130800  | -2.16948500 |
| C                     | 0.82057100  | 1.78004000  | -0.28740400 | C  | 1.12647500  | 6.05394600  | 1.14611100  |
| C                     | 2.21369800  | 1.96989500  | -0.01724000 | H  | 1.06880000  | 3.98247600  | 1.72215600  |
| C                     | -0.11192800 | 2.85118300  | -0.46697700 | C  | 0.81761400  | 6.99322200  | 0.15957300  |
| C                     | -1.39469500 | 2.51416900  | -0.87450800 | H  | -0.01988300 | 7.30360400  | -1.80422600 |
| C                     | -1.80036700 | 1.17506200  | -1.03769400 | H  | 1.57962300  | 6.37304400  | 2.08010700  |
| H                     | 4.11985800  | 1.07926300  | 0.26301900  | H  | 1.04083900  | 8.04389700  | 0.31958500  |
| H                     | 3.53559700  | -3.68935000 | -0.32649800 | Ni | -1.23049000 | -1.79379100 | -0.64995900 |
| H                     | 2.59724800  | 2.98002900  | 0.06051100  | C  | -1.90774000 | -3.55129000 | -0.37560900 |
| H                     | -2.12451100 | 3.29909500  | -1.04073500 | C  | -3.17214900 | -2.77305800 | -0.32132700 |
| N                     | 0.70640300  | -1.90807000 | -0.58171900 | H  | -1.58783300 | -4.01091600 | 0.56144800  |
| N                     | -0.94902000 | 0.16964700  | -0.79481700 | H  | -1.78831700 | -4.21272600 | -1.23283800 |
| C                     | 1.03616000  | -4.32628600 | -0.98832100 | C  | -3.93283100 | -2.74586200 | 1.02263300  |
| H                     | 1.87378500  | -4.98376400 | -1.23295400 | H  | -2.92472800 | -1.64147800 | -0.53615300 |
| H                     | 0.48541300  | -4.78183300 | -0.15917200 | H  | -3.83966000 | -2.97268100 | -1.16654900 |
| H                     | 0.36757000  | -4.27820800 | -1.85053100 | H  | -4.34887900 | -3.75041900 | 1.16823100  |
| C                     | -3.20700000 | 0.86089400  | -1.46801300 | H  | -3.21300100 | -2.58228700 | 1.83297700  |
| H                     | -3.22013100 | 0.05506400  | -2.20851000 | C  | -5.03317500 | -1.70779100 | 1.08447000  |
| H                     | -3.82191600 | 0.55172700  | -0.61332800 | C  | -6.23959500 | -1.90296900 | 0.39612600  |
| H                     | -3.67973300 | 1.74048800  | -1.91225100 | C  | -4.86098100 | -0.52244900 | 1.81301600  |
| C                     | 4.90062100  | -1.49333300 | 0.37254900  | C  | -7.24389900 | -0.93497300 | 0.42717300  |
| C                     | 5.31190800  | -0.84489200 | 1.55099800  | H  | -6.40054900 | -2.82598200 | -0.15741000 |
| C                     | 5.86933400  | -2.11393000 | -0.43523100 | C  | -5.86572100 | 0.44848500  | 1.84787500  |
| C                     | 6.65900800  | -0.81957700 | 1.90889800  | H  | -3.94146400 | -0.36665100 | 2.37436500  |
| H                     | 4.57233000  | -0.38987600 | 2.20371200  | C  | -7.05861900 | 0.24513300  | 1.15196500  |
| C                     | 7.21682100  | -2.07366800 | -0.08113500 | H  | -8.17508700 | -1.10622800 | -0.10552100 |

|            |             |             |             |    |             |             |             |
|------------|-------------|-------------|-------------|----|-------------|-------------|-------------|
| H          | -5.72065900 | 1.35531700  | 2.42867200  | H  | 5.64961000  | -2.22850000 | -1.27826100 |
| H          | -7.84397900 | 0.99479000  | 1.18352700  | C  | 7.40811800  | -1.16197400 | 1.43090900  |
| <b>TS7</b> |             |             |             | H  | 6.54679800  | -0.23980000 | 3.18060700  |
| C          | 2.93004000  | -2.63047600 | -0.53729400 | H  | 7.96708600  | -2.10672800 | -0.42628200 |
| C          | 3.38334900  | -1.42335100 | -0.03189700 | H  | 8.42645000  | -1.10824700 | 1.80434400  |
| C          | 2.46112500  | -0.33044500 | -0.06280500 | C  | -0.08838400 | 4.28105400  | -0.31868900 |
| C          | 1.13255200  | -0.60303700 | -0.46663000 | C  | -0.34771100 | 5.24243900  | -1.31067500 |
| C          | 1.59824600  | -2.82227800 | -0.96023700 | C  | 0.37940500  | 4.70900100  | 0.93656600  |
| C          | 2.83615700  | 1.02722400  | 0.19831200  | C  | -0.13022400 | 6.59605100  | -1.05830000 |
| C          | 0.19346100  | 0.47859200  | -0.59331500 | H  | -0.69572700 | 4.92392200  | -2.28945000 |
| C          | 0.59406500  | 1.81223400  | -0.34568300 | C  | 0.58248400  | 6.06494100  | 1.18945400  |
| C          | 1.94758100  | 2.05220900  | 0.05504700  | H  | 0.55310100  | 3.98197600  | 1.72492500  |
| C          | -0.36251800 | 2.84851200  | -0.58719600 | C  | 0.33328900  | 7.01061100  | 0.19219300  |
| C          | -1.58749700 | 2.46858500  | -1.11524800 | H  | -0.32142500 | 7.32631500  | -1.83903300 |
| C          | -1.93268700 | 1.11825900  | -1.32064400 | H  | 0.92992000  | 6.38310200  | 2.16803000  |
| H          | 3.86460700  | 1.23828100  | 0.46549200  | H  | 0.49752800  | 8.06580400  | 0.38956700  |
| H          | 3.60979400  | -3.47438800 | -0.59200300 | Ni | -1.36103100 | -1.75830500 | -0.82562900 |
| H          | 2.27279000  | 3.07428100  | 0.20652200  | C  | -1.68452300 | -3.79184000 | -0.60902400 |
| H          | -2.33109400 | 3.22700400  | -1.33405500 | C  | -2.93530600 | -3.29883600 | -0.26266500 |
| N          | 0.68495300  | -1.84577000 | -0.84342100 | H  | -0.99723700 | -4.10894200 | 0.17095700  |
| N          | -1.05880900 | 0.14273600  | -1.02835200 | H  | -1.53301400 | -4.20214900 | -1.60232100 |
| C          | 1.24018900  | -4.14613400 | -1.58204500 | C  | -3.42379800 | -3.14557600 | 1.16270900  |
| H          | 2.13173700  | -4.59064200 | -2.03264600 | H  | -2.76767500 | -1.44851000 | -0.72648200 |
| H          | 0.86219800  | -4.86321600 | -0.84526600 | H  | -3.71259000 | -3.28672000 | -1.02467100 |
| H          | 0.48960500  | -4.02253900 | -2.36435600 | H  | -3.90688400 | -4.10380200 | 1.41062300  |
| C          | -3.29744300 | 0.77178800  | -1.84674300 | H  | -2.56826700 | -3.04610900 | 1.83922400  |
| H          | -3.23793100 | -0.00800200 | -2.61117800 | C  | -4.41112700 | -2.01479100 | 1.37616600  |
| H          | -3.94068100 | 0.40179600  | -1.03925300 | C  | -5.71570700 | -2.10153200 | 0.87086400  |
| H          | -3.77436700 | 1.65415200  | -2.28161100 | C  | -4.03275800 | -0.85977600 | 2.07190200  |
| C          | 4.77427300  | -1.29868300 | 0.46441100  | C  | -6.61757800 | -1.05058900 | 1.04419800  |
| C          | 5.04570700  | -0.72913600 | 1.72149000  | H  | -6.03594000 | -3.00168900 | 0.34970600  |
| C          | 5.84279600  | -1.80205600 | -0.29777400 | C  | -4.93432800 | 0.19210400  | 2.25099000  |
| C          | 6.35305400  | -0.66813300 | 2.20157700  | H  | -3.02968000 | -0.78789800 | 2.48711900  |
| H          | 4.22817400  | -0.36396700 | 2.33664400  | C  | -6.22798200 | 0.10061000  | 1.73357800  |
| C          | 7.15005500  | -1.72662000 | 0.17978900  | H  | -7.62710900 | -1.13577800 | 0.65215400  |

|             |             |             |             |    |             |             |             |
|-------------|-------------|-------------|-------------|----|-------------|-------------|-------------|
| H           | -4.62932700 | 1.07665600  | 2.80344800  | H  | -0.41161600 | 5.03616100  | 1.00114200  |
| H           | -6.93282400 | 0.91440100  | 1.87779700  | C  | 2.54729700  | 6.69907100  | 0.77479800  |
| <b>CP16</b> |             |             |             | H  | 4.31378900  | 5.95098400  | -0.21169300 |
| C           | -0.50698800 | 3.07051600  | -1.08876000 | H  | 0.63933100  | 7.17520600  | 1.66197300  |
| C           | 0.69282900  | 3.00993400  | -0.39550200 | H  | 3.00807700  | 7.63898700  | 1.06386100  |
| C           | 1.23866300  | 1.71091000  | -0.15719200 | C  | 4.26718600  | -2.53009600 | 0.58375400  |
| C           | 0.51087800  | 0.59274900  | -0.63404700 | C  | 4.43442100  | -3.61252200 | 1.46489800  |
| C           | -1.18262200 | 1.91400100  | -1.52355200 | C  | 5.39996700  | -1.80040400 | 0.18077000  |
| C           | 2.45979700  | 1.48068000  | 0.55656900  | C  | 5.69998800  | -3.94508000 | 1.94501400  |
| C           | 1.07820700  | -0.72771900 | -0.51660200 | H  | 3.56580300  | -4.17760600 | 1.79172000  |
| C           | 2.35655800  | -0.90372600 | 0.06365400  | C  | 6.66588400  | -2.14557200 | 0.65191900  |
| C           | 2.99633700  | 0.23171500  | 0.65924700  | H  | 5.29355400  | -0.98518600 | -0.52907600 |
| C           | 2.91918600  | -2.21807200 | 0.05019900  | C  | 6.81839700  | -3.21368500 | 1.53885600  |
| C           | 2.15536000  | -3.22887500 | -0.51535600 | H  | 5.81224600  | -4.77499600 | 2.63636600  |
| C           | 0.87224200  | -2.99772400 | -1.04675800 | H  | 7.53422800  | -1.58382500 | 0.32039100  |
| H           | 2.95623900  | 2.32308700  | 1.02259200  | H  | 7.80484200  | -3.47717300 | 1.90875300  |
| H           | -0.92545600 | 4.03868300  | -1.34090300 | Ni | -1.49285000 | -1.21615200 | -1.34762200 |
| H           | 3.91930200  | 0.08140300  | 1.20608000  | C  | -3.52707300 | -1.10583400 | -1.94399900 |
| H           | 2.56537700  | -4.23044800 | -0.58047100 | C  | -3.47705400 | -0.77381500 | -0.61092700 |
| N           | -0.70316500 | 0.68836700  | -1.26101200 | H  | -3.84055900 | -2.09721500 | -2.25573300 |
| N           | 0.34147800  | -1.76375800 | -1.02648100 | H  | -3.50285700 | -0.34883300 | -2.72041500 |
| C           | -2.43086400 | 2.07276600  | -2.35197100 | C  | -3.84266000 | -1.69820800 | 0.52767700  |
| H           | -2.37455500 | 1.45774600  | -3.25511500 | H  | -1.86969900 | -2.61032900 | -1.29908000 |
| H           | -3.33543400 | 1.79385900  | -1.80183800 | H  | -3.36435800 | 0.27129100  | -0.32866400 |
| H           | -2.54904000 | 3.11370400  | -2.66134600 | H  | -3.94488000 | -2.72280900 | 0.15362000  |
| C           | 0.11418900  | -4.14185700 | -1.66116600 | H  | -3.03799800 | -1.70264800 | 1.27316400  |
| H           | -0.68136100 | -4.48628800 | -0.99007800 | C  | -5.13329100 | -1.22450800 | 1.18426400  |
| H           | -0.35536000 | -3.84423700 | -2.60207600 | C  | -5.10819500 | -0.55733300 | 2.41514000  |
| H           | 0.78539000  | -4.98351100 | -1.85142400 | C  | -6.36625400 | -1.43123000 | 0.54997700  |
| C           | 1.35721900  | 4.26624300  | 0.02973600  | C  | -6.29210100 | -0.11060500 | 3.00544700  |
| C           | 2.69655600  | 4.53761700  | -0.30240800 | H  | -4.15914200 | -0.39871500 | 2.92307500  |
| C           | 0.62145900  | 5.23728900  | 0.73093300  | C  | -7.55013500 | -0.98696000 | 1.13852200  |
| C           | 3.28319800  | 5.74809300  | 0.06433900  | H  | -6.40194800 | -1.95130800 | -0.40485100 |
| H           | 3.26830700  | 3.81524800  | -0.87777700 | C  | -7.51537900 | -0.32401400 | 2.36788900  |
| C           | 1.21591200  | 6.44036900  | 1.10794700  | H  | -6.25840000 | 0.39700000  | 3.96535600  |



|            |             |             |             |    |             |             |             |
|------------|-------------|-------------|-------------|----|-------------|-------------|-------------|
| H          | -8.49950000 | -1.16216900 | 0.64040600  | H  | -1.47706800 | 4.68049900  | 0.76674900  |
| H          | -8.43740300 | 0.01923900  | 2.82806100  | C  | 1.06204300  | 6.92438100  | 0.46533300  |
| <b>TS8</b> |             |             |             | H  | 2.95575900  | 6.52750900  | -0.48828200 |
| C          | -1.12128300 | 2.65145000  | -1.25340000 | H  | -0.91095800 | 7.02146100  | 1.33237600  |
| C          | 0.04553500  | 2.87759200  | -0.53932700 | H  | 1.30985900  | 7.95248100  | 0.71218000  |
| C          | 0.85171400  | 1.73583000  | -0.23156300 | C  | 4.69113600  | -1.75899300 | 0.67474600  |
| C          | 0.37919700  | 0.47025600  | -0.64923600 | C  | 5.06140600  | -2.75299800 | 1.59710200  |
| C          | -1.53574800 | 1.35602300  | -1.62602700 | C  | 5.65649400  | -0.82557300 | 0.25701500  |
| C          | 2.09131200  | 1.79469100  | 0.48554100  | C  | 6.35924100  | -2.80034000 | 2.10338900  |
| C          | 1.21150100  | -0.69443200 | -0.49770500 | H  | 4.32170000  | -3.47361600 | 1.93490700  |
| C          | 2.49310300  | -0.57910100 | 0.08869000  | C  | 6.95737700  | -0.88528100 | 0.75495000  |
| C          | 2.87463100  | 0.68803700  | 0.63961300  | H  | 5.39749200  | -0.07503200 | -0.48419800 |
| C          | 3.31606200  | -1.74826800 | 0.11898800  | C  | 7.31015800  | -1.86790500 | 1.68273800  |
| C          | 2.78509500  | -2.91116200 | -0.42131500 | H  | 6.62736900  | -3.56498900 | 2.82641300  |
| C          | 1.48956300  | -2.96494900 | -0.97224400 | H  | 7.69737700  | -0.16783200 | 0.41265100  |
| H          | 2.40206500  | 2.74100200  | 0.91163800  | H  | 8.32266400  | -1.90897500 | 2.07326200  |
| H          | -1.72231400 | 3.49658800  | -1.57279600 | Ni | -1.21040900 | -1.70525600 | -1.25181800 |
| H          | 3.80543900  | 0.75668500  | 1.18965500  | C  | -3.14360900 | -2.64220500 | -1.47448200 |
| H          | 3.39470200  | -3.80735000 | -0.45336400 | C  | -3.22865100 | -1.53926000 | -0.64567600 |
| N          | -0.82797100 | 0.27702500  | -1.26796800 | H  | -3.22527700 | -3.64923000 | -1.07652300 |
| N          | 0.71286900  | -1.87073400 | -0.99170000 | H  | -3.31220900 | -2.55157100 | -2.54569500 |
| C          | -2.75241600 | 1.20913400  | -2.50284200 | C  | -3.31214800 | -1.62973700 | 0.86516300  |
| H          | -2.79451700 | 0.22288400  | -2.96875000 | H  | -1.32367400 | -3.15492500 | -1.28016500 |
| H          | -3.68273300 | 1.38563800  | -1.94885600 | H  | -3.53620400 | -0.59394100 | -1.07385100 |
| H          | -2.71621000 | 1.95780900  | -3.30135600 | H  | -3.01085000 | -2.63194000 | 1.19239700  |
| C          | 0.98709000  | -4.25389600 | -1.56156300 | H  | -2.61079000 | -0.91763100 | 1.31830500  |
| H          | 0.28757200  | -4.74774000 | -0.87635300 | C  | -4.72272700 | -1.31194300 | 1.34492500  |
| H          | 0.45975400  | -4.07639400 | -2.50250700 | C  | -5.04258800 | -0.03601000 | 1.82505900  |
| H          | 1.81763600  | -4.94021200 | -1.74608600 | C  | -5.73049600 | -2.28393300 | 1.28405400  |
| C          | 0.42337800  | 4.26424300  | -0.17040800 | C  | -6.34224500 | 0.26426300  | 2.23789400  |
| C          | 1.67708200  | 4.79943900  | -0.51518000 | H  | -4.26659100 | 0.72416700  | 1.89169100  |
| C          | -0.50800600 | 5.08541500  | 0.48800000  | C  | -7.02912700 | -1.98736000 | 1.69795200  |
| C          | 1.98949900  | 6.12200100  | -0.20300700 | H  | -5.49702400 | -3.28212900 | 0.91984500  |
| H          | 2.39412600  | 4.19099400  | -1.05869100 | C  | -7.33867100 | -0.71105100 | 2.17430200  |
| C          | -0.18648400 | 6.40284400  | 0.81098600  | H  | -6.57341000 | 1.25606000  | 2.61642600  |

|             |             |             |             |    |             |             |             |
|-------------|-------------|-------------|-------------|----|-------------|-------------|-------------|
| H           | -7.79795900 | -2.75352700 | 1.65329400  | H  | -0.02246800 | 5.05507400  | -1.29520900 |
| H           | -8.34907800 | -0.48086400 | 2.49947300  | C  | -2.99255600 | 6.60671800  | -0.70904300 |
| <b>CP17</b> |             |             |             | H  | -4.59409700 | 5.79958800  | 0.48961900  |
| C           | 0.39952800  | 3.10820400  | 0.78228200  | H  | -1.22851200 | 7.14844900  | -1.82665900 |
| C           | -0.86919500 | 2.99910500  | 0.23282600  | H  | -3.52136500 | 7.52638100  | -0.94125000 |
| C           | -1.39036400 | 1.67900800  | 0.06000400  | C  | -4.28668800 | -2.70296900 | -0.38881300 |
| C           | -0.57199100 | 0.59206800  | 0.44694200  | C  | -4.48663100 | -3.78218900 | -1.26698800 |
| C           | 1.17354000  | 1.98355700  | 1.12933700  | C  | -5.40874800 | -2.03646700 | 0.13508400  |
| C           | -2.67692100 | 1.39571400  | -0.50560900 | C  | -5.77550400 | -4.17326200 | -1.62587800 |
| C           | -1.09746000 | -0.74919900 | 0.40522000  | H  | -3.62791900 | -4.29818400 | -1.68776700 |
| C           | -2.41876400 | -0.98358500 | -0.04328600 | C  | -6.69648200 | -2.43966300 | -0.21552900 |
| C           | -3.16822000 | 0.12437000  | -0.55720600 | H  | -5.27299400 | -1.22459000 | 0.84376400  |
| C           | -2.90944300 | -2.32617700 | 0.01246200  | C  | -6.88303200 | -3.50424800 | -1.10019700 |
| C           | -2.04025900 | -3.30190600 | 0.48239100  | H  | -5.91442700 | -4.99968800 | -2.31658900 |
| C           | -0.73024500 | -2.99678900 | 0.89750100  | H  | -7.55444700 | -1.92596100 | 0.20812500  |
| H           | -3.25946700 | 2.21716900  | -0.90476800 | H  | -7.88697300 | -3.81301600 | -1.37605500 |
| H           | 0.80637900  | 4.09252300  | 0.98628400  | Ni | 1.58115100  | -0.99007000 | 0.99849300  |
| H           | -4.13925100 | -0.06270400 | -0.99952200 | C  | 3.41221200  | -2.16895500 | 0.97571500  |
| H           | -2.38707900 | -4.32586700 | 0.56876500  | C  | 3.45308500  | -0.69370600 | 0.74797000  |
| N           | 0.70975800  | 0.74168200  | 0.91618400  | H  | 3.76828900  | -2.77332000 | 0.13635000  |
| N           | -0.26962900 | -1.73982400 | 0.85023800  | H  | 3.86339800  | -2.49984200 | 1.91376700  |
| C           | 2.50636000  | 2.19504000  | 1.79247300  | C  | 3.83829600  | -0.20852700 | -0.65050700 |
| H           | 2.54260200  | 3.18768300  | 2.24866600  | H  | 2.31486100  | -2.54303700 | 1.07813100  |
| H           | 2.67833900  | 1.44740800  | 2.56966300  | H  | 3.94349700  | -0.14134900 | 1.54854000  |
| H           | 3.32870300  | 2.13460800  | 1.07180100  | H  | 3.22431800  | -0.71761100 | -1.40486500 |
| C           | 0.16987900  | -4.08446900 | 1.42032800  | H  | 3.61261200  | 0.86124600  | -0.73852500 |
| H           | 0.91950600  | -4.36832700 | 0.67056600  | C  | 5.30942300  | -0.44971400 | -0.96003100 |
| H           | 0.69584300  | -3.75932500 | 2.32352700  | C  | 5.70246700  | -1.49888400 | -1.80055600 |
| H           | -0.40398800 | -4.98181900 | 1.66391000  | C  | 6.30164400  | 0.35628700  | -0.38365700 |
| C           | -1.62740400 | 4.22658900  | -0.11114900 | C  | 7.05411100  | -1.74181000 | -2.05710300 |
| C           | -2.92507800 | 4.44869000  | 0.38312200  | H  | 4.94556600  | -2.12138300 | -2.27407300 |
| C           | -1.02119400 | 5.21943600  | -0.90004300 | C  | 7.65199500  | 0.11705000  | -0.63751400 |
| C           | -3.59830800 | 5.63367800  | 0.08914000  | H  | 6.01685700  | 1.18429100  | 0.26298900  |
| H           | -3.39303900 | 3.70898800  | 1.02628400  | C  | 8.03230100  | -0.93555700 | -1.47406000 |
| C           | -1.70357400 | 6.39636900  | -1.20376300 | H  | 7.34027200  | -2.55555800 | -2.71768600 |

|            |             |             |             |    |             |             |             |
|------------|-------------|-------------|-------------|----|-------------|-------------|-------------|
| H          | 8.40753700  | 0.75496200  | -0.18732700 | H  | 1.85308700  | 4.94924900  | 1.20409200  |
| H          | 9.08362100  | -1.12065800 | -1.67441100 | C  | 5.19865500  | 5.05084900  | 0.59602700  |
| <b>TS9</b> |             |             |             | H  | 6.27659000  | 3.63752800  | -0.62622200 |
| C          | 0.60025900  | 3.41159500  | -0.87156300 | H  | 3.85762100  | 6.29669000  | 1.73777700  |
| C          | 1.70308800  | 2.74861300  | -0.35304200 | H  | 6.07842400  | 5.64322000  | 0.82944500  |
| C          | 1.60070000  | 1.33132600  | -0.19933600 | C  | 2.32350200  | -3.86649700 | 0.19793000  |
| C          | 0.39580200  | 0.70900700  | -0.60610900 | C  | 2.01814600  | -4.93682500 | 1.05596600  |
| C          | -0.58485400 | 2.73721500  | -1.22199700 | C  | 3.63466200  | -3.74371600 | -0.29488100 |
| C          | 2.62900000  | 0.51518900  | 0.37281000  | C  | 3.00367000  | -5.85018700 | 1.42737600  |
| C          | 0.27318200  | -0.72693500 | -0.58086600 | H  | 1.01029300  | -5.03797700 | 1.44934000  |
| C          | 1.36512600  | -1.50886600 | -0.13044800 | C  | 4.61426000  | -4.66724700 | 0.06791400  |
| C          | 2.51305200  | -0.84251000 | 0.40946300  | H  | 3.87872600  | -2.94445000 | -0.98870600 |
| C          | 1.24949300  | -2.93061000 | -0.21816200 | C  | 4.30331200  | -5.71827100 | 0.93356900  |
| C          | 0.07520100  | -3.42998200 | -0.75533600 | H  | 2.75628300  | -6.66441600 | 2.10211400  |
| C          | -0.97668500 | -2.59254800 | -1.17963200 | H  | 5.61937600  | -4.56921400 | -0.33165900 |
| H          | 3.50599800  | 0.99655700  | 0.78840100  | H  | 5.06935500  | -6.43327400 | 1.21871200  |
| H          | 0.65402600  | 4.48152000  | -1.03949900 | Ni | -2.26384000 | 0.26398500  | -1.12934500 |
| H          | 3.29823200  | -1.44099200 | 0.85521900  | C  | -4.07056000 | -0.71256500 | -1.09251900 |
| H          | -0.03216300 | -4.50016700 | -0.89691700 | C  | -4.27646800 | 0.39540700  | -0.25832200 |
| N          | -0.68241100 | 1.40745000  | -1.07244700 | H  | -3.08115900 | 1.47533800  | -1.07417400 |
| N          | -0.90263600 | -1.25870700 | -1.05310800 | H  | -4.91808400 | 1.18812600  | -0.64122200 |
| C          | -1.74065700 | 3.51708600  | -1.78611600 | C  | -4.08413300 | 0.44609000  | 1.20808400  |
| H          | -1.41216300 | 4.50793800  | -2.11083000 | C  | -4.62617200 | 1.53503100  | 1.91172300  |
| H          | -2.18847200 | 2.99851500  | -2.63796600 | C  | -3.41780500 | -0.55915100 | 1.93323900  |
| H          | -2.52253500 | 3.65367600  | -1.02896300 | C  | -4.51506100 | 1.61765100  | 3.29874500  |
| C          | -2.16830700 | -3.23827800 | -1.83310700 | H  | -5.14772100 | 2.31769200  | 1.36556300  |
| H          | -2.91251800 | -3.56130800 | -1.09460900 | C  | -3.30564700 | -0.47551700 | 3.31830700  |
| H          | -2.64882500 | -2.56343100 | -2.53940900 | H  | -2.98679200 | -1.41100300 | 1.41561600  |
| H          | -1.85102200 | -4.13432000 | -2.37439300 | C  | -3.85328500 | 0.61240100  | 4.00584900  |
| C          | 2.92407400  | 3.51661300  | -0.00605000 | H  | -4.94770000 | 2.46278700  | 3.82583000  |
| C          | 4.18487500  | 3.15401100  | -0.51235500 | H  | -2.79404600 | -1.26201300 | 3.86550700  |
| C          | 2.82003700  | 4.66445600  | 0.79845100  | H  | -3.76631900 | 0.67255200  | 5.08669000  |
| C          | 5.31143400  | 3.92028400  | -0.21626400 | H  | -3.86387000 | -1.66572200 | -0.61734600 |
| H          | 4.27697700  | 2.29109100  | -1.16560100 | C  | -4.71860100 | -0.75514100 | -2.46008400 |
| C          | 3.95100800  | 5.42011000  | 1.10349300  | H  | -4.10236400 | -1.25916600 | -3.21103500 |

|             |             |             |             |    |             |             |             |
|-------------|-------------|-------------|-------------|----|-------------|-------------|-------------|
| H           | -5.67186400 | -1.29967500 | -2.41108900 | H  | -4.99920400 | -1.84252300 | 1.27279100  |
| H           | -4.93032700 | 0.25334800  | -2.83066000 | C  | -7.16989300 | 0.69990900  | 0.64324100  |
| <b>CP18</b> |             |             |             | H  | -6.75487000 | 2.39434200  | -0.62560900 |
| C           | -3.04829000 | -1.91416900 | -0.83049700 | H  | -7.29181300 | -1.09885000 | 1.82801700  |
| C           | -3.20803700 | -0.62599400 | -0.34009600 | H  | -8.17705100 | 1.02557600  | 0.88604000  |
| C           | -2.03336200 | 0.18109500  | -0.22987200 | C  | 1.56337600  | 4.02645600  | -0.16984900 |
| C           | -0.80388200 | -0.38723200 | -0.63904600 | C  | 2.62792600  | 4.52002400  | 0.60346000  |
| C           | -1.78967500 | -2.43330500 | -1.19165900 | C  | 0.61201200  | 4.93198800  | -0.67199300 |
| C           | -2.02422700 | 1.51619000  | 0.29121200  | C  | 2.72770500  | 5.88188700  | 0.88428700  |
| C           | 0.39063900  | 0.41881500  | -0.66822200 | H  | 3.36586700  | 3.82936100  | 1.00240000  |
| C           | 0.32613100  | 1.78335600  | -0.29855300 | C  | 0.72289600  | 6.29515400  | -0.40064300 |
| C           | -0.89641200 | 2.28232500  | 0.25833100  | H  | -0.19583200 | 4.57291000  | -1.30298900 |
| C           | 1.49856000  | 2.57909600  | -0.49234500 | C  | 1.77635000  | 6.77253600  | 0.38221100  |
| C           | 2.59900900  | 1.95200300  | -1.05569200 | H  | 3.54851100  | 6.24713200  | 1.49449100  |
| C           | 2.59366800  | 0.58131500  | -1.38671900 | H  | -0.01057500 | 6.98529000  | -0.80717800 |
| H           | -2.93714700 | 1.91440500  | 0.71733100  | H  | 1.85781400  | 7.83407100  | 0.59636500  |
| H           | -3.92226300 | -2.54049600 | -0.97116700 | Ni | 1.18899100  | -2.22160800 | -1.02823800 |
| H           | -0.91436000 | 3.28957800  | 0.65668700  | C  | 3.16644300  | -2.92778900 | -0.72662300 |
| H           | 3.48227200  | 2.53650800  | -1.29186300 | C  | 2.43784600  | -3.34345900 | 0.37613200  |
| N           | -0.68509700 | -1.68013200 | -1.07428200 | H  | 0.75070800  | -3.59581900 | -1.09667900 |
| N           | 1.52688400  | -0.18768500 | -1.13474900 | H  | 2.07085000  | -4.36698400 | 0.37577500  |
| C           | -1.69538600 | -3.83261400 | -1.73427300 | C  | 2.26563200  | -2.64515500 | 1.66111600  |
| H           | -2.68259600 | -4.19166300 | -2.03704300 | C  | 1.45087900  | -3.24863200 | 2.63815700  |
| H           | -1.02329700 | -3.87654700 | -2.59512700 | C  | 2.90240300  | -1.42888600 | 1.97684900  |
| H           | -1.30302700 | -4.51908500 | -0.97459700 | C  | 1.27036500  | -2.65696700 | 3.88618500  |
| C           | 3.78796600  | 0.00965400  | -2.10592400 | H  | 0.96276600  | -4.19351800 | 2.41169000  |
| H           | 4.63381800  | -0.16344700 | -1.42882700 | C  | 2.72342900  | -0.83995400 | 3.22483100  |
| H           | 3.53958000  | -0.92465000 | -2.61020000 | H  | 3.55518300  | -0.95093400 | 1.25308000  |
| H           | 4.13342800  | 0.72354100  | -2.86088200 | C  | 1.90536800  | -1.44898500 | 4.18238900  |
| C           | -4.56358000 | -0.14030200 | 0.01698200  | H  | 0.64266200  | -3.14085800 | 4.62852800  |
| C           | -5.07301600 | 1.06039000  | -0.50885900 | H  | 3.23182100  | 0.09088600  | 3.45916000  |
| C           | -5.38425300 | -0.91735900 | 0.85270200  | H  | 1.77356200  | -0.98835500 | 5.15704900  |
| C           | -6.36877100 | 1.47250200  | -0.20053300 | H  | 3.75347800  | -2.02115700 | -0.63039000 |
| H           | -4.46627200 | 1.65409400  | -1.18646800 | C  | 3.57113900  | -3.86050500 | -1.84188400 |
| C           | -6.67423300 | -0.49494500 | 1.16973600  | H  | 3.52519300  | -3.37524300 | -2.82328700 |

|             |             |             |             |    |             |             |             |
|-------------|-------------|-------------|-------------|----|-------------|-------------|-------------|
| H           | 4.60996600  | -4.18772100 | -1.69602100 | H  | -5.20129600 | -2.21523300 | 1.74930500  |
| H           | 2.93621700  | -4.75076600 | -1.87440700 | C  | -7.61214400 | 0.02433700  | 0.88597600  |
| <b>TS10</b> |             |             |             | H  | -7.36543200 | 1.61401600  | -0.55116900 |
| C           | -3.25371600 | -2.30317600 | -0.37261700 | H  | -7.55663200 | -1.64778300 | 2.24800200  |
| C           | -3.53834500 | -0.99785300 | 0.00432700  | H  | -8.64674200 | 0.27233700  | 1.10389800  |
| C           | -2.44676500 | -0.07576600 | 0.04021700  | C  | 0.81812600  | 4.05891700  | -0.25649600 |
| C           | -1.16692300 | -0.56318800 | -0.31297400 | C  | 1.83604800  | 4.70381200  | 0.46679800  |
| C           | -1.95175200 | -2.72647900 | -0.70579800 | C  | -0.20025700 | 4.83662000  | -0.83518000 |
| C           | -2.56350900 | 1.29968300  | 0.42812600  | C  | 1.82569200  | 6.08885700  | 0.62411200  |
| C           | -0.04936800 | 0.33863300  | -0.39163600 | H  | 2.62442600  | 4.11199000  | 0.92394000  |
| C           | -0.23586500 | 1.72131300  | -0.16905400 | C  | -0.20015200 | 6.22315600  | -0.68679100 |
| C           | -1.50880900 | 2.16006300  | 0.32275000  | H  | -0.97351800 | 4.35946800  | -1.43029500 |
| C           | 0.87228200  | 2.58716100  | -0.44067100 | C  | 0.80812000  | 6.85176300  | 0.04727700  |
| C           | 2.02577100  | 1.99980800  | -0.93686800 | H  | 2.61185500  | 6.57189900  | 1.19695500  |
| C           | 2.14234100  | 0.60409300  | -1.11206800 | H  | -0.98477100 | 6.81320100  | -1.15132300 |
| H           | -3.51504900 | 1.65438000  | 0.80585800  | H  | 0.80295100  | 7.93129200  | 0.16548600  |
| H           | -4.06348800 | -3.02018200 | -0.45118900 | Ni | 1.00934900  | -2.21853600 | -0.55264600 |
| H           | -1.62585700 | 3.19694000  | 0.61427500  | C  | 2.58157500  | -3.75641900 | -0.10058300 |
| H           | 2.85990400  | 2.62765600  | -1.23279500 | C  | 2.65730600  | -2.67974200 | 0.77960500  |
| N           | -0.92294900 | -1.86644000 | -0.65835500 | H  | 0.73546900  | -3.63322000 | -0.61171400 |
| N           | 1.14388400  | -0.21467800 | -0.76682100 | H  | 2.04380700  | -2.76069000 | 1.68143500  |
| C           | -1.72264600 | -4.14712200 | -1.14316800 | C  | 3.76581200  | -1.71216200 | 0.89733100  |
| H           | -2.66915500 | -4.62343300 | -1.41208300 | C  | 3.60711900  | -0.57451200 | 1.71028400  |
| H           | -1.05030300 | -4.18653900 | -2.00444700 | C  | 5.02917900  | -1.95595200 | 0.32731300  |
| H           | -1.26637800 | -4.73436100 | -0.33744200 | C  | 4.66361000  | 0.30882100  | 1.91830700  |
| C           | 3.36011700  | 0.04284500  | -1.78683400 | H  | 2.64590000  | -0.38866500 | 2.18362100  |
| H           | 4.28036900  | 0.33251200  | -1.27205900 | C  | 6.08663800  | -1.07185200 | 0.53499500  |
| H           | 3.31346800  | -1.04470900 | -1.85083300 | H  | 5.19614000  | -2.85593200 | -0.25734200 |
| H           | 3.41356000  | 0.44090900  | -2.80820200 | C  | 5.90677500  | 0.06669700  | 1.32533300  |
| C           | -4.93550600 | -0.61473500 | 0.32381700  | H  | 4.52333000  | 1.17864400  | 2.55376400  |
| C           | -5.55990900 | 0.47099300  | -0.31537100 | H  | 7.05747800  | -1.28218900 | 0.09569000  |
| C           | -5.67563400 | -1.37989500 | 1.24144200  | H  | 6.73564200  | 0.74701700  | 1.49784700  |
| C           | -6.89049800 | 0.78246800  | -0.03878200 | H  | 3.21860900  | -3.72607300 | -0.98629100 |
| H           | -5.01341400 | 1.04994700  | -1.05427100 | C  | 2.16265100  | -5.14911300 | 0.32186700  |
| C           | -7.00129200 | -1.05617300 | 1.52617800  | H  | 1.73341400  | -5.72453700 | -0.50265400 |

|             |             |             |             |    |             |             |             |
|-------------|-------------|-------------|-------------|----|-------------|-------------|-------------|
| H           | 3.06085500  | -5.68084800 | 0.66566700  | H  | 5.31343600  | -2.46740800 | -1.37928200 |
| H           | 1.45007700  | -5.12639100 | 1.15166600  | C  | 7.29172500  | -1.29028800 | 1.12517800  |
| <b>CP19</b> |             |             |             | H  | 6.58571800  | -0.22105900 | 2.86064500  |
| C           | 2.63516500  | -2.72000700 | -0.39626300 | H  | 7.68792200  | -2.37970700 | -0.69424200 |
| C           | 3.16980200  | -1.48614800 | -0.05172900 | H  | 8.33463700  | -1.25201600 | 1.42557600  |
| C           | 2.29829900  | -0.35311600 | -0.11929700 | C  | -0.12038400 | 4.32808300  | -0.37629800 |
| C           | 0.94358100  | -0.58738500 | -0.45433200 | C  | -0.39580700 | 5.28904900  | -1.36443500 |
| C           | 1.27707500  | -2.87617500 | -0.73354800 | C  | 0.41478500  | 4.75171100  | 0.85335100  |
| C           | 2.73125700  | 1.00050900  | 0.05810200  | C  | -0.13014500 | 6.63773300  | -1.13326300 |
| C           | 0.02458400  | 0.51347800  | -0.58363100 | H  | -0.79443100 | 4.97344900  | -2.32467500 |
| C           | 0.48221800  | 1.83764500  | -0.39341700 | C  | 0.66583900  | 6.10322600  | 1.08570900  |
| C           | 1.86372700  | 2.04512900  | -0.07461200 | H  | 0.60289400  | 4.02550100  | 1.63909200  |
| C           | -0.44798200 | 2.90229800  | -0.61594400 | C  | 0.39881200  | 7.04823200  | 0.09242600  |
| C           | -1.69532600 | 2.55156600  | -1.10641000 | H  | -0.33478700 | 7.36742000  | -1.91111700 |
| C           | -2.08694900 | 1.20896000  | -1.28313900 | H  | 1.06461000  | 6.41865000  | 2.04540400  |
| H           | 3.77804500  | 1.19074400  | 0.26170400  | H  | 0.60036300  | 8.09987300  | 0.27352500  |
| H           | 3.26852100  | -3.60033100 | -0.37436400 | Ni | -1.55388600 | -1.71467200 | -0.77314700 |
| H           | 2.22514300  | 3.06175800  | 0.02275500  | C  | -3.43513200 | -4.24133300 | -1.66432700 |
| H           | -2.41901900 | 3.32828300  | -1.32910200 | C  | -2.90261000 | -3.41515800 | -0.48799200 |
| N           | 0.44347600  | -1.82836500 | -0.72894000 | H  | -3.37349200 | -3.68157300 | -2.60319100 |
| N           | -1.25919300 | 0.20497900  | -0.96054100 | H  | -2.87840400 | -5.17602400 | -1.78534800 |
| C           | 0.73842500  | -4.23759000 | -1.08452500 | C  | -3.42883900 | -2.02012700 | -0.36822800 |
| H           | 0.06390000  | -4.18262100 | -1.94469500 | H  | -4.48509800 | -4.49477700 | -1.48736000 |
| H           | 1.55097000  | -4.92599900 | -1.32955000 | H  | -1.74066900 | -3.39137800 | -0.63822600 |
| H           | 0.18452200  | -4.67119900 | -0.24188900 | H  | -2.95458500 | -3.96464300 | 0.45770300  |
| C           | -3.45086900 | 0.91501700  | -1.83668400 | H  | -4.11423300 | -1.74547100 | -1.16988200 |
| H           | -3.42982600 | 0.03292500  | -2.48007300 | C  | -3.81643400 | -1.48062700 | 0.95586500  |
| H           | -4.16530100 | 0.73553200  | -1.02712100 | C  | -4.97425700 | -0.68983900 | 1.08647100  |
| H           | -3.81318000 | 1.76652400  | -2.41877800 | C  | -3.06123700 | -1.73746700 | 2.11902900  |
| C           | 4.59475200  | -1.38604900 | 0.34700300  | C  | -5.35577000 | -0.16592900 | 2.32100100  |
| C           | 4.97138300  | -0.74629000 | 1.54148500  | H  | -5.59953200 | -0.51308800 | 0.21423000  |
| C           | 5.58940600  | -1.98257400 | -0.44690800 | C  | -3.43970100 | -1.21134400 | 3.35216400  |
| C           | 6.31014400  | -0.70523700 | 1.92835900  | H  | -2.16936200 | -2.35778100 | 2.05971400  |
| H           | 4.21138500  | -0.30974200 | 2.18332000  | C  | -4.58708700 | -0.42000400 | 3.45866400  |
| C           | 6.92847500  | -1.92706000 | -0.06358900 | H  | -6.26033400 | 0.43088100  | 2.39638900  |

|             |             |             |             |
|-------------|-------------|-------------|-------------|
| H           | -2.84217900 | -1.42397200 | 4.23425900  |
| H           | -4.88436200 | -0.01558500 | 4.42165500  |
| <b>CP20</b> |             |             |             |
| B           | 0.64166100  | 1.24987400  | 0.14667000  |
| O           | 0.72004400  | 0.38459100  | -1.09196500 |
| H           | 0.16805700  | 0.73876500  | -1.80021900 |
| O           | 0.11780600  | 0.28152600  | 1.17561000  |
| H           | 0.54953600  | 0.47178700  | 2.01918600  |
| O           | 1.97543200  | 1.63882200  | 0.61799800  |
| H           | 2.26995600  | 2.41619100  | 0.12437200  |
| C           | -0.36161500 | 2.51806700  | -0.09303600 |
| C           | -0.10895900 | 3.77298200  | 0.48883000  |
| C           | -1.54089100 | 2.41356800  | -0.85559900 |
| C           | -0.96669500 | 4.86258200  | 0.31582700  |
| H           | 0.78363400  | 3.89510000  | 1.10040000  |
| C           | -2.41003600 | 3.49162300  | -1.04053700 |
| H           | -1.79735900 | 1.45790800  | -1.31526000 |
| C           | -2.12351300 | 4.72657800  | -0.45414600 |
| H           | -0.73372100 | 5.81833100  | 0.78147200  |
| H           | -3.30971600 | 3.37059200  | -1.64120800 |
| H           | -2.79424900 | 5.57113300  | -0.59447700 |
| Li          | 0.34493400  | -1.21799100 | -0.03283700 |
| C           | 3.01155000  | -1.55746700 | 0.53422000  |
| O           | 1.97610800  | -2.22090700 | 0.32659000  |
| C           | -2.36573100 | -2.71246500 | -0.27446900 |
| O           | -1.21811100 | -2.25402400 | -0.36897000 |
| N           | -3.34134200 | -2.08483200 | 0.43077300  |
| N           | 3.83550000  | -1.20154300 | -0.48229900 |
| C           | -2.69498200 | -4.02553200 | -0.97100700 |
| H           | -3.05908900 | -4.78253800 | -0.26814300 |
| H           | -3.45427900 | -3.89308400 | -1.74997400 |
| H           | -1.77616200 | -4.38630300 | -1.43372300 |
| C           | 3.37599300  | -1.13080800 | 1.94243900  |
| H           | 4.41305900  | -1.36703500 | 2.20263900  |
| H           | 3.22646700  | -0.04888400 | 2.03257100  |

|   |             |             |             |
|---|-------------|-------------|-------------|
| H | 2.70751200  | -1.64842800 | 2.63206000  |
| C | 4.84133100  | -0.15388500 | -0.33250100 |
| H | 5.57791400  | -0.25250000 | -1.13481800 |
| H | 4.37617800  | 0.83793300  | -0.38191700 |
| H | 5.36551200  | -0.24862600 | 0.61966600  |
| C | 3.40964100  | -1.50116000 | -1.84980700 |
| H | 2.90509500  | -2.46739900 | -1.86130100 |
| H | 2.71138100  | -0.73687200 | -2.20922200 |
| H | 4.29290500  | -1.53986300 | -2.49424000 |
| C | -4.71899300 | -2.54737600 | 0.52013000  |
| H | -4.86636900 | -3.47688000 | -0.02638700 |
| H | -4.99509000 | -2.71261900 | 1.56945500  |
| H | -5.39876600 | -1.79062600 | 0.10698500  |
| C | -3.07645600 | -0.81937100 | 1.11685200  |
| H | -3.43597700 | -0.89057400 | 2.15052300  |
| H | -2.01114400 | -0.59061900 | 1.11955200  |
| H | -3.61159000 | 0.00025900  | 0.62058200  |

**CP21**

|   |            |             |             |
|---|------------|-------------|-------------|
| C | 1.47802300 | 2.89523900  | 0.59532300  |
| C | 2.46338000 | 2.72002600  | -0.35929500 |
| C | 2.68112600 | 1.39967300  | -0.85096900 |
| C | 1.90457800 | 0.34110000  | -0.30280300 |
| C | 0.73114400 | 1.80771000  | 1.08529000  |
| C | 3.61250900 | 1.11396800  | -1.90222200 |
| C | 2.13691100 | -1.02172300 | -0.76877400 |
| C | 3.12364700 | -1.26461500 | -1.76569400 |
| C | 3.82391900 | -0.15697100 | -2.34240900 |
| C | 3.33095900 | -2.61860300 | -2.17331200 |
| C | 2.53987100 | -3.59694400 | -1.59600200 |
| C | 1.57996400 | -3.26465900 | -0.61312400 |
| H | 4.14101200 | 1.94042700  | -2.36309900 |
| H | 1.28288300 | 3.88510900  | 0.99333900  |
| H | 4.51897500 | -0.33941400 | -3.15411000 |
| H | 2.67829600 | -4.63756700 | -1.87560000 |
| N | 0.95467900 | 0.56306900  | 0.64917400  |

|   |             |             |             |    |             |             |             |
|---|-------------|-------------|-------------|----|-------------|-------------|-------------|
| N | 1.39656700  | -2.01077000 | -0.22147500 | C  | 2.80886600  | -1.25289700 | 4.37771800  |
| C | -0.32677200 | 2.02696800  | 2.13223400  | H  | 2.77559200  | -1.08212600 | 2.22390300  |
| H | -0.38639900 | 3.08584200  | 2.40319500  | H  | 2.19588900  | 0.34612000  | 3.06495700  |
| H | -1.30545700 | 1.70171700  | 1.76492500  | H  | 2.19754900  | -0.92081000 | 5.22746500  |
| H | -0.10406000 | 1.44100900  | 3.02953300  | H  | 2.78415700  | -2.35066300 | 4.38599400  |
| C | 0.75896200  | -4.34061000 | 0.05114900  | C  | 4.23234500  | -0.77110900 | 4.55146300  |
| H | -0.11391100 | -3.90855800 | 0.54680700  | C  | 4.51116100  | 0.44604900  | 5.19071100  |
| H | 0.43650000  | -5.09675400 | -0.67426100 | C  | 5.31168300  | -1.50768100 | 4.04117000  |
| H | 1.35573600  | -4.85762800 | 0.81487900  | C  | 5.82041700  | 0.91389500  | 5.31511100  |
| C | 3.24421300  | 3.89832000  | -0.82547800 | H  | 3.68930300  | 1.02981400  | 5.60083000  |
| C | 2.57523800  | 5.02519500  | -1.33029400 | C  | 6.62334700  | -1.04584100 | 4.16212600  |
| C | 4.64482100  | 3.93354200  | -0.72119200 | H  | 5.11853500  | -2.45875800 | 3.54862400  |
| C | 3.29106500  | 6.15452700  | -1.72905400 | C  | 6.88354000  | 0.16883800  | 4.80032100  |
| H | 1.49333800  | 4.99877400  | -1.42735400 | H  | 6.01098200  | 1.85813300  | 5.81983500  |
| C | 5.35721500  | 5.06670000  | -1.11401900 | H  | 7.44355300  | -1.63817600 | 3.76320800  |
| H | 5.17225600  | 3.07697600  | -0.31082600 | H  | 7.90453400  | 0.52844600  | 4.90022900  |
| C | 4.68297600  | 6.17963600  | -1.62142100 | B  | -2.49370900 | 0.36001300  | -0.70809500 |
| H | 2.75971600  | 7.01525600  | -2.12666600 | O  | -3.43685700 | -0.29512200 | -1.69371600 |
| H | 6.43956800  | 5.08158600  | -1.01745800 | H  | -3.35404800 | 0.09817500  | -2.57222000 |
| H | 5.23918700  | 7.06088900  | -1.92959200 | O  | -3.29553100 | 0.47662400  | 0.53812500  |
| C | 4.35888500  | -3.00919600 | -3.17787700 | H  | -3.01574800 | -0.22750900 | 1.15651800  |
| C | 5.71356600  | -2.67995400 | -3.00255500 | O  | -1.32978000 | -0.56715400 | -0.52329600 |
| C | 3.99318100  | -3.76966200 | -4.30031200 | H  | -1.68187100 | -1.46151900 | -0.66371700 |
| C | 6.67235300  | -3.09730100 | -3.92578600 | C  | -2.00206200 | 1.80129700  | -1.27819500 |
| H | 6.01634500  | -2.11208900 | -2.12733700 | C  | -1.16187600 | 1.87879700  | -2.40535700 |
| C | 4.95187300  | -4.18158300 | -5.22633100 | C  | -2.43720200 | 3.02242500  | -0.73361700 |
| H | 2.94751900  | -4.02406900 | -4.45067700 | C  | -0.78843800 | 3.10087800  | -2.97146800 |
| C | 6.29474000  | -3.84697800 | -5.04197100 | H  | -0.78248400 | 0.95657100  | -2.84277000 |
| H | 7.71678000  | -2.84125600 | -3.76881000 | C  | -2.06718400 | 4.25415400  | -1.28327900 |
| H | 4.64824800  | -4.76246300 | -6.09318500 | H  | -3.07399200 | 2.99815800  | 0.14744400  |
| H | 7.04218000  | -4.16937200 | -5.76177300 | C  | -1.24528800 | 4.29809800  | -2.41319400 |
| C | 0.71867700  | -1.25124500 | 2.89599700  | H  | -0.13997000 | 3.12151900  | -3.84503500 |
| C | 2.15038500  | -0.75183700 | 3.06468900  | H  | -2.41489800 | 5.18194500  | -0.83080700 |
| H | 0.69793600  | -2.34721500 | 2.94436800  | H  | -0.96575600 | 5.25269100  | -2.85426300 |
| H | 0.07669000  | -0.88124800 | 3.70805900  | Ni | -0.25208100 | -0.89162300 | 1.24301600  |



|             |             |             |             |   |             |             |             |
|-------------|-------------|-------------|-------------|---|-------------|-------------|-------------|
| Br          | -2.07148600 | -2.31831400 | 1.99684100  | C | 2.81906000  | 1.47608300  | -0.75985300 |
| Li          | -4.91355400 | -0.12200400 | -0.47162700 | C | 1.91073900  | 0.54979400  | -0.17872800 |
| C           | -6.22745500 | -2.86441900 | -0.19077300 | C | 0.77712300  | 2.24242200  | 0.96195000  |
| O           | -6.04491100 | -1.63736100 | -0.16699300 | C | 3.81529700  | 1.00446400  | -1.67528700 |
| C           | -6.10770900 | 2.33035300  | 0.27037200  | C | 2.04853200  | -0.86671400 | -0.49748100 |
| O           | -6.11313200 | 1.42453400  | -0.58120100 | C | 3.09969100  | -1.29708700 | -1.35678900 |
| N           | -6.15736500 | 3.63642900  | -0.10554900 | C | 3.95503300  | -0.31969300 | -1.95917900 |
| N           | -7.42521900 | -3.37513900 | -0.59594300 | C | 3.20950400  | -2.69774100 | -1.61564800 |
| C           | -8.50188300 | -2.47790500 | -0.99889800 | C | 2.26698800  | -3.53844700 | -1.04635500 |
| H           | -9.38075300 | -2.63096000 | -0.35934900 | C | 1.24910300  | -3.02299200 | -0.21442200 |
| H           | -8.15739300 | -1.44948100 | -0.90759100 | H | 4.45666700  | 1.73180300  | -2.15948400 |
| H           | -8.79131100 | -2.67731200 | -2.03853600 | H | 1.49570300  | 4.25161000  | 0.67964400  |
| C           | -7.74514300 | -4.79260800 | -0.66076000 | H | 4.70691200  | -0.64399800 | -2.66954300 |
| H           | -8.06774800 | -5.05887000 | -1.67568600 | H | 2.32824800  | -4.60988700 | -1.21474400 |
| H           | -6.88318900 | -5.40461900 | -0.40339800 | N | 0.91421200  | 0.94559100  | 0.66416200  |
| H           | -8.56445500 | -5.03449900 | 0.02970600  | N | 1.15608200  | -1.72465700 | 0.04388200  |
| C           | -6.16885200 | 3.96796500  | -1.52847800 | C | -0.33391300 | 2.66832500  | 1.87933300  |
| H           | -6.52671600 | 3.10752000  | -2.09081100 | H | -0.18478900 | 3.69996100  | 2.21371600  |
| H           | -6.83284800 | 4.82383100  | -1.69257400 | H | -1.29467900 | 2.60026600  | 1.35305100  |
| H           | -5.15884900 | 4.22335700  | -1.87296700 | H | -0.38994400 | 2.00981400  | 2.75026300  |
| C           | -5.98024600 | 4.76993000  | 0.78998600  | C | 0.25266100  | -3.94136500 | 0.44702700  |
| H           | -5.06470500 | 5.31683700  | 0.52886300  | H | -0.68575500 | -3.41444400 | 0.64090200  |
| H           | -6.82774300 | 5.46187600  | 0.70220200  | H | 0.06463400  | -4.83111100 | -0.16500700 |
| H           | -5.89873700 | 4.44843700  | 1.82638200  | H | 0.63813300  | -4.28627500 | 1.41590300  |
| C           | -6.04294700 | 1.98173500  | 1.74652600  | C | 3.54688500  | 3.91962500  | -1.00513300 |
| H           | -6.33974100 | 0.93677700  | 1.84981900  | C | 2.98433300  | 4.96141900  | -1.76022200 |
| H           | -5.00897600 | 2.06718500  | 2.09839400  | C | 4.92907300  | 3.93031200  | -0.75648200 |
| H           | -6.69155900 | 2.59977200  | 2.37313200  | C | 3.78973600  | 5.98585400  | -2.25955700 |
| C           | -5.12939000 | -3.82136700 | 0.22913700  | H | 1.91842700  | 4.94970500  | -1.97233300 |
| H           | -4.27981100 | -3.24327000 | 0.59803300  | C | 5.72995700  | 4.95981600  | -1.25148100 |
| H           | -5.46032900 | -4.49684100 | 1.02534300  | H | 5.37133600  | 3.13920300  | -0.15698300 |
| H           | -4.79783900 | -4.43446200 | -0.61733000 | C | 5.16280600  | 5.98928300  | -2.00591100 |
| <b>TS11</b> |             |             |             | H | 3.34248000  | 6.78123700  | -2.84978700 |
| C           | 1.64115000  | 3.21051600  | 0.41214300  | H | 6.79642900  | 4.96001700  | -1.04233700 |
| C           | 2.66607500  | 2.85800300  | -0.44407500 | H | 5.78775500  | 6.78960500  | -2.39307400 |

|   |             |             |             |    |             |             |             |
|---|-------------|-------------|-------------|----|-------------|-------------|-------------|
| C | 4.28917300  | -3.27843300 | -2.46097300 | H  | -2.83925600 | 0.85922700  | 0.82041100  |
| C | 5.64527100  | -3.04979400 | -2.17242400 | O  | -1.21887100 | 0.05605000  | -0.78982900 |
| C | 3.96521600  | -4.11786300 | -3.53907700 | H  | -1.54455900 | -0.80112400 | -1.10217500 |
| C | 6.64603300  | -3.64142600 | -2.94321900 | C  | -1.74837400 | 2.29577700  | -1.99628600 |
| H | 5.91310700  | -2.42137000 | -1.32783900 | C  | -0.86748000 | 2.07503100  | -3.07159500 |
| C | 4.96662300  | -4.70434100 | -4.31325900 | C  | -2.12600200 | 3.62817400  | -1.75150300 |
| H | 2.92008500  | -4.29541900 | -3.77769600 | C  | -0.38934100 | 3.12093300  | -3.86431000 |
| C | 6.31051800  | -4.46812400 | -4.01768100 | H  | -0.53975000 | 1.05842000  | -3.28087900 |
| H | 7.68951800  | -3.46034100 | -2.69972700 | C  | -1.65728500 | 4.68610100  | -2.53644600 |
| H | 4.69599900  | -5.34352000 | -5.14944800 | H  | -2.79455700 | 3.83581700  | -0.91943700 |
| H | 7.09112600  | -4.92567800 | -4.61928700 | C  | -0.78543500 | 4.43560900  | -3.59933700 |
| C | 0.05319200  | -0.71102500 | 2.93232000  | H  | 0.29289100  | 2.91462600  | -4.68685500 |
| C | 1.49167900  | -0.38598800 | 3.32075300  | H  | -1.97120900 | 5.70586100  | -2.32051000 |
| H | -0.12469100 | -1.79072900 | 3.02302300  | H  | -0.42243900 | 5.25390800  | -4.21793600 |
| H | -0.66002500 | -0.21145800 | 3.60399400  | Ni | -0.54999800 | -0.33418600 | 1.12143600  |
| C | 1.86402700  | -0.89506800 | 4.73872800  | Br | -2.68379400 | -1.48458100 | 1.56126100  |
| H | 2.19242700  | -0.83433400 | 2.60326800  | Li | -4.59489100 | -0.33082500 | -0.55864600 |
| H | 1.67720700  | 0.69650600  | 3.29155000  | C  | -4.79474000 | -3.27105600 | -0.75629000 |
| H | 1.17401700  | -0.44896900 | 5.46725700  | O  | -5.19536800 | -2.12344100 | -1.00896400 |
| H | 1.69881900  | -1.98025500 | 4.77638700  | C  | -6.72031300 | 1.55878200  | 0.49579200  |
| C | 3.29187800  | -0.58177400 | 5.12827800  | O  | -6.21751300 | 0.57482000  | -0.07043200 |
| C | 3.61278000  | 0.59869800  | 5.81427200  | N  | -8.06964300 | 1.63027300  | 0.67785500  |
| C | 4.34122200  | -1.44458700 | 4.77783100  | N  | -3.95173000 | -3.91956000 | -1.60205500 |
| C | 4.93457100  | 0.90961800  | 6.13855500  | C  | -5.84990100 | 2.69650300  | 0.99390200  |
| H | 2.81325100  | 1.27868400  | 6.10194900  | H  | -4.81462000 | 2.46693200  | 0.72814000  |
| C | 5.66491100  | -1.13974800 | 5.09865000  | H  | -6.13813100 | 3.65004500  | 0.53669100  |
| H | 4.11360000  | -2.37015300 | 4.25233100  | H  | -5.92838100 | 2.80822300  | 2.08177100  |
| C | 5.96748700  | 0.04049300  | 5.78139500  | C  | -8.76188800 | 2.73035400  | 1.33016000  |
| H | 5.15705100  | 1.82871600  | 6.67547100  | H  | -8.06219200 | 3.49243700  | 1.66709600  |
| H | 6.46024000  | -1.82753200 | 4.82098400  | H  | -9.47718000 | 3.19511400  | 0.63843200  |
| H | 6.99708500  | 0.27790100  | 6.03676100  | H  | -9.32179800 | 2.36361900  | 2.20064600  |
| B | -2.30761400 | 1.05895400  | -1.10711500 | C  | -8.92718100 | 0.54751200  | 0.21020300  |
| O | -3.31457500 | 0.22934900  | -1.89656700 | H  | -8.30730300 | -0.21673000 | -0.25490000 |
| H | -3.65331300 | 0.74577500  | -2.64055400 | H  | -9.47888600 | 0.11158100  | 1.05290700  |
| O | -2.93328200 | 1.54124300  | 0.13036900  | H  | -9.65338500 | 0.92795100  | -0.51960400 |

|             |             |             |             |   |             |             |             |
|-------------|-------------|-------------|-------------|---|-------------|-------------|-------------|
| C           | -5.24433900 | -3.97087500 | 0.51387000  | C | 0.00851400  | -3.90337300 | -0.84282400 |
| H           | -5.94499900 | -3.30655600 | 1.01960200  | H | -0.89462000 | -3.42775600 | -0.45072000 |
| H           | -5.73851000 | -4.92742500 | 0.31178400  | H | -0.24442000 | -4.54104900 | -1.69757600 |
| H           | -4.39186800 | -4.14195000 | 1.17910600  | H | 0.40383100  | -4.55545900 | -0.05227700 |
| C           | -3.50088900 | -5.29171300 | -1.43047600 | C | 3.68403100  | 3.86542800  | 0.12330200  |
| H           | -2.40530000 | -5.33251900 | -1.46554100 | C | 3.15745300  | 5.11476300  | -0.24241700 |
| H           | -3.82373300 | -5.69519200 | -0.47276400 | C | 5.07127400  | 3.73848900  | 0.30086500  |
| H           | -3.89256100 | -5.93380200 | -2.23172500 | C | 4.00242800  | 6.20920900  | -0.43148000 |
| C           | -3.49738700 | -3.24727600 | -2.81736200 | H | 2.08689800  | 5.21583200  | -0.40052900 |
| H           | -4.09849700 | -3.55349100 | -3.68470800 | C | 5.91225600  | 4.83643400  | 0.11757600  |
| H           | -3.57026000 | -2.16745700 | -2.68870700 | H | 5.48695500  | 2.78073100  | 0.60204700  |
| H           | -2.45383600 | -3.52151900 | -3.00575300 | C | 5.38038500  | 6.07423300  | -0.25065100 |
| <b>CP22</b> |             |             |             | H | 3.58213500  | 7.16804100  | -0.72302100 |
| C           | 1.79071400  | 2.82285100  | 1.33645100  | H | 6.98280300  | 4.72540200  | 0.26816300  |
| C           | 2.76338000  | 2.71935500  | 0.36131100  | H | 6.03652200  | 6.92831800  | -0.39543500 |
| C           | 2.82641900  | 1.50633700  | -0.38514200 | C | 3.99555300  | -2.52184700 | -3.55636600 |
| C           | 1.88339500  | 0.48466200  | -0.08912100 | C | 5.36846700  | -2.44466200 | -3.26697600 |
| C           | 0.88727300  | 1.77093300  | 1.58783500  | C | 3.60209200  | -2.97395300 | -4.82638500 |
| C           | 3.76749600  | 1.30926500  | -1.44747800 | C | 6.31827700  | -2.80575500 | -4.22251500 |
| C           | 1.93424300  | -0.76227700 | -0.84468700 | H | 5.68932500  | -2.11922800 | -2.28152200 |
| C           | 2.93743100  | -0.94175500 | -1.83999100 | C | 4.55282000  | -3.32934100 | -5.78344200 |
| C           | 3.82594300  | 0.13951100  | -2.14124700 | H | 2.54352900  | -3.02974300 | -5.06534100 |
| C           | 2.96856600  | -2.19259600 | -2.52958000 | C | 5.91406800  | -3.24646000 | -5.48456400 |
| C           | 1.99905900  | -3.13040200 | -2.21463500 | H | 7.37548800  | -2.74814100 | -3.97778500 |
| C           | 1.03173400  | -2.86260000 | -1.22154300 | H | 4.22915900  | -3.66818900 | -6.76395400 |
| H           | 4.43348800  | 2.12457100  | -1.70550500 | H | 6.65495800  | -3.52453100 | -6.22914100 |
| H           | 1.71642000  | 3.72700200  | 1.93106800  | C | -0.00616200 | -1.60459900 | 2.52364200  |
| H           | 4.53710800  | 0.02598700  | -2.95134800 | C | 1.44635600  | -1.49316400 | 2.97457400  |
| H           | 1.99971400  | -4.09545400 | -2.71325900 | H | -0.23856900 | -2.64584700 | 2.26294600  |
| N           | 0.93465500  | 0.63672100  | 0.87962500  | H | -0.69362900 | -1.31378200 | 3.33195800  |
| N           | 1.01314800  | -1.71022700 | -0.56348200 | C | 1.78269900  | -2.43128700 | 4.16385500  |
| C           | -0.16416800 | 1.92912800  | 2.64902900  | H | 2.12414200  | -1.73594900 | 2.14484300  |
| H           | 0.05659400  | 2.79284900  | 3.28428100  | H | 1.69134700  | -0.46558600 | 3.27586400  |
| H           | -1.14407000 | 2.07154800  | 2.17495800  | H | 1.11049500  | -2.19579200 | 4.99972100  |
| H           | -0.22641800 | 1.03089700  | 3.26947000  | H | 1.56284300  | -3.46605000 | 3.86865200  |

|    |             |             |             |             |             |             |             |
|----|-------------|-------------|-------------|-------------|-------------|-------------|-------------|
| C  | 3.22156100  | -2.32415100 | 4.61891600  | O           | -6.03202500 | 0.50472200  | 0.35974400  |
| C  | 3.60031800  | -1.40590200 | 5.60924400  | N           | -6.27607800 | 2.72915200  | 0.01260000  |
| C  | 4.22433400  | -3.11122200 | 4.03338900  | N           | -5.63150100 | -3.69806500 | -0.49230200 |
| C  | 4.93373400  | -1.27507800 | 6.00100700  | C           | -6.38240700 | -2.96049900 | 0.52321900  |
| H  | 2.83699000  | -0.79069800 | 6.08173800  | H           | -5.75297600 | -2.77486200 | 1.40145700  |
| C  | 5.55948900  | -2.98542100 | 4.42033500  | H           | -6.70767800 | -2.00369900 | 0.11950600  |
| H  | 3.95084600  | -3.83563200 | 3.26852400  | H           | -7.25367800 | -3.55485500 | 0.81997100  |
| C  | 5.92012400  | -2.06526900 | 5.40706700  | C           | -5.30118100 | -5.07055600 | -0.12971300 |
| H  | 5.20164600  | -0.55939200 | 6.77464000  | H           | -6.21391900 | -5.59836300 | 0.16874500  |
| H  | 6.31802800  | -3.61072700 | 3.95532200  | H           | -4.85388800 | -5.60569200 | -0.96575400 |
| H  | 6.95852600  | -1.96846100 | 5.71358000  | H           | -4.59817700 | -5.08458800 | 0.71357600  |
| B  | -2.31842400 | 1.47857000  | -0.60889600 | C           | -6.54856400 | 2.49178600  | -1.40395800 |
| O  | -3.48143500 | 0.99863100  | -1.46730000 | H           | -7.07363000 | 1.54307700  | -1.51589200 |
| H  | -3.29324200 | 1.10743100  | -2.40986000 | H           | -7.17312700 | 3.30645400  | -1.78324600 |
| O  | -2.80419800 | 1.61284400  | 0.75399000  | H           | -5.61297200 | 2.44619100  | -1.97215300 |
| H  | -2.87000100 | 0.72517400  | 1.14814600  | C           | -5.99107900 | 4.11374900  | 0.36810500  |
| O  | -1.27285000 | 0.36599700  | -0.72433600 | H           | -5.08643100 | 4.46045500  | -0.14735900 |
| H  | -1.71929500 | -0.36656000 | -1.17598600 | H           | -6.83183400 | 4.75223300  | 0.07232300  |
| C  | -1.70903600 | 2.87894400  | -1.15591200 | H           | -5.83713200 | 4.21930600  | 1.44042200  |
| C  | -0.87512100 | 2.93187100  | -2.28736200 | C           | -5.66793400 | 1.90578800  | 2.26819600  |
| C  | -2.00604500 | 4.10517800  | -0.53368500 | H           | -5.71252700 | 0.94187600  | 2.77704600  |
| C  | -0.37449900 | 4.13840300  | -2.78461300 | H           | -4.64431100 | 2.28782400  | 2.33933200  |
| H  | -0.59314100 | 2.00152800  | -2.77808600 | H           | -6.35311400 | 2.60551400  | 2.75676100  |
| C  | -1.51078000 | 5.32013900  | -1.01582800 | C           | -4.23326800 | -3.81331800 | -2.53126600 |
| H  | -2.62551300 | 4.09572300  | 0.36019100  | H           | -3.28936400 | -4.13654300 | -2.07741100 |
| C  | -0.69358500 | 5.34184800  | -2.14975900 | H           | -4.75255400 | -4.69739000 | -2.91476200 |
| H  | 0.26935300  | 4.14133300  | -3.66209500 | H           | -4.00896000 | -3.14296700 | -3.36164400 |
| H  | -1.75870800 | 6.25071700  | -0.50801800 |             |             |             |             |
| H  | -0.31034600 | 6.28471700  | -2.53428700 | <b>TS12</b> |             |             |             |
| Ni | -0.59485800 | -0.63323100 | 0.94508100  | C           | 2.21420900  | 3.10275100  | 0.87587800  |
| Br | -2.79426300 | -1.79175200 | 1.00706200  | C           | 3.10407300  | 2.80037700  | -0.14045200 |
| Li | -4.60158200 | -0.31313000 | -0.63903600 | C           | 3.04581700  | 1.49287100  | -0.70895500 |
| C  | -5.06126100 | -3.03240000 | -1.52511500 | C           | 2.07281300  | 0.59403500  | -0.19472900 |
| O  | -5.20760500 | -1.80574700 | -1.68021100 | C           | 1.27763200  | 2.15249100  | 1.33324600  |
| C  | -5.99937200 | 1.66890300  | 0.80878400  | C           | 3.88564200  | 1.06707300  | -1.78904300 |
|    |             |             |             | C           | 2.00765100  | -0.76734600 | -0.71441700 |

|   |             |             |             |   |             |             |             |
|---|-------------|-------------|-------------|---|-------------|-------------|-------------|
| C | 2.93552500  | -1.17672700 | -1.71169800 | C | 4.19846100  | -4.36127300 | -5.19760700 |
| C | 3.83631400  | -0.20817200 | -2.26482500 | H | 2.25667900  | -3.85140600 | -4.41531800 |
| C | 2.89119700  | -2.53649100 | -2.14160500 | C | 5.58002300  | -4.26918000 | -5.01856500 |
| C | 1.93529900  | -3.36155600 | -1.57172100 | H | 7.16276500  | -3.52984400 | -3.75255200 |
| C | 1.03678500  | -2.87849200 | -0.59827400 | H | 3.79370700  | -4.87989600 | -6.06253100 |
| H | 4.56452500  | 1.78426600  | -2.23628400 | H | 6.25572200  | -4.71949500 | -5.74054400 |
| H | 2.24157100  | 4.08267400  | 1.34119700  | C | -0.18906100 | -1.15467900 | 2.61082600  |
| H | 4.47627000  | -0.50224000 | -3.08885500 | C | 1.22571100  | -1.37379800 | 3.12660300  |
| H | 1.89067100  | -4.40857200 | -1.85457300 | H | -0.77267300 | -2.08572400 | 2.63560400  |
| N | 1.20846800  | 0.93885700  | 0.78854800  | H | -0.72162700 | -0.40405700 | 3.21802800  |
| N | 1.06981700  | -1.60514700 | -0.20113200 | C | 1.27189900  | -1.87932700 | 4.59302900  |
| C | 0.35408600  | 2.46756400  | 2.47804200  | H | 1.75346100  | -2.10158000 | 2.49518800  |
| H | 0.36998200  | 3.53589500  | 2.71248900  | H | 1.80651000  | -0.44453800 | 3.06207500  |
| H | -0.66665100 | 2.16012000  | 2.23375900  | H | 0.75057100  | -1.15363600 | 5.23167900  |
| H | 0.66657800  | 1.91474900  | 3.37316800  | H | 0.70509600  | -2.81727500 | 4.66124100  |
| C | 0.04517100  | -3.80524600 | 0.04894600  | C | 2.67914300  | -2.09254600 | 5.10603400  |
| H | -0.95507100 | -3.36103800 | 0.07650000  | C | 3.39514900  | -1.04520700 | 5.70445400  |
| H | 0.00465500  | -4.76522100 | -0.47506400 | C | 3.32143100  | -3.33117800 | 4.96257400  |
| H | 0.33476100  | -3.99730600 | 1.08955100  | C | 4.70764700  | -1.22587900 | 6.14339700  |
| C | 4.07369900  | 3.83545200  | -0.59318400 | H | 2.91269100  | -0.07808800 | 5.83231900  |
| C | 3.60408400  | 5.08672300  | -1.02492000 | C | 4.63385100  | -3.51877700 | 5.39953400  |
| C | 5.45962800  | 3.61001300  | -0.55356900 | H | 2.78122800  | -4.15976800 | 4.50859300  |
| C | 4.49952500  | 6.08324100  | -1.41462800 | C | 5.33316800  | -2.46536900 | 5.99225400  |
| H | 2.53269000  | 5.26275000  | -1.07156100 | H | 5.24025600  | -0.40000600 | 6.60890400  |
| C | 6.35275800  | 4.61059700  | -0.93752200 | H | 5.10865300  | -4.49002300 | 5.28231600  |
| H | 5.83646100  | 2.65394600  | -0.20067600 | H | 6.35375400  | -2.61020200 | 6.33719200  |
| C | 5.87543800  | 5.84935900  | -1.37131000 | B | -2.07300800 | 1.37658200  | -0.49712100 |
| H | 4.12050300  | 7.04336300  | -1.75475900 | O | -3.38291200 | 1.15102300  | -1.20502300 |
| H | 7.42237100  | 4.42361000  | -0.89174700 | H | -3.30871900 | 1.40774300  | -2.13499200 |
| H | 6.57183700  | 6.62734100  | -1.67244800 | O | -2.30577500 | 1.26172100  | 0.94933000  |
| C | 3.83068200  | -3.10004400 | -3.14938600 | H | -2.80132900 | 0.43854400  | 1.12351200  |
| C | 5.22300200  | -3.01504100 | -2.97946000 | O | -1.13562900 | 0.25077900  | -0.93595300 |
| C | 3.33135300  | -3.78572500 | -4.26875000 | H | -1.71787600 | -0.48591600 | -1.19427400 |
| C | 6.08897700  | -3.59690900 | -3.90529400 | C | -1.44234500 | 2.81451800  | -0.89406300 |
| H | 5.62484600  | -2.50940900 | -2.10612900 | C | -0.67255500 | 2.98666800  | -2.05818900 |

|    |             |             |             |             |             |             |             |
|----|-------------|-------------|-------------|-------------|-------------|-------------|-------------|
| C  | -1.71920400 | 3.97174100  | -0.14228500 | H           | -5.38338300 | 0.63778300  | 2.82267700  |
| C  | -0.21376200 | 4.24434300  | -2.46286400 | H           | -4.22881900 | 1.95607400  | 2.55939500  |
| H  | -0.41976900 | 2.11147200  | -2.65337300 | H           | -5.85662700 | 2.31528500  | 3.19796700  |
| C  | -1.26189400 | 5.23406600  | -0.52890900 | C           | -4.26751400 | -3.07822000 | -3.06517900 |
| H  | -2.29795700 | 3.87000500  | 0.77287800  | H           | -3.38553300 | -3.38258200 | -2.48994300 |
| C  | -0.50960100 | 5.37635900  | -1.69889400 | H           | -4.64919300 | -3.94681700 | -3.61041100 |
| H  | 0.37499800  | 4.34218700  | -3.37294400 | H           | -3.96947700 | -2.30826700 | -3.77804200 |
| H  | -1.49154400 | 6.10822300  | 0.07796300  |             |             |             |             |
| H  | -0.16262300 | 6.35852500  | -2.01335800 | <b>CP23</b> |             |             |             |
| Ni | -0.46752300 | -0.49618100 | 0.83713500  | Li          | -0.00000100 | 0.91979400  | 0.55426800  |
| Br | -3.17674200 | -1.92262700 | 0.58705300  | C           | 2.65887000  | 0.98970100  | 0.27828400  |
| Li | -4.68857200 | -0.16582700 | -0.69453300 | O           | 1.74307100  | 1.46924800  | 0.98540600  |
| C  | -5.28883500 | -2.46416000 | -2.12650400 | N           | 3.25309400  | -0.17925300 | 0.60173300  |
| O  | -5.45267400 | -1.22762200 | -2.11905300 | C           | -2.65882200 | 0.98973100  | 0.27820700  |
| C  | -5.76866700 | 1.77211600  | 1.07712400  | O           | -1.74307000 | 1.46925900  | 0.98541100  |
| O  | -5.98325200 | 0.73048700  | 0.42754500  | N           | -3.25312800 | -0.17917500 | 0.60168100  |
| N  | -5.96182200 | 2.99429700  | 0.52221400  | Br          | -0.00001600 | -0.90465900 | -1.00992100 |
| N  | -6.01204100 | -3.27813000 | -1.32053400 | C           | -4.06486500 | -0.94669700 | -0.33832600 |
| C  | -6.93352000 | -2.67533600 | -0.35744500 | H           | -4.83897600 | -1.48984000 | 0.21313000  |
| H  | -6.41933300 | -2.45830700 | 0.58671000  | H           | -4.55315100 | -0.29326400 | -1.05983400 |
| H  | -7.32466700 | -1.74371600 | -0.76375400 | H           | -3.43633800 | -1.66517200 | -0.87965800 |
| H  | -7.75525600 | -3.37463100 | -0.17303000 | C           | -2.71513200 | -0.94430400 | 1.72674500  |
| C  | -5.64234500 | -4.66090700 | -1.04005100 | H           | -1.86238200 | -1.54955500 | 1.39372800  |
| H  | -6.54989700 | -5.25443600 | -0.88716900 | H           | -2.38762600 | -0.25750400 | 2.50697800  |
| H  | -5.08520900 | -5.09580700 | -1.86878700 | H           | -3.50214200 | -1.59578500 | 2.11745300  |
| H  | -5.02415800 | -4.71256100 | -0.13424200 | C           | 2.71495500  | -0.94448000 | 1.72665900  |
| C  | -6.35454000 | 3.08450400  | -0.88112500 | H           | 2.38713600  | -0.25772700 | 2.50680400  |
| H  | -6.87233200 | 2.17022400  | -1.16737700 | H           | 1.86238300  | -1.54985400 | 1.39341500  |
| H  | -7.01889900 | 3.94522700  | -1.01225600 | H           | 3.50197500  | -1.59581900 | 2.11758100  |
| H  | -5.47187900 | 3.20867200  | -1.51987500 | C           | 4.06486200  | -0.94668600 | -0.33831600 |
| C  | -5.54689900 | 4.25154300  | 1.12968400  | H           | 4.55376100  | -0.29312200 | -1.05929600 |
| H  | -4.68030900 | 4.66259600  | 0.59629200  | H           | 4.83849500  | -1.49043700 | 0.21320300  |
| H  | -6.36621200 | 4.97905100  | 1.07749700  | H           | 3.43624700  | -1.66463900 | -0.88024400 |
| H  | -5.27302800 | 4.11209400  | 2.17365500  | C           | -3.11656700 | 1.73789400  | -0.95724900 |
| C  | -5.28800300 | 1.67906100  | 2.51257500  | H           | -2.72195800 | 1.23681300  | -1.84886900 |
|    |             |             |             | H           | -4.20530700 | 1.80335100  | -1.04314200 |

|             |             |             |             |   |             |             |             |
|-------------|-------------|-------------|-------------|---|-------------|-------------|-------------|
| H           | -2.69855100 | 2.74438600  | -0.90957300 | C | -0.47344200 | 7.02941600  | 0.20595100  |
| C           | 3.11679100  | 1.73788500  | -0.95710000 | H | -1.80969000 | 5.41748700  | -0.30260000 |
| H           | 4.20554900  | 1.80350900  | -1.04269800 | C | 1.66641400  | 6.37792500  | 1.11444700  |
| H           | 2.72252900  | 1.23671300  | -1.84882200 | H | 1.99346300  | 4.26152900  | 1.33522900  |
| H           | 2.69860200  | 2.74431200  | -0.90957000 | C | 0.77936000  | 7.37922100  | 0.71334500  |
| <b>CP24</b> |             |             |             | H | -1.16917600 | 7.80180300  | -0.11050200 |
| C           | -1.54541900 | 2.84659200  | 1.03457000  | H | 2.63903500  | 6.64179300  | 1.52097900  |
| C           | -0.37267600 | 3.24464000  | 0.41639000  | H | 1.06203600  | 8.42493700  | 0.79772300  |
| C           | 0.38903300  | 2.24957400  | -0.27153000 | C | 3.90371000  | -0.64580300 | -2.88875900 |
| C           | -0.09570800 | 0.91271300  | -0.23680100 | C | 4.98917100  | -0.05593900 | -2.21889500 |
| C           | -1.96282200 | 1.49558000  | 1.00271300  | C | 4.08609700  | -1.08840600 | -4.20901900 |
| C           | 1.57146700  | 2.54511500  | -1.02221000 | C | 6.22131700  | 0.08944700  | -2.85596700 |
| C           | 0.65901700  | -0.14344900 | -0.89998900 | H | 4.87095100  | 0.26690400  | -1.18852900 |
| C           | 1.86660300  | 0.18790300  | -1.57747700 | C | 5.31686200  | -0.93457300 | -4.84722900 |
| C           | 2.27528200  | 1.56016200  | -1.64574900 | H | 3.25176100  | -1.53836400 | -4.74020300 |
| C           | 2.60055600  | -0.86150400 | -2.20424500 | C | 6.38806600  | -0.34588400 | -4.17246800 |
| C           | 2.06144100  | -2.13634100 | -2.16010500 | H | 7.05340500  | 0.53781900  | -2.32008000 |
| C           | 0.85755600  | -2.39940700 | -1.48310700 | H | 5.43751800  | -1.27329900 | -5.87256400 |
| H           | 1.89430300  | 3.57640900  | -1.10901400 | H | 7.34759500  | -0.22886400 | -4.66850100 |
| H           | -2.14362700 | 3.57464100  | 1.57467300  | C | -0.75893900 | -2.46668700 | 1.70040100  |
| H           | 3.15488000  | 1.81000300  | -2.22722200 | C | 0.65772400  | -2.07386200 | 2.10238300  |
| H           | 2.59216000  | -2.96170000 | -2.62279100 | H | -0.86665600 | -3.56478000 | 1.69727400  |
| N           | -1.24187000 | 0.56657500  | 0.38762900  | H | -1.48319300 | -2.07263500 | 2.42691300  |
| N           | 0.18546400  | -1.42515000 | -0.85476000 | C | 1.04233100  | -2.54374800 | 3.52983100  |
| C           | -3.24951800 | 1.07408500  | 1.66041400  | H | 1.39614100  | -2.48641200 | 1.40051700  |
| H           | -4.10157900 | 1.29861000  | 1.00656800  | H | 0.77475300  | -0.98240400 | 2.05917700  |
| H           | -3.25350400 | -0.00269800 | 1.83725700  | H | 0.31731600  | -2.13025900 | 4.24307100  |
| H           | -3.40323000 | 1.60774000  | 2.60521600  | H | 0.94220500  | -3.63632100 | 3.58091400  |
| C           | 0.31655800  | -3.80397400 | -1.43224500 | C | 2.44373800  | -2.13831500 | 3.93121800  |
| H           | -0.70870600 | -3.84639100 | -1.81389400 | C | 2.68365800  | -0.91987400 | 4.58319300  |
| H           | 0.93988100  | -4.48134800 | -2.02395700 | C | 3.54605000  | -2.95007600 | 3.62523400  |
| H           | 0.28359100  | -4.16550600 | -0.39934800 | C | 3.97953800  | -0.52373100 | 4.91855400  |
| C           | 0.04887500  | 4.67055600  | 0.49296500  | H | 1.84140200  | -0.27879100 | 4.83604100  |
| C           | -0.83729600 | 5.68687700  | 0.10051600  | C | 4.84440200  | -2.55954100 | 3.95710900  |
| C           | 1.30622500  | 5.03484900  | 1.00355300  | H | 3.38118200  | -3.90362600 | 3.12717500  |

|             |             |             |             |   |             |             |             |
|-------------|-------------|-------------|-------------|---|-------------|-------------|-------------|
| C           | 5.06644500  | -1.34291700 | 4.60588700  | C | 0.59741500  | 3.00852900  | 0.05798300  |
| H           | 4.13982300  | 0.42225700  | 5.43026300  | H | -3.94771700 | -0.57708700 | -1.72282900 |
| H           | 5.68246700  | -3.20887500 | 3.71542100  | H | -0.50236900 | -3.92546400 | -2.06988200 |
| H           | 6.07594600  | -1.03924300 | 4.87088500  | H | -3.97394700 | 1.75914200  | -1.01011600 |
| B           | -3.94170500 | -2.09091200 | -0.85423600 | H | -0.52935300 | 4.79160600  | 0.52909800  |
| O           | -4.28542300 | -3.37456900 | -1.42440200 | N | 0.58517300  | -0.92828000 | -1.00555600 |
| H           | -5.21099100 | -3.37761300 | -1.69931700 | N | 0.57414900  | 1.73643200  | -0.33235400 |
| O           | -3.31351800 | -2.35335900 | 0.53497300  | C | 1.92955900  | -2.92297200 | -1.45136100 |
| H           | -3.35294200 | -3.31221300 | 0.68036900  | H | 1.78941900  | -3.98987200 | -1.65164400 |
| O           | -2.73698200 | -1.52249500 | -1.59231500 | H | 2.56142200  | -2.49978600 | -2.24041200 |
| H           | -2.55900600 | -2.14664400 | -2.31230000 | H | 2.46454000  | -2.79726800 | -0.50527800 |
| C           | -5.14963900 | -1.02909900 | -0.75444900 | C | 1.93300700  | 3.61195300  | 0.39815200  |
| C           | -5.21271600 | 0.11448900  | -1.56919800 | H | 2.31796700  | 3.16347800  | 1.32244200  |
| C           | -6.22401500 | -1.24181700 | 0.12971900  | H | 2.65857800  | 3.39827700  | -0.39314100 |
| C           | -6.28895000 | 1.00498700  | -1.50576900 | H | 1.85496900  | 4.69322400  | 0.54884500  |
| H           | -4.39419300 | 0.30866500  | -2.25820600 | C | -3.02290600 | -3.02644200 | -2.09379500 |
| C           | -7.30599700 | -0.36180700 | 0.20227300  | C | -3.09807200 | -3.71007000 | -3.31803300 |
| H           | -6.20804100 | -2.11112000 | 0.78578700  | C | -4.09437800 | -3.13831800 | -1.19156900 |
| C           | -7.34132500 | 0.76878500  | -0.61823900 | C | -4.21958700 | -4.47546500 | -3.63797100 |
| H           | -6.30821900 | 1.88244000  | -2.14937800 | H | -2.27843200 | -3.62513500 | -4.02641800 |
| H           | -8.11907700 | -0.55324600 | 0.89956400  | C | -5.21127300 | -3.91067100 | -1.50989200 |
| H           | -8.18082700 | 1.45841100  | -0.56570100 | H | -4.03910000 | -2.63675900 | -0.22958200 |
| Ni          | -1.51795000 | -1.84850400 | 0.02160200  | C | -5.27919400 | -4.57842600 | -2.73469000 |
| <b>TS13</b> |             |             |             | H | -4.26520800 | -4.98988100 | -4.59398700 |
| C           | -0.56657900 | -2.88020200 | -1.78615400 | H | -6.02643300 | -3.99550500 | -0.79646700 |
| C           | -1.79953300 | -2.25339700 | -1.74672600 | H | -6.15148200 | -5.17701300 | -2.98226100 |
| C           | -1.82789400 | -0.87974500 | -1.36658300 | C | -3.05133500 | 4.03504200  | 0.04008700  |
| C           | -0.60055500 | -0.25435900 | -1.00391800 | C | -4.11897300 | 3.61049800  | 0.84921200  |
| C           | 0.60878900  | -2.20395100 | -1.41128700 | C | -3.13820200 | 5.29096600  | -0.58248700 |
| C           | -3.03482400 | -0.10700000 | -1.37653700 | C | -5.24173000 | 4.41905100  | 1.02607600  |
| C           | -0.61101900 | 1.15167900  | -0.61304900 | H | -4.05658200 | 2.65305000  | 1.35867400  |
| C           | -1.85080800 | 1.85138200  | -0.55219400 | C | -4.26450600 | 6.09565900  | -0.41019500 |
| C           | -3.04894500 | 1.19476300  | -0.98015200 | H | -2.32221600 | 5.62747700  | -1.21621900 |
| C           | -1.82212800 | 3.20988000  | -0.11531600 | C | -5.31969900 | 5.66243700  | 0.39494200  |
| C           | -0.58791500 | 3.76564900  | 0.17881800  | H | -6.05351200 | 4.07929400  | 1.66357600  |



|    |             |             |             |                          |             |             |             |
|----|-------------|-------------|-------------|--------------------------|-------------|-------------|-------------|
| H  | -4.31751900 | 7.06059600  | -0.90702500 | O                        | 5.13346500  | 0.61638000  | -2.88929200 |
| H  | -6.19596600 | 6.29010100  | 0.53168100  | H                        | 5.19341200  | -0.34441700 | -2.96152700 |
| Ni | 2.39261800  | -0.11755700 | -0.49286700 | O                        | 3.91792600  | 2.40444700  | -1.94124400 |
| C  | 2.29483800  | -0.56097800 | 1.40627500  | H                        | 4.78364700  | 2.80230300  | -2.11170800 |
| C  | 0.98470700  | -1.09308500 | 1.98513300  | O                        | 2.73695800  | 0.38715500  | -2.40500000 |
| H  | 2.55501900  | 0.39066200  | 1.89257100  | H                        | 2.11010400  | 1.09829700  | -2.61633800 |
| H  | 3.11264200  | -1.25933000 | 1.62944500  | <b>B(OH)<sub>3</sub></b> |             |             |             |
| C  | 1.04140500  | -1.30159400 | 3.52158700  | B                        | 0.00002800  | -0.00005300 | -0.00064500 |
| H  | 0.15362600  | -0.40835000 | 1.76951800  | O                        | 1.36484300  | 0.14081900  | 0.00001800  |
| H  | 0.71166700  | -2.05418300 | 1.52632200  | H                        | 1.80031000  | -0.72328500 | 0.00025100  |
| H  | 1.85411800  | -2.00274000 | 3.75287300  | O                        | -0.56048500 | -1.25229700 | 0.00017700  |
| H  | 1.30773700  | -0.34781000 | 3.99603800  | H                        | -1.52652100 | -1.19747400 | 0.00044900  |
| C  | -0.26025900 | -1.81435900 | 4.09745500  | O                        | -0.80436100 | 1.11151000  | 0.00009000  |
| C  | -0.52196400 | -3.18988600 | 4.18242800  | H                        | -0.27390500 | 1.92077300  | 0.00024500  |
| C  | -1.26131600 | -0.92712700 | 4.52022000  | <b>CP25</b>              |             |             |             |
| C  | -1.74075900 | -3.66457400 | 4.67013600  | C                        | -0.59163400 | 3.04275100  | -2.12429400 |
| H  | 0.24400000  | -3.89579600 | 3.86714900  | C                        | -1.58170800 | 2.94760200  | -1.16028700 |
| C  | -2.48216500 | -1.39500600 | 5.00916700  | C                        | -1.86339200 | 1.64611100  | -0.63794300 |
| H  | -1.07523900 | 0.14405000  | 4.47042800  | C                        | -1.03064200 | 0.58282000  | -1.06136400 |
| C  | -2.72737400 | -2.76775000 | 5.08571500  | C                        | 0.19367800  | 1.92888100  | -2.49760800 |
| H  | -1.91765200 | -4.73576000 | 4.73170100  | C                        | -2.97537700 | 1.34273900  | 0.21335200  |
| H  | -3.23980300 | -0.68727900 | 5.33753200  | C                        | -1.33123900 | -0.77537400 | -0.67741700 |
| H  | -3.67495500 | -3.13506900 | 5.47151600  | C                        | -2.44531000 | -1.04126100 | 0.15448700  |
| C  | 6.24872700  | -1.34160800 | 0.42013200  | C                        | -3.24943100 | 0.06071200  | 0.59440400  |
| C  | 5.12765400  | -1.06678700 | -0.36209100 | C                        | -2.74648200 | -2.41197900 | 0.42929400  |
| C  | 4.44042100  | 0.17059700  | -0.30863200 | C                        | -1.99061200 | -3.36756300 | -0.22756000 |
| C  | 4.97050500  | 1.12442200  | 0.58575100  | C                        | -0.90582300 | -3.02191400 | -1.06613600 |
| C  | 6.09412500  | 0.87107500  | 1.37483800  | H                        | -3.63234700 | 2.14767500  | 0.52225000  |
| C  | 6.73454800  | -0.36763500 | 1.29813000  | H                        | -0.38071800 | 4.00333100  | -2.58490700 |
| H  | 6.74457300  | -2.30779400 | 0.35064100  | H                        | -4.12133000 | -0.14275900 | 1.20565300  |
| H  | 4.77602900  | -1.84473600 | -1.04094100 | H                        | -2.21204500 | -4.42039500 | -0.08050100 |
| H  | 4.49574800  | 2.09983600  | 0.65207600  | N                        | 0.02941000  | 0.74422400  | -1.90674100 |
| H  | 6.47263300  | 1.63624700  | 2.04976000  | N                        | -0.54291100 | -1.74610800 | -1.23074700 |
| H  | 7.60932700  | -0.57142600 | 1.91139600  | C                        | 1.19975300  | 2.06581900  | -3.61034000 |
| B  | 4.03402300  | 1.00769300  | -2.10704100 | H                        | 0.69143400  | 2.42430200  | -4.51479700 |

|    |             |             |             |             |             |             |             |
|----|-------------|-------------|-------------|-------------|-------------|-------------|-------------|
| H  | 1.98119400  | 2.79439200  | -3.36703000 | H           | 3.29341000  | -0.38014500 | 0.69320900  |
| H  | 1.66895500  | 1.10536200  | -3.82540600 | H           | 5.28041500  | 0.93621400  | -0.06031400 |
| C  | -0.15980200 | -4.10837700 | -1.78972300 | H           | 4.28265300  | 2.37986700  | -0.20566000 |
| H  | 0.37763500  | -3.70351800 | -2.64721100 | C           | 4.64372200  | 1.76105400  | 1.81917300  |
| H  | 0.58111900  | -4.57970000 | -1.13497300 | C           | 5.30968000  | 0.84732900  | 2.65041400  |
| H  | -0.86127800 | -4.88096400 | -2.12540000 | C           | 4.17549000  | 2.95183300  | 2.39265900  |
| C  | -2.32498600 | 4.16347000  | -0.73817900 | C           | 5.50072100  | 1.11283700  | 4.00680700  |
| C  | -2.44859600 | 4.50267700  | 0.62024600  | H           | 5.68424500  | -0.08116000 | 2.22437700  |
| C  | -2.87621600 | 5.02654000  | -1.69961300 | C           | 4.36372900  | 3.22382300  | 3.74936800  |
| C  | -3.10590800 | 5.67160600  | 1.00323600  | H           | 3.66203700  | 3.67716100  | 1.76412800  |
| H  | -2.00527600 | 3.85971300  | 1.37526300  | C           | 5.02783100  | 2.30400600  | 4.56290100  |
| C  | -3.53921000 | 6.19153600  | -1.31451100 | H           | 6.02373900  | 0.39108300  | 4.62968300  |
| H  | -2.79901900 | 4.76994100  | -2.75263700 | H           | 3.99625700  | 4.15721100  | 4.16957100  |
| C  | -3.65570700 | 6.51805000  | 0.03803800  | H           | 5.17958500  | 2.51452700  | 5.61852900  |
| H  | -3.18219700 | 5.92407100  | 2.05729800  | C           | 2.40662500  | -2.32654500 | -1.21401200 |
| H  | -3.96744300 | 6.84233600  | -2.07193300 | C           | 2.43239900  | -2.92647400 | 0.05992300  |
| H  | -4.17013400 | 7.42669000  | 0.33820900  | C           | 3.18449700  | -2.94015900 | -2.21529400 |
| C  | -3.83806000 | -2.83007000 | 1.34724600  | C           | 3.16812100  | -4.09027600 | 0.31613900  |
| C  | -4.79182400 | -3.77314600 | 0.92987900  | H           | 1.86211500  | -2.48563600 | 0.87730800  |
| C  | -3.91211500 | -2.33459400 | 2.66053500  | C           | 3.91221900  | -4.11014300 | -1.97400500 |
| C  | -5.79585300 | -4.20269800 | 1.79737600  | H           | 3.22543400  | -2.49959100 | -3.21089300 |
| H  | -4.75315700 | -4.15553200 | -0.08642000 | C           | 3.90644800  | -4.69422100 | -0.70446100 |
| C  | -4.91295500 | -2.77005300 | 3.52884100  | H           | 3.16445600  | -4.52514400 | 1.31455800  |
| H  | -3.16611900 | -1.62532500 | 3.00775400  | H           | 4.49282600  | -4.56239500 | -2.77653800 |
| C  | -5.85951000 | -3.70283300 | 3.09955700  | H           | 4.47771900  | -5.59927700 | -0.51092700 |
| H  | -6.53029800 | -4.92621700 | 1.45415800  | <b>TS14</b> |             |             |             |
| H  | -4.94817000 | -2.38498800 | 4.54429300  | C           | 1.45808600  | 2.42566400  | -2.07628800 |
| H  | -6.64022400 | -4.03919900 | 3.77613800  | C           | 0.48583100  | 3.03561700  | -1.29645800 |
| Ni | 1.29973600  | -0.83807400 | -1.60273300 | C           | -0.57894000 | 2.21311900  | -0.81554900 |
| C  | 2.91279100  | 0.23239000  | -1.35452600 | C           | -0.50953100 | 0.82244400  | -1.08870800 |
| C  | 3.15922500  | 0.54736700  | 0.12422400  | C           | 1.43683900  | 1.04024300  | -2.33096300 |
| H  | 2.76176400  | 1.17579000  | -1.89477100 | C           | -1.73640800 | 2.71857600  | -0.13863800 |
| H  | 3.79673600  | -0.24983800 | -1.78780900 | C           | -1.57356600 | -0.05684100 | -0.65687300 |
| C  | 4.40246900  | 1.44537100  | 0.35942100  | C           | -2.69789200 | 0.47782700  | 0.02245400  |
| H  | 2.28589800  | 1.05351700  | 0.56320300  | C           | -2.74723400 | 1.89145800  | 0.25591400  |

|   |             |             |             |    |             |             |             |
|---|-------------|-------------|-------------|----|-------------|-------------|-------------|
| C | -3.74724800 | -0.42419300 | 0.37589300  | C  | -7.25257800 | 0.68440000  | 2.61075700  |
| C | -3.61854900 | -1.73948300 | -0.04627500 | H  | -8.35716900 | -0.23599900 | 1.00235400  |
| C | -2.47455300 | -2.19646100 | -0.72976000 | H  | -5.87857000 | 1.51502500  | 4.05182700  |
| H | -1.81862100 | 3.78625300  | 0.03051800  | H  | -8.13967900 | 0.95303900  | 3.17772600  |
| H | 2.26900100  | 3.02136500  | -2.48525400 | Ni | 0.51386000  | -1.79229100 | -1.30140700 |
| H | -3.62552900 | 2.30917700  | 0.73477800  | C  | 2.46385900  | -2.41780500 | -0.83582400 |
| H | -4.40599300 | -2.45263400 | 0.17810100  | C  | 2.89095000  | -1.63618700 | 0.40943800  |
| N | 0.50259400  | 0.24373900  | -1.79801800 | H  | 2.59491000  | -1.81362200 | -1.74940600 |
| N | -1.44056300 | -1.37876800 | -0.97944800 | H  | 3.14402800  | -3.25862000 | -0.98237700 |
| C | 2.48607300  | 0.41628800  | -3.21312900 | C  | 4.39468300  | -1.26899900 | 0.39948200  |
| H | 2.86199700  | 1.13942500  | -3.94394600 | H  | 2.30229300  | -0.71706200 | 0.51699500  |
| H | 3.34531900  | 0.06458500  | -2.62701300 | H  | 2.69001800  | -2.23591000 | 1.30550600  |
| H | 2.07289300  | -0.44517200 | -3.74507300 | H  | 4.98208500  | -2.19107000 | 0.29547900  |
| C | -2.37958000 | -3.62733800 | -1.17368100 | H  | 4.61260900  | -0.65859400 | -0.48755600 |
| H | -1.88422700 | -3.69469400 | -2.14489500 | C  | 4.82593500  | -0.52441300 | 1.64487900  |
| H | -1.77864700 | -4.21426200 | -0.47012000 | C  | 5.25952800  | -1.21776200 | 2.78394400  |
| H | -3.37471900 | -4.07866600 | -1.24056700 | C  | 4.76334900  | 0.87498600  | 1.70553900  |
| C | 0.57520000  | 4.49174600  | -1.01268800 | C  | 5.61852300  | -0.53610600 | 3.94778800  |
| C | 0.51628600  | 4.98207900  | 0.30352500  | H  | 5.31950200  | -2.30384000 | 2.75505300  |
| C | 0.77348800  | 5.40718300  | -2.06002600 | C  | 5.12108400  | 1.56219400  | 2.86670100  |
| C | 0.64958100  | 6.34615600  | 0.56184200  | H  | 4.43430300  | 1.43156600  | 0.82993900  |
| H | 0.38844800  | 4.28592200  | 1.12754500  | C  | 5.55038900  | 0.85797200  | 3.99349500  |
| C | 0.90105400  | 6.77169600  | -1.80087700 | H  | 5.95597700  | -1.09395500 | 4.81777100  |
| H | 0.80850400  | 5.04439300  | -3.08369100 | H  | 5.06948700  | 2.64799400  | 2.88940100  |
| C | 0.83985300  | 7.24606700  | -0.48907600 | H  | 5.83326900  | 1.39076200  | 4.89759000  |
| H | 0.61108900  | 6.70499000  | 1.58685200  | C  | 1.03239100  | -3.50741700 | -0.69100000 |
| H | 1.04447700  | 7.46477200  | -2.62548800 | C  | 0.69604600  | -3.93031500 | 0.62951100  |
| H | 0.94070500  | 8.30883500  | -0.28694200 | C  | 1.00820800  | -4.52844900 | -1.69538000 |
| C | -4.95246000 | -0.00921800 | 1.13999100  | C  | 0.32698800  | -5.24662500 | 0.90676400  |
| C | -6.23508100 | -0.33137700 | 0.66482400  | H  | 0.70870300  | -3.20745500 | 1.44158900  |
| C | -4.84411400 | 0.66274800  | 2.37015100  | C  | 0.62687300  | -5.83304000 | -1.40939500 |
| C | -7.37398200 | 0.01480500  | 1.39147800  | H  | 1.31014700  | -4.27579500 | -2.71089300 |
| H | -6.33511600 | -0.84157800 | -0.28930400 | C  | 0.28177400  | -6.21352200 | -0.10357400 |
| C | -5.98359100 | 1.00457300  | 3.09820300  | H  | 0.06358000  | -5.51925900 | 1.92766100  |
| H | -3.85996100 | 0.89510600  | 2.76702200  | H  | 0.60705600  | -6.57067000 | -2.21006100 |

|             |             |             |             |   |             |             |             |
|-------------|-------------|-------------|-------------|---|-------------|-------------|-------------|
| H           | 0.00016000  | -7.23874200 | 0.12006600  | C | 1.42848900  | 3.37970100  | -0.72691300 |
| <b>3b</b>   |             |             |             | C | 1.74369000  | 2.09871800  | -0.18332300 |
| C           | -2.54746300 | 0.00087300  | -0.51714500 | C | 0.78551700  | 1.06252000  | -0.33205700 |
| C           | -3.13374900 | 1.20407000  | -0.10024900 | C | -0.74043100 | 2.45833000  | -1.40118100 |
| C           | -3.14115000 | -1.20209200 | -0.11029400 | C | 2.94113600  | 1.84290000  | 0.55823400  |
| C           | -4.27696200 | 1.20738700  | 0.70045800  | C | 1.04703600  | -0.22745200 | 0.26402400  |
| H           | -2.69107200 | 2.14838500  | -0.41107100 | C | 2.25869100  | -0.45489700 | 0.97041100  |
| C           | -4.28443900 | -1.20505500 | 0.69035300  | C | 3.19097500  | 0.62195300  | 1.10773200  |
| H           | -2.70426800 | -2.14647900 | -0.42897800 | C | 2.45115300  | -1.73551200 | 1.56842200  |
| C           | -4.85649700 | 0.00124000  | 1.09947600  | C | 1.40829400  | -2.64126600 | 1.47827300  |
| H           | -4.71754000 | 2.15211400  | 1.00893500  | C | 0.22309500  | -2.34641100 | 0.77537000  |
| H           | -4.73085100 | -2.14959500 | 0.99090000  | H | 3.64163700  | 2.65612600  | 0.70797600  |
| H           | -5.74858000 | 0.00141100  | 1.72015400  | H | -0.11680600 | 4.49237500  | -1.69178500 |
| C           | -1.28396600 | 0.00058700  | -1.35137600 | H | 4.08932900  | 0.46423800  | 1.69283900  |
| C           | -0.00000300 | -0.00018100 | -0.49732700 | H | 1.50993200  | -3.62129500 | 1.93232100  |
| H           | -1.27411600 | 0.88052600  | -2.00877600 | N | -0.41602000 | 1.22864900  | -0.97372900 |
| H           | -1.27495700 | -0.87895100 | -2.00928400 | N | 0.06749000  | -1.17246300 | 0.15010200  |
| C           | 1.28396100  | -0.00126100 | -1.35137300 | C | -2.06469800 | 2.75604500  | -2.04460800 |
| H           | 0.00066600  | 0.87722500  | 0.16258400  | H | -2.33204100 | 3.79546400  | -1.83149800 |
| H           | -0.00067400 | -0.87733200 | 0.16292100  | H | -1.99133000 | 2.66143800  | -3.13719500 |
| H           | 1.27415500  | -0.88146900 | -2.00841000 | H | -2.86903600 | 2.12113200  | -1.66529700 |
| H           | 1.27492000  | 0.87800600  | -2.00964400 | C | -0.87095000 | -3.37657400 | 0.72090500  |
| C           | 2.54746200  | -0.00113000 | -0.51713800 | H | -1.82342300 | -2.93789900 | 1.03091700  |
| C           | 3.14102000  | 1.20204300  | -0.11073000 | H | -0.99281900 | -3.75907900 | -0.29824300 |
| C           | 3.13388000  | -1.20411600 | -0.09981000 | H | -0.63814900 | -4.21741600 | 1.38074300  |
| C           | 4.28431800  | 1.20541400  | 0.68992200  | C | 2.36517900  | 4.53413200  | -0.68841300 |
| H           | 2.70404800  | 2.14627800  | -0.42974800 | C | 3.66545500  | 4.43751000  | -1.21259700 |
| C           | 4.27708800  | -1.20702700 | 0.70088500  | C | 1.93814100  | 5.76740200  | -0.16929800 |
| H           | 2.69129200  | -2.14858000 | -0.41030000 | C | 4.51456800  | 5.54403700  | -1.21432600 |
| C           | 4.85650000  | -0.00067500 | 1.09947300  | H | 4.00213100  | 3.49729600  | -1.64043600 |
| H           | 4.73063100  | 2.15011300  | 0.99012500  | C | 2.79124100  | 6.87089800  | -0.16520300 |
| H           | 4.71777000  | -2.15159100 | 1.00970200  | H | 0.93851300  | 5.85170700  | 0.24784000  |
| H           | 5.74858500  | -0.00052400 | 1.72014800  | C | 4.08144500  | 6.76295600  | -0.68795900 |
| <b>TS15</b> |             |             |             | H | 5.51333400  | 5.45476000  | -1.63297400 |
| C           | 0.17745800  | 3.52889100  | -1.28885400 | H | 2.44741000  | 7.81460300  | 0.24916400  |

|    |             |             |             |             |             |             |             |
|----|-------------|-------------|-------------|-------------|-------------|-------------|-------------|
| H  | 4.74486200  | 7.62336600  | -0.68678700 | H           | -2.59267900 | 2.09261600  | 1.67727400  |
| C  | 3.69759300  | -2.11901800 | 2.28282200  | O           | -4.48005900 | 1.10779100  | -0.75139300 |
| C  | 3.62883600  | -2.65228400 | 3.58055700  | H           | -5.21813200 | 1.73194400  | -0.70726500 |
| C  | 4.95572800  | -2.01052000 | 1.66582600  | O           | -2.89823000 | -0.15228200 | 0.54830000  |
| C  | 4.78580500  | -3.05643700 | 4.24645600  | H           | -3.43484800 | -0.95364800 | 0.62858000  |
| H  | 2.66371100  | -2.73073700 | 4.07336200  | C           | -4.99205300 | 0.72712200  | 1.74330100  |
| C  | 6.11092200  | -2.42187700 | 2.33030100  | C           | -5.94029600 | -0.30131200 | 1.57667900  |
| H  | 5.02409000  | -1.62207700 | 0.65356000  | C           | -5.07159500 | 1.45732100  | 2.94134600  |
| C  | 6.03018500  | -2.94321800 | 3.62341500  | C           | -6.89396700 | -0.60354100 | 2.55216100  |
| H  | 4.71430700  | -3.45697500 | 5.25390800  | H           | -5.94388800 | -0.86663400 | 0.64382400  |
| H  | 7.07433900  | -2.33983800 | 1.83451500  | C           | -6.01978000 | 1.17185100  | 3.92776300  |
| H  | 6.93113100  | -3.25992300 | 4.14142400  | H           | -4.37950900 | 2.28388400  | 3.09576500  |
| Ni | -1.43813800 | -0.54849600 | -1.02169000 | C           | -6.93441800 | 0.13318500  | 3.73880400  |
| C  | -2.44584800 | -0.26117200 | -2.82288400 | H           | -7.61100100 | -1.40607100 | 2.38628600  |
| C  | -1.99653000 | -1.55874500 | -2.96597000 | H           | -6.05036100 | 1.76175300  | 4.84248600  |
| H  | -1.89281800 | 0.53222700  | -3.31395200 | H           | -7.67567900 | -0.09348500 | 4.50224300  |
| H  | -3.44589300 | -0.02617500 | -2.46692200 | <b>CP26</b> |             |             |             |
| C  | -0.77883100 | -1.94472500 | -3.78427300 | C           | -1.98536400 | 3.50324400  | -0.43778800 |
| H  | -1.97296500 | -1.88696500 | -0.98613400 | C           | -3.09133200 | 2.74081400  | -0.09803200 |
| H  | -2.68696000 | -2.37597700 | -2.76913100 | C           | -2.94925800 | 1.32178300  | -0.12283000 |
| H  | -1.13917000 | -2.15057600 | -4.80579600 | C           | -1.69922700 | 0.78856700  | -0.54420300 |
| H  | -0.09902600 | -1.08935600 | -3.85989600 | C           | -0.76863500 | 2.90406000  | -0.81993100 |
| C  | -0.03113100 | -3.16702000 | -3.28568500 | C           | -3.97756900 | 0.42309800  | 0.30558300  |
| C  | -0.60776700 | -4.44252700 | -3.37634900 | C           | -1.50570700 | -0.64815500 | -0.60847100 |
| C  | 1.24954500  | -3.05356500 | -2.73165200 | C           | -2.57674200 | -1.50086600 | -0.22968300 |
| C  | 0.07099800  | -5.57105100 | -2.91393100 | C           | -3.79427600 | -0.92516600 | 0.25744300  |
| H  | -1.59474100 | -4.55518200 | -3.82077100 | C           | -2.36770000 | -2.90938300 | -0.30739300 |
| C  | 1.93528000  | -4.18041500 | -2.27190600 | C           | -1.12299600 | -3.34100100 | -0.71942700 |
| H  | 1.71333500  | -2.07251800 | -2.66036900 | C           | -0.09796800 | -2.43787400 | -1.07487600 |
| C  | 1.34682800  | -5.44318500 | -2.35882000 | H           | -4.90141100 | 0.83196400  | 0.69755100  |
| H  | -0.39259800 | -6.55078200 | -2.99533500 | H           | -2.05863100 | 4.58592500  | -0.43418700 |
| H  | 2.92982500  | -4.07053900 | -1.84730100 | H           | -4.57398900 | -1.58852200 | 0.61298900  |
| H  | 1.87950200  | -6.32153200 | -2.00430300 | H           | -0.92313500 | -4.40410700 | -0.80024000 |
| B  | -3.85923700 | 1.03226100  | 0.58812100  | N           | -0.64377600 | 1.57587200  | -0.88358600 |
| O  | -3.06292300 | 2.22905700  | 0.84295300  | N           | -0.29238500 | -1.11464900 | -1.02653300 |

|   |             |             |             |    |            |             |             |
|---|-------------|-------------|-------------|----|------------|-------------|-------------|
| C | 0.41362500  | 3.76899400  | -1.16942700 | H  | 1.91495800 | 1.61196800  | -1.45522100 |
| H | 0.15336800  | 4.82930900  | -1.10250400 | H  | 2.73759700 | -1.10793800 | -2.58104300 |
| H | 1.24875200  | 3.56581800  | -0.49122200 | H  | 4.06735800 | 0.51923700  | -4.11651400 |
| H | 0.76475400  | 3.55605000  | -2.18424500 | H  | 3.40578300 | 1.84325400  | -3.17254900 |
| C | 1.21762800  | -2.98281200 | -1.54347900 | C  | 4.88909900 | 0.64122500  | -2.15500900 |
| H | 2.03356400  | -2.53814700 | -0.95511300 | C  | 4.80646500 | 1.05093900  | -0.81464100 |
| H | 1.24134800  | -4.07009700 | -1.42816100 | C  | 6.09466800 | 0.09245200  | -2.60985000 |
| H | 1.37205400  | -2.75977200 | -2.60630400 | C  | 5.89957800 | 0.90951800  | 0.04337300  |
| C | -4.36056200 | 3.42125900  | 0.27494500  | H  | 3.87600600 | 1.45714000  | -0.42999400 |
| C | -4.35879800 | 4.41487400  | 1.26763500  | C  | 7.19203500 | -0.04684400 | -1.75600600 |
| C | -5.56648100 | 3.13039100  | -0.38529200 | H  | 6.17754700 | -0.22785900 | -3.64675500 |
| C | -5.53249400 | 5.09168100  | 1.59905900  | C  | 7.09698400 | 0.36112000  | -0.42568800 |
| H | -3.43496600 | 4.64138500  | 1.79274900  | H  | 5.80505600 | 1.21627800  | 1.08115300  |
| C | -6.73742400 | 3.81391400  | -0.05831000 | H  | 8.11724800 | -0.47632300 | -2.13221400 |
| H | -5.57923400 | 2.38141200  | -1.17196800 | H  | 7.94569300 | 0.25003600  | 0.24398800  |
| C | -6.72493700 | 4.79393900  | 0.93663100  | B  | 2.29519300 | -0.73070100 | 1.35382400  |
| H | -5.51488400 | 5.84981500  | 2.37713800  | O  | 1.12067700 | -1.49269400 | 1.78209500  |
| H | -7.65920800 | 3.58374800  | -0.58553300 | H  | 1.36273500 | -2.01771700 | 2.55675100  |
| H | -7.63867500 | 5.32276700  | 1.19310300  | O  | 3.08502900 | -1.49124600 | 0.38723400  |
| C | -3.41728700 | -3.90896700 | 0.02863000  | H  | 3.93185800 | -1.04845100 | 0.23419200  |
| C | -4.66951600 | -3.89950800 | -0.60867500 | O  | 1.68758500 | 0.49782400  | 0.62825600  |
| C | -3.14270500 | -4.92281400 | 0.96085500  | H  | 0.88418900 | 0.70340900  | 1.13059500  |
| C | -5.62116000 | -4.87698900 | -0.31812800 | C  | 3.22068000 | -0.21905100 | 2.60717000  |
| H | -4.88787500 | -3.13638300 | -1.35059600 | C  | 3.16326600 | 1.07735800  | 3.14969600  |
| C | -4.09853200 | -5.89498700 | 1.25573000  | C  | 4.11524800 | -1.11486200 | 3.22600300  |
| H | -2.18097200 | -4.93319900 | 1.46607500  | C  | 3.94083700 | 1.46173600  | 4.24630900  |
| C | -5.33997100 | -5.87552100 | 0.61693000  | H  | 2.49971100 | 1.80912300  | 2.69184100  |
| H | -6.58090800 | -4.86142300 | -0.82750800 | C  | 4.89540700 | -0.74945900 | 4.32610300  |
| H | -3.87288000 | -6.66650200 | 1.98675100  | H  | 4.21043800 | -2.12119200 | 2.81990800  |
| H | -6.08329800 | -6.63448300 | 0.84483800  | C  | 4.81036400 | 0.54568000  | 4.84310300  |
| C | 1.22990400  | 0.22821300  | -3.32865100 | H  | 3.87070500 | 2.47616400  | 4.63560700  |
| C | 2.50073700  | -0.07908100 | -2.83187200 | H  | 5.57544000 | -1.47048100 | 4.77659100  |
| H | 1.06099000  | 1.17758900  | -3.83396800 | H  | 5.41733500 | 0.83874500  | 5.69705200  |
| H | 0.51132600  | -0.55556200 | -3.55168700 | Ni | 1.12344400 | 0.43623800  | -1.32032600 |
| C | 3.71656100  | 0.79285300  | -3.10940200 |    |            |             |             |

**CP27**

|   |             |             |             |    |             |             |             |
|---|-------------|-------------|-------------|----|-------------|-------------|-------------|
| C | -1.60855800 | -2.94595300 | 1.03297300  | H  | -6.75323900 | -5.29337600 | 1.25218000  |
| C | -2.85875200 | -2.83059100 | 0.46430300  | H  | -5.86058400 | -7.28458900 | 0.05733000  |
| C | -3.25145800 | -1.54165200 | -0.01004800 | C  | -5.60994300 | 2.64778700  | -2.13134500 |
| C | -2.35538400 | -0.45249600 | 0.17418500  | C  | -6.81699900 | 2.41929200  | -1.44919500 |
| C | -0.76598500 | -1.82618900 | 1.19882400  | C  | -5.65983400 | 3.24556000  | -3.40113200 |
| C | -4.48162700 | -1.33317700 | -0.71202000 | C  | -8.03716000 | 2.77647400  | -2.02304300 |
| C | -2.71110600 | 0.85102200  | -0.37555700 | H  | -6.79439200 | 1.97898600  | -0.45631600 |
| C | -3.97489000 | 1.02372100  | -1.01045800 | C  | -6.88098200 | 3.59673600  | -3.97694800 |
| C | -4.83650900 | -0.10481300 | -1.18000300 | H  | -4.73401800 | 3.42003100  | -3.94255000 |
| C | -4.29638900 | 2.32491800  | -1.50873300 | C  | -8.07365500 | 3.36391200  | -3.28959400 |
| C | -3.33637100 | 3.31369400  | -1.39724900 | H  | -8.95988700 | 2.60113900  | -1.47642600 |
| C | -2.09032500 | 3.04539700  | -0.78580800 | H  | -6.89979900 | 4.05040400  | -4.96426600 |
| H | -5.12824700 | -2.18517700 | -0.88662100 | H  | -9.02486200 | 3.63952800  | -3.73667600 |
| H | -1.25706300 | -3.91200400 | 1.38048300  | C  | -0.60251000 | 1.40083400  | 2.89609500  |
| H | -5.76663400 | 0.02010900  | -1.72250900 | H  | -0.00529300 | 2.30136200  | 3.05555200  |
| H | -3.54770500 | 4.31607200  | -1.75896000 | B  | 1.95912800  | -0.37545500 | -1.30171600 |
| N | -1.15778200 | -0.60496800 | 0.82033800  | O  | 2.57305500  | 0.30398300  | -2.51182900 |
| N | -1.80450300 | 1.85225500  | -0.28226600 | H  | 2.32684900  | -0.15859800 | -3.32391600 |
| C | 0.59665900  | -2.04687000 | 1.79400100  | O  | 3.05080000  | -0.37768000 | -0.29291900 |
| H | 0.51790400  | -2.33733200 | 2.84672200  | H  | 2.89032500  | 0.34917400  | 0.33800700  |
| H | 1.09597800  | -2.85300400 | 1.24639400  | O  | 0.81128500  | 0.48027500  | -0.85716400 |
| H | 1.21497900  | -1.15212500 | 1.72369700  | H  | 1.01243500  | 1.37623000  | -1.17022500 |
| C | -1.05042500 | 4.13250900  | -0.68205900 | C  | 1.44922700  | -1.86603100 | -1.69491000 |
| H | -0.20325200 | 3.79875200  | -0.07888100 | C  | 0.28157500  | -2.04560100 | -2.46032000 |
| H | -0.68527400 | 4.41406700  | -1.67911600 | C  | 2.16411100  | -3.02840900 | -1.35371200 |
| H | -1.47576700 | 5.03738700  | -0.23050700 | C  | -0.14913800 | -3.31062900 | -2.87101300 |
| C | -3.71510600 | -4.04108600 | 0.33140500  | H  | -0.30966900 | -1.17135800 | -2.72697700 |
| C | -3.21607300 | -5.17437700 | -0.33125900 | C  | 1.74492800  | -4.30060200 | -1.75354100 |
| C | -4.99953000 | -4.09917200 | 0.89690400  | H  | 3.06115800  | -2.92739100 | -0.74763700 |
| C | -3.98668100 | -6.33312100 | -0.43190400 | C  | 0.58450800  | -4.44679000 | -2.51878200 |
| H | -2.22845300 | -5.13199100 | -0.78297500 | H  | -1.05594900 | -3.41131000 | -3.46439200 |
| C | -5.76518500 | -5.26132900 | 0.80080500  | H  | 2.32148000  | -5.17933700 | -1.46976800 |
| H | -5.38923200 | -3.23620400 | 1.42988300  | H  | 0.25901200  | -5.43371800 | -2.84109300 |
| C | -5.26219900 | -6.38079100 | 0.13411900  | Ni | 0.08710600  | 0.92927500  | 1.06635200  |
| H | -3.58992300 | -7.19885400 | -0.95547400 | Br | 1.97109800  | 2.50743000  | 1.25979600  |

|    |             |             |             |             |             |             |             |
|----|-------------|-------------|-------------|-------------|-------------|-------------|-------------|
| C  | -2.08258300 | 1.79585500  | 2.92097500  | H           | 8.05163000  | -4.47843500 | -1.97827200 |
| C  | -2.52194700 | 2.44662800  | 4.24679700  | H           | 9.25064700  | -3.21553500 | -1.62697000 |
| H  | -2.73409600 | 0.93671100  | 2.71055300  | C           | 3.79589200  | 3.74026600  | -1.98909200 |
| H  | -2.26465500 | 2.51204400  | 2.11385000  | H           | 4.19865800  | 4.66894000  | -2.40884500 |
| H  | -3.57720500 | 2.74763800  | 4.20939300  | H           | 3.60825400  | 3.02932900  | -2.79393200 |
| H  | -2.39427200 | 1.76493900  | 5.09437900  | H           | 2.84802100  | 3.96498400  | -1.48911400 |
| H  | -1.92497900 | 3.34384700  | 4.45317500  | C           | 4.56425300  | 5.09121400  | 0.44697500  |
| C  | -0.18353500 | 0.36952200  | 3.89180800  | H           | 5.31105100  | 5.69209500  | 0.97584600  |
| C  | 1.14346100  | 0.35705000  | 4.37563400  | H           | 4.24165400  | 5.65015900  | -0.43134900 |
| C  | -1.05598900 | -0.61473700 | 4.39974700  | H           | 3.70048300  | 4.92855100  | 1.10387300  |
| C  | 1.57693000  | -0.59318900 | 5.29560000  | C           | 5.93439000  | 3.14890700  | 1.11124200  |
| H  | 1.83654200  | 1.10559000  | 4.00009200  | H           | 5.26140700  | 2.77080000  | 1.89175500  |
| C  | -0.62486700 | -1.56660700 | 5.32690100  | H           | 6.47870300  | 2.31358300  | 0.67422500  |
| H  | -2.09139300 | -0.63529200 | 4.07163200  | H           | 6.63871300  | 3.86037800  | 1.55444300  |
| C  | 0.69619200  | -1.56844500 | 5.77806800  | <b>TS16</b> |             |             |             |
| H  | 2.60722900  | -0.57187100 | 5.64454200  | C           | -2.33726400 | -3.17828600 | 0.18240900  |
| H  | -1.32858700 | -2.30738100 | 5.70133700  | C           | -3.57245200 | -2.64439800 | -0.12642900 |
| H  | 1.03195700  | -2.30754800 | 6.50117200  | C           | -3.67072400 | -1.22363600 | -0.21247400 |
| Li | 4.31866000  | 0.27920300  | -1.67332400 | C           | -2.51694200 | -0.44752300 | 0.09290600  |
| C  | 4.75533600  | 3.09528200  | -1.00722500 | C           | -1.23215200 | -2.35819400 | 0.49159200  |
| O  | 5.16469800  | 1.93444100  | -1.19435600 | C           | -4.86890000 | -0.56879700 | -0.64409300 |
| C  | 6.33389000  | -1.82090400 | -1.59101500 | C           | -2.58530900 | 1.00091300  | -0.06907500 |
| O  | 5.69035900  | -0.96843300 | -2.22409800 | C           | -3.82207300 | 1.61160200  | -0.42414900 |
| N  | 7.35911100  | -2.49600400 | -2.18284300 | C           | -4.95001800 | 0.78708100  | -0.73054200 |
| N  | 5.16782900  | 3.81868600  | 0.06412400  | C           | -3.85690300 | 3.03778900  | -0.52116600 |
| C  | 5.99543000  | -2.12531500 | -0.14168500 | C           | -2.67387600 | 3.72668000  | -0.32398300 |
| H  | 5.85226400  | -3.19711300 | 0.03000100  | C           | -1.47787800 | 3.03626700  | -0.02547400 |
| H  | 6.79298400  | -1.78014400 | 0.52726500  | H           | -5.71908500 | -1.17927800 | -0.92506600 |
| H  | 5.06941800  | -1.60246600 | 0.10727800  | H           | -2.21129000 | -4.25440900 | 0.23210400  |
| C  | 7.68365000  | -2.24479100 | -3.58232600 | H           | -5.86589000 | 1.25428800  | -1.07362100 |
| H  | 7.62153700  | -3.17828700 | -4.15566000 | H           | -2.66423000 | 4.81171000  | -0.37745100 |
| H  | 6.97622100  | -1.52146600 | -3.98271600 | N           | -1.34751300 | -1.02292800 | 0.50532900  |
| H  | 8.70328700  | -1.84867200 | -3.67158300 | N           | -1.44750500 | 1.71588900  | 0.10172400  |
| C  | 8.19268000  | -3.48871500 | -1.52308700 | C           | 0.09416000  | -2.99742000 | 0.78423900  |
| H  | 7.96197300  | -3.55800200 | -0.46186000 | H           | 0.49715100  | -2.66100800 | 1.74118500  |



|   |             |             |             |    |             |             |             |
|---|-------------|-------------|-------------|----|-------------|-------------|-------------|
| H | -0.00677000 | -4.08646700 | 0.81326000  | O  | 0.71019100  | -0.07096800 | -1.05303900 |
| H | 0.82335800  | -2.73116100 | 0.01076500  | H  | 0.65108900  | 0.84406800  | -1.36189800 |
| C | -0.19451600 | 3.80115100  | 0.17789900  | C  | 1.44495300  | -1.63369200 | -3.01326700 |
| H | 0.61671500  | 3.12496000  | 0.45824700  | C  | 0.78152500  | -1.07244000 | -4.12154800 |
| H | 0.08314500  | 4.34100000  | -0.73729000 | C  | 1.70058000  | -3.01494100 | -3.06763200 |
| H | -0.31471400 | 4.55257000  | 0.96879100  | C  | 0.39075200  | -1.83958200 | -5.22128000 |
| C | -4.72283100 | -3.55591700 | -0.37297600 | H  | 0.56034000  | -0.00510700 | -4.12267500 |
| C | -4.60875700 | -4.58885600 | -1.31750300 | C  | 1.31675100  | -3.79652500 | -4.16162100 |
| C | -5.91507800 | -3.44354300 | 0.36202600  | H  | 2.21323500  | -3.48104400 | -2.22978600 |
| C | -5.66187500 | -5.47909600 | -1.52851200 | C  | 0.65857000  | -3.21077000 | -5.24489800 |
| H | -3.69503600 | -4.67982400 | -1.89832500 | H  | -0.12330700 | -1.37123600 | -6.05863600 |
| C | -6.96414000 | -4.33927800 | 0.15516800  | H  | 1.53243600  | -4.86358000 | -4.17052100 |
| H | -6.00949500 | -2.66315000 | 1.11202000  | H  | 0.35804800  | -3.81445600 | -6.09857000 |
| C | -6.84224700 | -5.35760300 | -0.79282700 | Ni | 0.25005700  | 0.08095000  | 0.97322300  |
| H | -5.55960900 | -6.26666700 | -2.27016700 | Br | 2.45979800  | 1.12144800  | 1.35209200  |
| H | -7.87532400 | -4.24423300 | 0.73967200  | C  | -1.58700900 | 0.85404900  | 3.21185900  |
| H | -7.66139700 | -6.05271000 | -0.95556400 | C  | -1.79257300 | 1.23358300  | 4.69106800  |
| C | -5.10422900 | 3.79520500  | -0.81601600 | H  | -2.40586300 | 0.19365000  | 2.89592000  |
| C | -6.25809800 | 3.63564600  | -0.02985700 | H  | -1.68706000 | 1.76315600  | 2.61100200  |
| C | -5.12876700 | 4.73267400  | -1.86143500 | H  | -2.76993900 | 1.70932500  | 4.84621400  |
| C | -7.40292500 | 4.39014300  | -0.28590700 | H  | -1.73489100 | 0.35661100  | 5.34441200  |
| H | -6.24799100 | 2.93149200  | 0.79723200  | H  | -1.02004300 | 1.94014800  | 5.01959400  |
| C | -6.27618400 | 5.48261700  | -2.12036200 | C  | 0.06348400  | -1.06159500 | 3.62816300  |
| H | -4.24613400 | 4.85883600  | -2.48251500 | C  | 1.38981200  | -1.40644300 | 3.97212100  |
| C | -7.41685600 | 5.31397600  | -1.33321300 | C  | -0.94462600 | -1.98508600 | 3.97499500  |
| H | -8.28291000 | 4.26014000  | 0.33827400  | C  | 1.69042600  | -2.60846200 | 4.60835700  |
| H | -6.27919200 | 6.19662200  | -2.93955000 | H  | 2.18745500  | -0.71544200 | 3.71307300  |
| H | -8.31026400 | 5.89911600  | -1.53331400 | C  | -0.64486000 | -3.18941900 | 4.61516000  |
| C | -0.21589100 | 0.22949100  | 2.92922200  | H  | -1.98219900 | -1.75851900 | 3.74597000  |
| H | 0.55078400  | 0.95369200  | 3.21404500  | C  | 0.67463200  | -3.51378200 | 4.93376900  |
| B | 1.88936100  | -0.71012800 | -1.74997800 | H  | 2.72417900  | -2.83914500 | 4.85695600  |
| O | 2.71855100  | 0.46858100  | -2.25066600 | H  | -1.45016300 | -3.87516300 | 4.87053800  |
| H | 3.04524300  | 0.25785900  | -3.13708900 | H  | 0.90791500  | -4.45048600 | 5.43363300  |
| O | 2.64125900  | -1.48742300 | -0.76589900 | Li | 4.12917000  | 0.52897400  | -0.90786300 |
| H | 2.54358600  | -1.06543700 | 0.10618000  | C  | 4.41417000  | 3.44115200  | -0.81185200 |

|             |             |             |             |   |             |             |             |
|-------------|-------------|-------------|-------------|---|-------------|-------------|-------------|
| O           | 4.94584100  | 2.32073300  | -0.84634600 | C | -4.82901700 | 0.25457600  | -0.64747900 |
| C           | 6.36410400  | -1.56049000 | -0.73613700 | C | -2.26227700 | 1.17042500  | 0.10723700  |
| O           | 5.79014700  | -0.46738300 | -0.85261500 | C | -3.35232100 | 2.07829200  | -0.01319500 |
| N           | 7.72767500  | -1.62010000 | -0.71303500 | C | -4.63301800 | 1.58226100  | -0.41695200 |
| N           | 4.79152300  | 4.36750500  | 0.11151900  | C | -3.08652700 | 3.46380300  | 0.21321700  |
| C           | 5.57076900  | -2.84770500 | -0.61736600 | C | -1.77526300 | 3.83923600  | 0.45646100  |
| H           | 5.81367000  | -3.54245000 | -1.42971400 | C | -0.73996200 | 2.87938500  | 0.47334100  |
| H           | 5.77609300  | -3.35590800 | 0.33220000  | H | -5.79020600 | -0.09447200 | -1.00650500 |
| H           | 4.51079600  | -2.58775700 | -0.66985700 | H | -2.95264100 | -3.98132100 | -0.75838000 |
| C           | 8.51066900  | -0.39523900 | -0.82268400 | H | -5.44075400 | 2.28569000  | -0.58388100 |
| H           | 9.15475300  | -0.43452800 | -1.71084600 | H | -1.53953200 | 4.88220900  | 0.64706200  |
| H           | 7.82971900  | 0.45042900  | -0.90154900 | N | -1.47528600 | -1.13140200 | 0.21525000  |
| H           | 9.14902200  | -0.27409100 | 0.06210000  | N | -0.99042400 | 1.58407500  | 0.31363400  |
| C           | 8.50341700  | -2.84273200 | -0.58502600 | C | -0.46017900 | -3.36660400 | 0.03454700  |
| H           | 7.85627000  | -3.71383200 | -0.50523400 | H | -0.20441400 | -3.52795900 | 1.08532400  |
| H           | 9.15663100  | -2.97395200 | -1.45828400 | H | -0.71053000 | -4.33588200 | -0.40780500 |
| H           | 9.13933700  | -2.79902300 | 0.30938200  | H | 0.42843300  | -2.96923000 | -0.46716600 |
| C           | 3.34331000  | 3.81183900  | -1.82285600 | C | 0.69612700  | 3.29594100  | 0.66244300  |
| H           | 3.74183000  | 4.50154200  | -2.57755600 | H | 1.27439700  | 2.49021300  | 1.12252900  |
| H           | 3.02238800  | 2.88917500  | -2.30896200 | H | 1.15881700  | 3.52081600  | -0.30848400 |
| H           | 2.47574200  | 4.28363200  | -1.35319900 | H | 0.76826300  | 4.19963100  | 1.27745100  |
| C           | 4.22473100  | 5.70289500  | 0.21692700  | C | -5.27589400 | -2.69200000 | -1.08139200 |
| H           | 5.02656700  | 6.41930300  | 0.43107400  | C | -5.36534200 | -3.47779700 | -2.24175700 |
| H           | 3.74654700  | 6.00357200  | -0.71451700 | C | -6.42364800 | -2.52930600 | -0.28745900 |
| H           | 3.48803500  | 5.76137900  | 1.03034300  | C | -6.57206600 | -4.07668100 | -2.60399800 |
| C           | 5.71723200  | 3.99367000  | 1.17486500  | H | -4.48616100 | -3.60348500 | -2.86763900 |
| H           | 5.23308900  | 4.10931000  | 2.15229400  | C | -7.62757100 | -3.13503700 | -0.64712900 |
| H           | 6.00398300  | 2.95341200  | 1.03617100  | H | -6.36383600 | -1.94362100 | 0.62565600  |
| H           | 6.60907200  | 4.63279300  | 1.14536500  | C | -7.70650400 | -3.90766200 | -1.80790100 |
| <b>CP28</b> |             |             |             | H | -6.62506900 | -4.67424200 | -3.51001300 |
| C           | -2.86365100 | -2.91938800 | -0.55578500 | H | -8.50305900 | -3.00759600 | -0.01607900 |
| C           | -3.96919400 | -2.10071600 | -0.68356100 | H | -8.64570600 | -4.37646500 | -2.08860200 |
| C           | -3.78566000 | -0.70616200 | -0.44293400 | C | -4.15495900 | 4.49984800  | 0.20189900  |
| C           | -2.49943700 | -0.26184500 | -0.02976500 | C | -5.29679300 | 4.37960700  | 1.01245200  |
| C           | -1.62272000 | -2.42594400 | -0.09949200 | C | -4.01178100 | 5.65255000  | -0.58777100 |

|    |             |             |             |    |             |             |             |
|----|-------------|-------------|-------------|----|-------------|-------------|-------------|
| C  | -6.26640500 | 5.38205400  | 1.02888800  | H  | -1.98266300 | -0.65855900 | 5.19729500  |
| H  | -5.41162900 | 3.50565200  | 1.64723500  | H  | -0.85774400 | 0.70268000  | 5.28321400  |
| C  | -4.98496100 | 6.65179600  | -0.57521100 | C  | -0.44035000 | -2.09771300 | 3.25228400  |
| H  | -3.13893200 | 5.75304100  | -1.22710500 | C  | 0.71899100  | -2.84510500 | 3.55754400  |
| C  | -6.11543100 | 6.52004200  | 0.23348600  | C  | -1.67361800 | -2.77781100 | 3.32102600  |
| H  | -7.13787300 | 5.27604100  | 1.66932000  | C  | 0.65016800  | -4.19498000 | 3.89361400  |
| H  | -4.86102200 | 7.53194600  | -1.20045900 | H  | 1.68325300  | -2.34585600 | 3.50857300  |
| H  | -6.87297300 | 7.29887900  | 0.24495800  | C  | -1.74472900 | -4.13066400 | 3.66019900  |
| C  | -0.31911900 | -0.65706700 | 2.87655900  | H  | -2.59472000 | -2.24175200 | 3.10954800  |
| H  | 0.57122400  | -0.24647200 | 3.35697800  | C  | -0.58420300 | -4.85187900 | 3.94496500  |
| B  | 1.96827100  | -1.01760300 | -1.84176400 | H  | 1.56477500  | -4.73855800 | 4.12062600  |
| O  | 2.98116800  | 0.11966300  | -1.99540100 | H  | -2.71483700 | -4.62126600 | 3.70627500  |
| H  | 3.58009600  | -0.13457200 | -2.71379300 | H  | -0.63923400 | -5.90465300 | 4.21000100  |
| O  | 2.50162200  | -2.14243500 | -1.09758300 | Li | 3.99954600  | 0.52641400  | -0.40813100 |
| H  | 2.59875000  | -1.86244700 | -0.17030400 | C  | 4.34065100  | 3.43966200  | -1.05313300 |
| O  | 0.86025600  | -0.41152800 | -1.02009500 | O  | 4.50826200  | 2.42094100  | -0.36775200 |
| H  | 0.61429000  | 0.46780600  | -1.33829500 | C  | 6.31381900  | -1.45136300 | -0.15760700 |
| C  | 1.46409600  | -1.48910900 | -3.31714700 | O  | 5.71251100  | -0.37548700 | -0.30383100 |
| C  | 1.10519100  | -0.55482100 | -4.30689500 | N  | 7.53019300  | -1.48133400 | 0.45948200  |
| C  | 1.34515700  | -2.84707100 | -3.66292900 | N  | 4.77447100  | 4.65504300  | -0.60937800 |
| C  | 0.64212500  | -0.94467300 | -5.56624500 | C  | 5.72219300  | -2.75152200 | -0.66818400 |
| H  | 1.19645900  | 0.50947700  | -4.08893800 | H  | 6.30787900  | -3.14181300 | -1.50983600 |
| C  | 0.88786300  | -3.25343700 | -4.91953100 | H  | 5.70200500  | -3.52118400 | 0.11070200  |
| H  | 1.62611300  | -3.59457200 | -2.92531000 | H  | 4.69747600  | -2.56459500 | -1.00118300 |
| C  | 0.53084300  | -2.30176800 | -5.87778700 | C  | 8.09584600  | -0.25720500 | 1.01317600  |
| H  | 0.37115200  | -0.19294400 | -6.30567800 | H  | 9.03558300  | -0.00542500 | 0.50412900  |
| H  | 0.81197700  | -4.31386300 | -5.15426000 | H  | 7.38035200  | 0.55192900  | 0.87971400  |
| H  | 0.17403900  | -2.61331700 | -6.85725800 | H  | 8.30520200  | -0.39109200 | 2.08194800  |
| Ni | 0.27646900  | -0.51337200 | 0.95834500  | C  | 8.33649600  | -2.67685600 | 0.64878600  |
| Br | 2.59194400  | -0.05358600 | 1.67595400  | H  | 7.91795800  | -3.52500000 | 0.11068700  |
| C  | -1.50743900 | 0.23547100  | 3.25113000  | H  | 9.35359900  | -2.50149700 | 0.27520100  |
| C  | -1.74998500 | 0.32272900  | 4.77026100  | H  | 8.40625400  | -2.93621600 | 1.71405300  |
| H  | -2.43363100 | -0.09431700 | 2.76220400  | C  | 3.64854100  | 3.35689100  | -2.40353500 |
| H  | -1.31541900 | 1.24742500  | 2.87868200  | H  | 4.35340500  | 3.55718300  | -3.21969000 |
| H  | -2.58311300 | 0.99979100  | 5.00060800  | H  | 3.25548900  | 2.34329500  | -2.51066000 |

|             |             |             |             |   |             |             |             |
|-------------|-------------|-------------|-------------|---|-------------|-------------|-------------|
| H           | 2.82506600  | 4.07389000  | -2.49066300 | H | -0.10973300 | 2.63981000  | 3.65320500  |
| C           | 4.69177400  | 5.89478400  | -1.36439900 | C | -4.99144500 | -3.11210300 | -0.83922200 |
| H           | 5.69231800  | 6.33120900  | -1.48349600 | C | -4.84354700 | -3.88773900 | -2.00071900 |
| H           | 4.27365600  | 5.72755900  | -2.35520800 | C | -6.25772200 | -3.03109800 | -0.23632200 |
| H           | 4.06417100  | 6.62680400  | -0.83836800 | C | -5.93834000 | -4.55827700 | -2.54759200 |
| C           | 5.41217600  | 4.76362600  | 0.69775900  | H | -3.87151200 | -3.94122900 | -2.48342600 |
| H           | 4.90942800  | 5.53452600  | 1.29458800  | C | -7.34871200 | -3.70804900 | -0.78173000 |
| H           | 5.34078000  | 3.80336500  | 1.20492600  | H | -6.38039000 | -2.45006600 | 0.67361500  |
| H           | 6.46844300  | 5.04321000  | 0.58851900  | C | -7.19268700 | -4.47223400 | -1.94024300 |
| <b>TS17</b> |             |             |             | H | -5.81010600 | -5.14706900 | -3.45207500 |
| C           | -2.70171600 | -3.20058900 | 0.10337600  | H | -8.31962000 | -3.64258400 | -0.29768200 |
| C           | -3.80401200 | -2.44302600 | -0.23990600 | H | -8.04345700 | -4.99747300 | -2.36613900 |
| C           | -3.74181700 | -1.04013900 | 0.00568400  | C | -4.67220000 | 4.07507400  | 0.73214400  |
| C           | -2.56176900 | -0.51407000 | 0.60254200  | C | -5.97073300 | 3.83995600  | 1.21470700  |
| C           | -1.55297200 | -2.61073300 | 0.66864200  | C | -4.41798500 | 5.27577500  | 0.04973700  |
| C           | -4.79899000 | -0.15132300 | -0.37462200 | C | -6.98474500 | 4.77690500  | 1.01531100  |
| C           | -2.50892100 | 0.91153400  | 0.92017900  | H | -6.17886800 | 2.92670400  | 1.76485200  |
| C           | -3.62702000 | 1.73842700  | 0.60646400  | C | -5.43419200 | 6.20945200  | -0.15500500 |
| C           | -4.74338600 | 1.17831100  | -0.09340800 | H | -3.41908400 | 5.46653500  | -0.33305400 |
| C           | -3.56312800 | 3.11284300  | 0.98257300  | C | -6.72104800 | 5.96318700  | 0.32714100  |
| C           | -2.41987700 | 3.55250300  | 1.62721700  | H | -7.98085000 | 4.58158000  | 1.40352100  |
| C           | -1.35788300 | 2.66723700  | 1.90765200  | H | -5.22001200 | 7.12882500  | -0.69349600 |
| H           | -5.64843100 | -0.55647000 | -0.91242500 | H | -7.51252700 | 6.69088200  | 0.16972600  |
| H           | -2.71255900 | -4.27332800 | -0.05769500 | C | 0.82346300  | -0.48871700 | 2.97126700  |
| H           | -5.54761000 | 1.83325700  | -0.40826100 | H | 1.12044000  | 0.55773500  | 3.12593300  |
| H           | -2.34934000 | 4.58472900  | 1.95610700  | B | 0.90816900  | -0.83093800 | -1.60756700 |
| N           | -1.48812900 | -1.29628100 | 0.90356400  | O | 1.90919400  | -0.05501600 | -2.43175600 |
| N           | -1.40200100 | 1.38816900  | 1.53703000  | H | 2.08782500  | -0.54129600 | -3.24876700 |
| C           | -0.38237100 | -3.47764900 | 1.03336100  | O | 1.60482700  | -1.63206600 | -0.57375000 |
| H           | -0.28572800 | -3.54592400 | 2.12140400  | H | 2.51626400  | -1.31750900 | -0.46151800 |
| H           | -0.51626600 | -4.48960400 | 0.63957500  | O | 0.07938500  | 0.21264400  | -0.89441400 |
| H           | 0.54255100  | -3.05206500 | 0.63421800  | H | 0.57071700  | 1.05347100  | -0.93479600 |
| C           | -0.16031200 | 3.14732000  | 2.68237200  | C | -0.01948600 | -1.76770100 | -2.55183000 |
| H           | 0.76389900  | 2.91821700  | 2.14316700  | C | -1.12611000 | -1.24091200 | -3.24361300 |
| H           | -0.21443600 | 4.22532600  | 2.86285100  | C | 0.28968100  | -3.11950600 | -2.78650400 |

|    |             |             |             |             |             |             |             |
|----|-------------|-------------|-------------|-------------|-------------|-------------|-------------|
| C  | -1.88343700 | -2.01599400 | -4.12516200 | C           | 4.77707800  | -3.16463700 | -0.27155600 |
| H  | -1.39953000 | -0.20160500 | -3.07565500 | H           | 5.40661800  | -3.89358700 | -0.79324100 |
| C  | -0.45867600 | -3.90864400 | -3.66527500 | H           | 4.74968200  | -3.42004000 | 0.79324900  |
| H  | 1.13250500  | -3.55977200 | -2.25830400 | H           | 3.76058300  | -3.22012500 | -0.66252000 |
| C  | -1.54972300 | -3.35695200 | -4.34167100 | C           | 7.03415100  | -0.06373500 | -0.30161900 |
| H  | -2.73262400 | -1.57741900 | -4.64594900 | H           | 8.01223900  | -0.08107900 | -0.79707200 |
| H  | -0.19109200 | -4.95165500 | -3.82512600 | H           | 6.32720300  | 0.50470900  | -0.90325300 |
| H  | -2.13027100 | -3.96254100 | -5.03486300 | H           | 7.14505600  | 0.42285400  | 0.67604700  |
| Ni | 0.36336600  | -0.21478500 | 1.07678500  | C           | 7.48191100  | -2.34782100 | 0.49850900  |
| Br | 2.47952400  | 1.80357300  | 0.49918700  | H           | 7.05206800  | -3.34236900 | 0.59750900  |
| C  | -0.37441100 | -0.80790600 | 3.87125000  | H           | 8.40358000  | -2.42132600 | -0.09275900 |
| C  | -0.10295100 | -0.60222700 | 5.37355400  | H           | 7.74655600  | -1.98455400 | 1.50016700  |
| H  | -0.72524100 | -1.83557100 | 3.70817100  | C           | 2.62443100  | 3.22922500  | -3.21325400 |
| H  | -1.20756400 | -0.16334500 | 3.57326000  | H           | 2.49130600  | 3.68951000  | -4.19818300 |
| H  | -0.99789100 | -0.81710500 | 5.97199800  | H           | 2.13978800  | 2.25159900  | -3.20137800 |
| H  | 0.70588000  | -1.24942300 | 5.73047800  | H           | 2.13498500  | 3.86012500  | -2.46325600 |
| H  | 0.19360700  | 0.43482100  | 5.57758000  | C           | 4.51804400  | 5.46002400  | -3.26624700 |
| C  | 2.03197400  | -1.35083400 | 3.15500100  | H           | 5.06422200  | 5.83284800  | -4.14253200 |
| C  | 3.32131900  | -0.82013800 | 2.92495800  | H           | 3.45144200  | 5.51170000  | -3.47372300 |
| C  | 1.97107400  | -2.68500300 | 3.61103000  | H           | 4.73676400  | 6.12375200  | -2.41951800 |
| C  | 4.47296600  | -1.57326300 | 3.14534600  | C           | 6.34054800  | 3.94519700  | -2.61710500 |
| H  | 3.40571700  | 0.20166500  | 2.56872400  | H           | 6.57318100  | 4.47651100  | -1.68513000 |
| C  | 3.12179500  | -3.44499300 | 3.82248200  | H           | 6.55886900  | 2.88683900  | -2.49212500 |
| H  | 1.00778000  | -3.13100500 | 3.83619100  | H           | 6.96235300  | 4.35960600  | -3.41992900 |
| C  | 4.38562200  | -2.89523000 | 3.59528600  | <b>CP29</b> |             |             |             |
| H  | 5.44723600  | -1.11532800 | 2.98343900  | C           | 0.63740000  | 3.55331400  | 0.56985800  |
| H  | 3.02970200  | -4.46615700 | 4.18613700  | C           | 1.96176000  | 3.15257100  | 0.50630300  |
| H  | 5.28361300  | -3.47809100 | 3.78798500  | C           | 2.22842500  | 1.79539100  | 0.14782500  |
| Li | 3.46985300  | 0.62929500  | -1.50619500 | C           | 1.11021500  | 0.93858000  | -0.05426900 |
| C  | 4.08971700  | 3.03327900  | -2.87041700 | C           | -0.41260400 | 2.64194100  | 0.31552400  |
| O  | 4.51459600  | 1.91554800  | -2.52432200 | C           | 3.54708800  | 1.28866800  | -0.08289900 |
| C  | 5.26989500  | -1.74362900 | -0.47280800 | C           | 1.33010200  | -0.45578400 | -0.41369600 |
| O  | 4.50365800  | -0.88747200 | -0.94486100 | C           | 2.65945000  | -0.91950200 | -0.61920300 |
| N  | 6.54919300  | -1.43124700 | -0.14016600 | C           | 3.75111400  | -0.00460400 | -0.45837800 |
| N  | 4.93110500  | 4.09956800  | -2.95603700 | C           | 2.84550300  | -2.27253000 | -1.03269100 |

|   |             |             |             |    |             |             |             |
|---|-------------|-------------|-------------|----|-------------|-------------|-------------|
| C | 1.71135000  | -3.02730200 | -1.27859700 | H  | 7.08857300  | -3.52134500 | 0.46398000  |
| C | 0.42191200  | -2.51246700 | -1.04668400 | H  | 5.96911200  | -4.65214800 | -3.53332400 |
| H | 4.39094900  | 1.96319200  | 0.00747700  | H  | 7.63669300  | -4.64457700 | -1.68694200 |
| H | 0.39737600  | 4.57663900  | 0.84231300  | C  | -1.30784700 | -1.17686800 | 1.85724000  |
| H | 4.75509700  | -0.35306000 | -0.66995200 | H  | -0.23108200 | -1.36776500 | 1.94866400  |
| H | 1.80960200  | -4.05478100 | -1.61299900 | B  | -3.71432200 | -0.09148000 | -1.39498100 |
| N | -0.16699900 | 1.36703000  | 0.03152900  | O  | -4.48765200 | -1.21631100 | -1.87114200 |
| N | 0.24475500  | -1.27159900 | -0.57374700 | H  | -5.29735200 | -0.90688500 | -2.29611000 |
| C | -1.84905000 | 3.08758100  | 0.34772700  | O  | -3.46538000 | -0.29308000 | 0.11849300  |
| H | -2.20151200 | 3.30734800  | -0.66745700 | H  | -3.90820700 | -1.12374700 | 0.36323700  |
| H | -2.49052500 | 2.29266400  | 0.73415200  | O  | -2.29029100 | -0.22171100 | -1.91784000 |
| H | -1.97385800 | 3.99018400  | 0.95440700  | H  | -2.30284800 | -0.99803500 | -2.49806200 |
| C | -0.78435800 | -3.36187500 | -1.34767600 | C  | -4.34872500 | 1.35876600  | -1.69523700 |
| H | -1.56276000 | -3.23345800 | -0.59264400 | C  | -3.93210700 | 2.13756500  | -2.78934500 |
| H | -1.21150100 | -3.07804800 | -2.31830800 | C  | -5.40030500 | 1.87003800  | -0.91266500 |
| H | -0.51307900 | -4.42018400 | -1.40408600 | C  | -4.53125900 | 3.36413400  | -3.09094800 |
| C | 3.04064600  | 4.13352500  | 0.80447500  | H  | -3.11299900 | 1.77506500  | -3.40649500 |
| C | 3.06662200  | 5.37280500  | 0.14395800  | C  | -6.00843900 | 3.09370400  | -1.20292300 |
| C | 4.01794700  | 3.87107100  | 1.77962900  | H  | -5.74112400 | 1.30201700  | -0.04865000 |
| C | 4.04724000  | 6.31882600  | 0.44219700  | C  | -5.57455400 | 3.84650700  | -2.29694800 |
| H | 2.32179300  | 5.58484800  | -0.61818200 | H  | -4.18496600 | 3.94430300  | -3.94410300 |
| C | 4.99441700  | 4.82034700  | 2.08127600  | H  | -6.81715600 | 3.46299000  | -0.57551200 |
| H | 3.99609300  | 2.92787700  | 2.31834000  | H  | -6.04358000 | 4.80051100  | -2.52706500 |
| C | 5.01410800  | 6.04583100  | 1.41180900  | Ni | -1.57784000 | -0.67968000 | -0.05305800 |
| H | 4.05654000  | 7.26872800  | -0.08538000 | C  | -2.04747600 | -2.44825800 | 2.12185200  |
| H | 5.73609400  | 4.60433900  | 2.84552400  | C  | -1.38184600 | -3.69197100 | 2.07030800  |
| H | 5.77655000  | 6.78365700  | 1.64589800  | C  | -3.42604100 | -2.48169000 | 2.43090800  |
| C | 4.18633900  | -2.88976700 | -1.21684100 | C  | -2.05265100 | -4.89594100 | 2.27718400  |
| C | 5.13691100  | -2.89023400 | -0.18174100 | H  | -0.31183800 | -3.70350200 | 1.87053800  |
| C | 4.50195300  | -3.53945500 | -2.42136600 | C  | -4.10040600 | -3.68587500 | 2.63785800  |
| C | 6.36919100  | -3.52124100 | -0.35031100 | H  | -3.97295900 | -1.54841800 | 2.53373200  |
| H | 4.89821800  | -2.41350900 | 0.76467400  | C  | -3.42218400 | -4.90365800 | 2.55566200  |
| C | 5.73803000  | -4.16307200 | -2.59101900 | H  | -1.50184200 | -5.83298200 | 2.23214600  |
| H | 3.77911300  | -3.53799000 | -3.23264200 | H  | -5.16183100 | -3.67004400 | 2.87435400  |
| C | 6.67493600  | -4.15650400 | -1.55592700 | H  | -3.94729100 | -5.84059600 | 2.72024400  |

|             |             |             |             |    |             |             |             |
|-------------|-------------|-------------|-------------|----|-------------|-------------|-------------|
| C           | -1.68450800 | 0.00731200  | 2.75851600  | C  | 3.07885800  | 4.59467600  | -1.95583200 |
| C           | -1.41240200 | -0.24251200 | 4.25343600  | C  | 3.67471500  | 3.96472700  | 0.29957700  |
| H           | -2.73791300 | 0.27598200  | 2.61851500  | C  | 4.04422800  | 5.60133300  | -1.92968300 |
| H           | -1.11007800 | 0.88428600  | 2.44168200  | H  | 2.47901700  | 4.44051300  | -2.84865200 |
| H           | -1.67096800 | 0.63848400  | 4.85476600  | C  | 4.63376000  | 4.97704700  | 0.32708000  |
| H           | -1.99450500 | -1.09062400 | 4.63034300  | H  | 3.51992200  | 3.34148700  | 1.17579500  |
| H           | -0.35203000 | -0.46635300 | 4.42782600  | C  | 4.82400100  | 5.79603500  | -0.78811600 |
| <b>TS18</b> |             |             |             | H  | 4.18722500  | 6.23240300  | -2.80256700 |
| C           | 0.52126600  | 3.08912800  | -1.17212600 | H  | 5.22884300  | 5.12920200  | 1.22340900  |
| C           | 1.81816800  | 2.72169300  | -0.86908800 | H  | 5.57372300  | 6.58207500  | -0.76640600 |
| C           | 2.06682400  | 1.34092300  | -0.60918600 | C  | 4.07159100  | -3.41447800 | 0.35753300  |
| C           | 0.96145800  | 0.44128700  | -0.61158600 | C  | 4.77110300  | -2.98323500 | 1.49743500  |
| C           | -0.53459600 | 2.16021000  | -1.10883100 | C  | 4.61989300  | -4.45054900 | -0.41587100 |
| C           | 3.39013500  | 0.83363000  | -0.40253700 | C  | 5.98626300  | -3.57044800 | 1.84976000  |
| C           | 1.21672400  | -0.98907100 | -0.46819600 | H  | 4.34796300  | -2.19965700 | 2.11963400  |
| C           | 2.54142100  | -1.43344300 | -0.18601700 | C  | 5.83865900  | -5.03212400 | -0.06642800 |
| C           | 3.61597200  | -0.48892100 | -0.17644900 | H  | 4.09201300  | -4.78755100 | -1.30378200 |
| C           | 2.74897000  | -2.83488400 | -0.00347300 | C  | 6.52550300  | -4.59406400 | 1.06744000  |
| C           | 1.66249000  | -3.67168700 | -0.17958200 | H  | 6.50868200  | -3.23162500 | 2.74028900  |
| C           | 0.39261800  | -3.15298400 | -0.51737300 | H  | 6.25203600  | -5.82662300 | -0.68175600 |
| H           | 4.22341200  | 1.52486300  | -0.44692900 | H  | 7.47355600  | -5.04868700 | 1.34134400  |
| H           | 0.29124700  | 4.12430100  | -1.40043200 | Ni | -2.01033500 | -0.23040200 | -0.49227400 |
| H           | 4.62830500  | -0.84841400 | -0.03245000 | C  | -2.10350400 | 0.01277900  | 1.50287300  |
| H           | 1.77803800  | -4.74261300 | -0.04217100 | C  | -6.03469600 | -0.16075600 | 0.44460400  |
| N           | -0.32256100 | 0.87962300  | -0.77747400 | C  | -4.91122300 | -0.00068900 | -0.36568300 |
| N           | 0.18308200  | -1.84576300 | -0.65411900 | C  | -3.94401900 | -1.01885900 | -0.54062200 |
| C           | -1.93744200 | 2.61459900  | -1.40649000 | C  | -4.19066100 | -2.22521500 | 0.14936300  |
| H           | -1.93851700 | 3.64836100  | -1.76563100 | C  | -5.30736000 | -2.40563000 | 0.96824500  |
| H           | -2.38043000 | 1.96986900  | -2.17102200 | C  | -6.23095900 | -1.36876500 | 1.12234000  |
| H           | -2.55979600 | 2.56081200  | -0.50753800 | H  | -6.75634600 | 0.64652900  | 0.55153100  |
| C           | -0.77473000 | -4.08943300 | -0.68229600 | H  | -4.78309900 | 0.95270100  | -0.87929300 |
| H           | -1.28836700 | -4.21026200 | 0.28173000  | H  | -3.49269800 | -3.04895300 | 0.02750000  |
| H           | -1.50429600 | -3.70160600 | -1.39744500 | H  | -5.46222400 | -3.35096100 | 1.48443700  |
| H           | -0.43992200 | -5.08290300 | -0.99944100 | H  | -7.10293500 | -1.50253400 | 1.75834400  |
| C           | 2.88495000  | 3.75900200  | -0.84422000 | B  | -3.33821400 | -1.32631200 | -2.43072200 |

|             |             |             |             |   |             |             |             |
|-------------|-------------|-------------|-------------|---|-------------|-------------|-------------|
| O           | -4.40795800 | -0.84893600 | -3.20892500 | C | 1.32400500  | 2.97092800  | -0.75805500 |
| H           | -4.50617600 | 0.10826700  | -3.12963500 | C | 0.02794500  | 3.21566100  | -1.19698400 |
| O           | -3.08511100 | -2.70795800 | -2.57099500 | C | -0.92133200 | 2.18275800  | -1.31147900 |
| H           | -3.89716000 | -3.14509000 | -2.86350300 | H | 4.34158800  | -0.43774100 | 0.17186800  |
| O           | -2.09765800 | -0.54557600 | -2.47066900 | H | 1.82205300  | -4.49794700 | -0.67089900 |
| C           | -1.97889900 | 1.44101000  | 1.93382000  | H | 3.80330800  | 1.92336700  | -0.09888300 |
| C           | -0.74830400 | 2.06022200  | 2.23564700  | H | -0.28269800 | 4.23472000  | -1.40585700 |
| C           | -3.13657400 | 2.23888100  | 2.07117300  | N | 0.03779600  | -1.66160100 | -0.97229700 |
| C           | -0.67657200 | 3.39690900  | 2.63118800  | N | -0.60634100 | 0.91721300  | -1.00792900 |
| H           | 0.17013800  | 1.48362300  | 2.16773300  | C | -0.62524700 | -3.89968300 | -1.68372800 |
| C           | -3.06901800 | 3.57536300  | 2.46189200  | H | -0.74368000 | -3.65338400 | -2.74699500 |
| H           | -4.10506600 | 1.78553800  | 1.87329500  | H | -0.29173100 | -4.93916600 | -1.60824400 |
| C           | -1.83486800 | 4.16887500  | 2.74242000  | H | -1.61372800 | -3.80368900 | -1.22909700 |
| H           | 0.29231800  | 3.83675400  | 2.85880900  | C | -2.32962100 | 2.47350000  | -1.75158800 |
| H           | -3.98551600 | 4.15333500  | 2.56020200  | H | -2.99624200 | 2.57440100  | -0.88809200 |
| H           | -1.77874400 | 5.20875900  | 3.05368200  | H | -2.37464000 | 3.40568000  | -2.32412200 |
| C           | -1.14434700 | -0.96860500 | 2.19376100  | H | -2.70552200 | 1.65430100  | -2.37200000 |
| C           | -1.37091500 | -1.08130700 | 3.71300000  | C | 3.93276300  | -3.10939100 | 0.24353400  |
| H           | -0.09622400 | -0.69980900 | 2.00971700  | C | 4.49418200  | -2.72563100 | 1.47436000  |
| H           | -1.27741400 | -1.96161300 | 1.74792600  | C | 4.61411400  | -4.06298600 | -0.53230200 |
| H           | -0.68532800 | -1.80970500 | 4.16581500  | C | 5.69853900  | -3.27619700 | 1.91202800  |
| H           | -1.21857000 | -0.11786800 | 4.21217200  | H | 3.96924800  | -2.00884600 | 2.09941000  |
| H           | -2.39616100 | -1.40668300 | 3.92852900  | C | 5.82040400  | -4.60997900 | -0.09574500 |
| H           | -3.12284400 | -0.30972500 | 1.72403000  | H | 4.20092500  | -4.35997400 | -1.49234700 |
| H           | -1.35125100 | -1.15002900 | -2.62094300 | C | 6.36735100  | -4.21877300 | 1.12806600  |
| <b>CP30</b> |             |             |             | H | 6.11084900  | -2.97332000 | 2.87084500  |
| C           | 1.62963500  | -3.42949800 | -0.64642700 | H | 6.33558400  | -5.33938000 | -0.71509900 |
| C           | 2.62741900  | -2.56517900 | -0.21061500 | H | 7.30660100  | -4.64579300 | 1.46874500  |
| C           | 2.34013500  | -1.16852300 | -0.25825600 | C | 2.26153500  | 4.10886300  | -0.56722400 |
| C           | 1.02329400  | -0.78014900 | -0.61934200 | C | 2.43551000  | 5.05978400  | -1.58689900 |
| C           | 0.36869500  | -2.96077100 | -1.05973900 | C | 2.95184000  | 4.29224300  | 0.64359200  |
| C           | 3.32308000  | -0.14303800 | -0.05509900 | C | 3.28012700  | 6.15480400  | -1.40603700 |
| C           | 0.69166400  | 0.62303400  | -0.70591400 | H | 1.91692400  | 4.92540700  | -2.53225600 |
| C           | 1.69432300  | 1.61159600  | -0.53120100 | C | 3.79232600  | 5.39036500  | 0.82536600  |
| C           | 3.02172400  | 1.17942600  | -0.20303900 | H | 2.80912100  | 3.58194100  | 1.45298600  |



|    |             |             |             |             |             |             |             |
|----|-------------|-------------|-------------|-------------|-------------|-------------|-------------|
| C  | 3.96175800  | 6.32408000  | -0.19924300 | H           | -5.99526000 | -3.83584100 | -1.99196700 |
| H  | 3.40812900  | 6.87411000  | -2.21050000 | <b>TS19</b> |             |             |             |
| H  | 4.30996500  | 5.51985100  | 1.77207900  | C           | -0.11408400 | 3.54957000  | -0.63595800 |
| H  | 4.61873500  | 7.17780200  | -0.05749400 | C           | -1.39726400 | 3.13185100  | -0.31794600 |
| Ni | -1.78780400 | -0.65174300 | -0.56669800 | C           | -1.64888800 | 1.72690600  | -0.35048700 |
| C  | -1.81670100 | -1.04763100 | 3.73456200  | C           | -0.54697100 | 0.86520700  | -0.59030500 |
| C  | -1.60437300 | -1.12342000 | 2.21210700  | C           | -2.95826300 | 1.15478600  | -0.23833700 |
| H  | -2.67495600 | -1.65888800 | 4.04049600  | C           | -0.76480800 | -0.56107400 | -0.69361600 |
| H  | -0.93475100 | -1.41616900 | 4.27253200  | C           | -2.07811900 | -1.09098600 | -0.59181200 |
| C  | -2.83372100 | -0.64774500 | 1.41334400  | C           | -3.16525400 | -0.18772100 | -0.35934500 |
| H  | -2.00765000 | -0.02006000 | 4.06219100  | C           | -2.24281500 | -2.49348700 | -0.80038800 |
| H  | -1.38551200 | -2.16222600 | 1.93958900  | C           | -1.12014900 | -3.21973200 | -1.16881800 |
| H  | -0.70817600 | -0.55391200 | 1.94127400  | C           | 0.15193400  | -2.61803700 | -1.23878100 |
| H  | -3.69097000 | -1.15986500 | 1.85597500  | H           | -3.80454200 | 1.81724500  | -0.09572400 |
| C  | -3.16630200 | 0.81937300  | 1.48797600  | H           | 0.11229700  | 4.61143600  | -0.66583500 |
| C  | -4.50697000 | 1.23211000  | 1.33238900  | H           | -4.17375600 | -0.58273700 | -0.31438400 |
| C  | -2.22129000 | 1.81723600  | 1.80178700  | H           | -1.20985100 | -4.28370400 | -1.36826100 |
| C  | -4.87617700 | 2.57272800  | 1.44267600  | N           | 0.72901400  | 1.30912200  | -0.80371800 |
| H  | -5.26776000 | 0.48306400  | 1.12889300  | N           | 0.33298700  | -1.32785500 | -0.94814200 |
| C  | -2.59246300 | 3.15464400  | 1.93144800  | C           | 1.34992000  | -3.43946400 | -1.63415800 |
| H  | -1.18068000 | 1.54584900  | 1.94987600  | H           | 1.66495500  | -4.10578600 | -0.82130300 |
| C  | -3.92118200 | 3.54700300  | 1.74291800  | H           | 1.11665100  | -4.07261600 | -2.49817900 |
| H  | -5.91868900 | 2.85355400  | 1.31188800  | H           | 2.18738100  | -2.78586900 | -1.88565600 |
| H  | -1.83712200 | 3.89531200  | 2.18370000  | C           | -2.44423900 | 4.13651900  | 0.00352000  |
| H  | -4.20852500 | 4.59012800  | 1.84404500  | C           | -3.21100300 | 4.03987400  | 1.17794600  |
| C  | -3.28020300 | -1.66805400 | -0.15241100 | C           | -2.65284000 | 5.23875000  | -0.84256800 |
| C  | -3.43007500 | -3.05533500 | 0.11944400  | C           | -4.15772900 | 5.01442200  | 1.49296500  |
| C  | -4.22239000 | -1.07761900 | -1.03914700 | H           | -3.04524400 | 3.20761600  | 1.85614800  |
| C  | -4.39008700 | -3.81633500 | -0.53623400 | C           | -3.60307700 | 6.21032900  | -0.52900300 |
| H  | -2.78257600 | -3.53274600 | 0.85261600  | H           | -2.07633200 | 5.32060900  | -1.75994900 |
| C  | -5.15532300 | -1.86373600 | -1.72821600 | C           | -4.35904400 | 6.10177800  | 0.63994200  |
| H  | -4.24843500 | 0.00193600  | -1.16190200 | H           | -4.73385700 | 4.92722100  | 2.41030500  |
| C  | -5.24831700 | -3.23273700 | -1.48317100 | H           | -3.75531300 | 7.05067500  | -1.20104000 |
| H  | -4.47166500 | -4.87941500 | -0.31736900 | H           | -5.09850200 | 6.85919500  | 0.88514700  |
| H  | -5.83730900 | -1.38990600 | -2.43177400 | C           | -3.55210600 | -3.18396900 | -0.65931200 |

|    |             |             |             |           |             |             |             |
|----|-------------|-------------|-------------|-----------|-------------|-------------|-------------|
| C  | -4.03263900 | -4.00897000 | -1.68971100 | C         | 4.50431300  | -3.12021000 | 2.21778300  |
| C  | -4.30974600 | -3.07247400 | 0.51936500  | H         | 4.90647000  | -2.32150600 | 0.25628400  |
| C  | -5.23889900 | -4.69532600 | -1.55045200 | H         | 3.33651800  | -3.07680700 | 0.39267500  |
| H  | -3.46257400 | -4.09549200 | -2.61074200 | H         | 4.94730400  | -4.10046400 | 2.00333600  |
| C  | -5.51291900 | -3.76390100 | 0.65977100  | H         | 5.26481700  | -2.51759100 | 2.72959100  |
| H  | -3.93964800 | -2.45816600 | 1.33525100  | H         | 3.67417600  | -3.26981700 | 2.91659000  |
| C  | -5.98311300 | -4.57531300 | -0.37515600 | H         | 4.13712200  | -0.49666400 | 1.80578100  |
| H  | -5.59874800 | -5.32138600 | -2.36252900 | C         | 0.92275100  | 2.63186500  | -0.89853400 |
| H  | -6.08041000 | -3.67311500 | 1.58208200  | C         | 2.28065900  | 3.13509700  | -1.29828100 |
| H  | -6.92205700 | -5.11101600 | -0.26574400 | H         | 2.92045000  | 3.29882600  | -0.42482900 |
| Ni | 2.03844400  | -0.23939500 | -0.29657300 | H         | 2.79191200  | 2.40596500  | -1.92986800 |
| C  | 3.44386500  | -1.04194100 | 1.16314000  | H         | 2.19307000  | 4.08649800  | -1.83405900 |
| C  | 3.89819900  | 0.13915200  | -0.24275800 | <b>4b</b> |             |             |             |
| C  | 4.56422200  | 1.30479400  | 0.22790800  | C         | 3.63153300  | -0.32302800 | 0.80955500  |
| C  | 4.39659800  | -0.41689400 | -1.45285400 | C         | 2.42080400  | 0.33729400  | 1.02626400  |
| C  | 5.57323900  | 1.92037700  | -0.50145400 | C         | 1.33501100  | 0.16455500  | 0.15668800  |
| H  | 4.27567000  | 1.72973800  | 1.18836100  | C         | 1.49392200  | -0.69500900 | -0.93902100 |
| C  | 5.38750100  | 0.22617000  | -2.20291900 | C         | 2.70280700  | -1.35633100 | -1.16055800 |
| H  | 4.00563400  | -1.36580300 | -1.81185600 | C         | 3.77729600  | -1.17316700 | -0.28761300 |
| C  | 5.98306700  | 1.39881400  | -1.73810300 | H         | 4.45783800  | -0.17597500 | 1.50050000  |
| H  | 6.04873100  | 2.81702700  | -0.10793300 | H         | 2.31575100  | 0.99786700  | 1.88478600  |
| H  | 5.71304900  | -0.21310600 | -3.14409600 | H         | 0.66109600  | -0.86127600 | -1.61635300 |
| H  | 6.77505000  | 1.88020900  | -2.30537700 | H         | 2.80302800  | -2.02068000 | -2.01522300 |
| C  | 2.10706700  | -0.98846800 | 1.87565700  | H         | 4.71694700  | -1.69177900 | -0.45848900 |
| C  | 1.24743500  | -2.10253700 | 2.01620700  | C         | 0.04183900  | 0.95018200  | 0.39324200  |
| C  | 1.73619300  | 0.19220300  | 2.56799000  | C         | 0.04076800  | 2.24531700  | -0.45726300 |
| C  | 0.06752700  | -2.02275600 | 2.75323800  | H         | 0.06269900  | 1.27178500  | 1.44388300  |
| H  | 1.50661000  | -3.04336500 | 1.54158100  | C         | -1.10511200 | 3.20915400  | -0.13015400 |
| C  | 0.55111000  | 0.27284000  | 3.29420300  | H         | 1.00043600  | 2.74949300  | -0.28794600 |
| H  | 2.40264800  | 1.05068600  | 2.53670400  | H         | 0.02917200  | 1.98833300  | -1.52440900 |
| C  | -0.29961600 | -0.83319700 | 3.38881100  | H         | -1.02894000 | 4.12249000  | -0.73125100 |
| H  | -0.56580500 | -2.90299400 | 2.83932600  | H         | -2.08348200 | 2.75790800  | -0.32500900 |
| H  | 0.29838700  | 1.19990000  | 3.80389200  | H         | -1.08065100 | 3.50364800  | 0.92654400  |
| H  | -1.21784200 | -0.77618900 | 3.96715400  | C         | -1.20517300 | 0.08203300  | 0.23126600  |
| C  | 4.04384300  | -2.43059100 | 0.92331100  | C         | -1.66655700 | -0.66015300 | 1.32873600  |

|            |             |             |             |             |             |             |             |
|------------|-------------|-------------|-------------|-------------|-------------|-------------|-------------|
| C          | -1.90190000 | -0.03560400 | -0.97997500 | H           | -4.38176000 | 3.49096800  | 0.46742500  |
| C          | -2.77888700 | -1.49453900 | 1.22381800  | C           | 3.72345900  | -1.45612100 | 0.07401400  |
| H          | -1.14043000 | -0.58357100 | 2.27793500  | C           | 3.54795800  | -2.53262600 | -0.81499600 |
| C          | -3.01712100 | -0.87036500 | -1.09116300 | C           | 4.78825500  | -1.52037800 | 0.99083400  |
| H          | -1.58204000 | 0.53307300  | -1.84860400 | C           | 4.40142000  | -3.63499000 | -0.78111800 |
| C          | -3.46016700 | -1.60392100 | 0.00944600  | H           | 2.75288400  | -2.48988000 | -1.55377400 |
| H          | -3.11533400 | -2.05700500 | 2.09104100  | C           | 5.64033500  | -2.62371800 | 1.02516500  |
| H          | -3.54118700 | -0.94217400 | -2.04089500 | H           | 4.93137000  | -0.70395800 | 1.69352000  |
| H          | -4.32928600 | -2.25064800 | -0.0761220  | C           | 5.44986700  | -3.68699600 | 0.14026000  |
| <b>CP0</b> |             |             |             | H           | 4.25228000  | -4.45106900 | -1.48337700 |
| C          | 3.44718300  | 1.01435500  | -0.03623900 | H           | 6.45074500  | -2.65493400 | 1.74880100  |
| C          | 2.85772800  | -0.25208400 | 0.02136300  | H           | 6.11333400  | -4.54713000 | 0.16670800  |
| C          | 1.43354700  | -0.30668300 | 0.03063100  | C           | -3.72556800 | -1.45450000 | 0.00926800  |
| C          | 0.71462300  | 0.91374100  | -0.06982100 | C           | -4.78976000 | -1.58702200 | 0.91922500  |
| C          | 2.68449000  | 2.17646200  | -0.19073900 | C           | -3.54271400 | -2.46650000 | -0.95075100 |
| C          | 0.67822700  | -1.51816900 | 0.17783500  | C           | -5.63471700 | -2.69530000 | 0.87817500  |
| C          | -0.71809400 | 0.92024200  | 0.03999500  | H           | -4.93868600 | -0.82053000 | 1.67497900  |
| C          | -1.43914200 | -0.30316400 | 0.04950100  | C           | -4.38976600 | -3.57387800 | -0.99259900 |
| C          | -0.68553100 | -1.52026700 | 0.15206400  | H           | -2.74596200 | -2.36931900 | -1.68259200 |
| C          | -2.86266100 | -0.24699400 | 0.04087700  | C           | -5.43787200 | -3.69445300 | -0.07768600 |
| C          | -3.45265500 | 1.01920700  | 0.05827200  | H           | -6.44488700 | -2.78098300 | 1.59763700  |
| C          | -2.68704200 | 2.18896000  | 0.11985500  | H           | -4.23518500 | -4.33975100 | -1.74819100 |
| H          | 1.21235600  | -2.45114800 | 0.31684600  | H           | -6.09642500 | -4.55813700 | -0.11049400 |
| H          | 4.52976100  | 1.09487100  | -0.05711000 | Ni          | -0.00019400 | 3.48766800  | -0.12158200 |
| H          | -1.22252600 | -2.45581400 | 0.26063100  | <b>CPI'</b> |             |             |             |
| H          | -4.53508000 | 1.10241000  | 0.04694900  | C           | 0.87831500  | -3.41736900 | 0.55215400  |
| N          | 1.33821400  | 2.13151400  | -0.28053300 | C           | 2.16097100  | -2.86039200 | 0.40351300  |
| N          | -1.33963200 | 2.15070700  | 0.16223600  | C           | 2.22229700  | -1.46820300 | 0.13921800  |
| C          | 3.32677900  | 3.52886800  | -0.33472600 | C           | 1.00250900  | -0.73366900 | 0.07505900  |
| H          | 4.38915500  | 3.45163300  | -0.58715600 | C           | -0.27403400 | -2.63662200 | 0.52543700  |
| H          | 2.80743500  | 4.10192700  | -1.11378500 | C           | 3.44014400  | -0.74851800 | -0.10847700 |
| H          | 3.24453800  | 4.10306700  | 0.59731000  | C           | 1.00766400  | 0.65181000  | -0.23816100 |
| C          | -3.32868400 | 3.54857400  | 0.17407800  | C           | 2.23485800  | 1.36737300  | -0.34291600 |
| H          | -2.78592700 | 4.18366700  | 0.88570100  | C           | 3.44872800  | 0.60028600  | -0.30718000 |
| H          | -3.28005700 | 4.04444700  | -0.80406600 | C           | 2.18815100  | 2.76568300  | -0.57931400 |

|   |             |             |             |    |             |             |             |
|---|-------------|-------------|-------------|----|-------------|-------------|-------------|
| C | 0.91345200  | 3.32986700  | -0.75970400 | H  | 4.70003800  | 6.15589500  | -2.55228900 |
| C | -0.24890300 | 2.56558000  | -0.70664300 | H  | 6.28063000  | 4.35614500  | 1.02108100  |
| H | 4.37371600  | -1.29879800 | -0.14595200 | H  | 6.48769900  | 6.01779500  | -0.82269200 |
| H | 0.78654800  | -4.47195900 | 0.79582800  | Ni | -1.71248600 | -0.00342100 | -0.02508200 |
| H | 4.38937400  | 1.10649200  | -0.49449800 | N  | -4.62608400 | -2.56877700 | -1.92347000 |
| H | 0.82877600  | 4.39300000  | -0.96582700 | C  | -3.89029100 | -2.59966400 | -3.18241800 |
| N | -0.24116700 | -1.29437900 | 0.32905700  | H  | -4.54684600 | -2.31030300 | -4.01333000 |
| N | -0.23431100 | 1.22971000  | -0.46486800 | H  | -3.05403100 | -1.90594000 | -3.11793800 |
| C | -1.61392900 | -3.26116000 | 0.80506700  | H  | -3.51273500 | -3.61194100 | -3.37648800 |
| H | -1.50421900 | -4.24351100 | 1.27621800  | C  | -5.77078500 | -3.46094800 | -1.85088300 |
| H | -2.19581900 | -2.60597800 | 1.46462800  | H  | -6.29215200 | -3.36034700 | -0.90052000 |
| H | -2.19335400 | -3.39373500 | -0.11698700 | H  | -6.47993700 | -3.23526900 | -2.65872000 |
| C | -1.58427500 | 3.20622400  | -0.97212000 | H  | -5.45391900 | -4.50696400 | -1.96327800 |
| H | -2.20599600 | 2.52788400  | -1.56887000 | C  | -4.20283600 | -1.75359500 | -0.90896200 |
| H | -2.12537100 | 3.41083300  | -0.03982100 | O  | -3.21380800 | -1.01960300 | -1.06449500 |
| H | -1.46990700 | 4.15651700  | -1.50450300 | C  | -4.96643100 | -1.76332700 | 0.40323200  |
| C | 3.34960400  | -3.73288100 | 0.54297700  | H  | -4.45521700 | -1.07915300 | 1.08067500  |
| C | 4.44047800  | -3.38700800 | 1.36454600  | H  | -6.00388100 | -1.43289400 | 0.27347700  |
| C | 3.38990900  | -4.98246500 | -0.10581000 | H  | -4.98631200 | -2.76193400 | 0.85365600  |
| C | 5.52771600  | -4.24659200 | 1.51749500  | N  | -4.11779200 | 2.80191900  | 2.17005600  |
| H | 4.41775700  | -2.44729600 | 1.90812700  | C  | -3.19734800 | 2.75148800  | 3.30047600  |
| C | 4.47590500  | -5.84275700 | 0.04888900  | H  | -3.72531400 | 2.44785700  | 4.21453100  |
| H | 2.56475500  | -5.26567900 | -0.75378300 | H  | -2.40941500 | 2.03295900  | 3.08165300  |
| C | 5.55339500  | -5.47878400 | 0.85978500  | H  | -2.75758800 | 3.74237300  | 3.46766900  |
| H | 6.35281500  | -3.95722000 | 2.16381000  | C  | -5.17788200 | 3.79025500  | 2.27435800  |
| H | 4.48397900  | -6.79731500 | -0.47180100 | H  | -5.83456800 | 3.75972000  | 1.40654000  |
| H | 6.40122500  | -6.14797800 | 0.98026500  | H  | -5.78413300 | 3.60839700  | 3.17260400  |
| C | 3.38793900  | 3.63014400  | -0.65399800 | H  | -4.75417100 | 4.80037200  | 2.35279200  |
| C | 3.51797300  | 4.58545800  | -1.68114500 | C  | -3.97333100 | 1.91474000  | 1.13863000  |
| C | 4.40720900  | 3.57096800  | 0.31699800  | O  | -3.07725400 | 1.05594800  | 1.16747200  |
| C | 4.62108500  | 5.43514800  | -1.74194300 | C  | -4.92505500 | 2.00020700  | -0.04162400 |
| H | 2.75144800  | 4.64066600  | -2.44947800 | H  | -4.57813200 | 1.28242700  | -0.78554400 |
| C | 5.51201200  | 4.41954800  | 0.25459200  | H  | -5.95349200 | 1.75079400  | 0.24648100  |
| H | 4.31441500  | 2.86835700  | 1.13983600  | H  | -4.93493200 | 2.99913600  | -0.49075600 |
| C | 5.62676300  | 5.35623000  | -0.77508500 |    |             |             |             |

**Ph-B(OH)<sub>2</sub>**

|                  |             |             |             |   |             |             |             |
|------------------|-------------|-------------|-------------|---|-------------|-------------|-------------|
| C                | -1.95010600 | -1.20679200 | 0.00981700  |   |             |             |             |
| C                | -0.55405400 | -1.20271400 | 0.00970200  | H | 3.15215200  | 1.06752200  | 0.34698400  |
| C                | 0.17171800  | -0.00003500 | -0.00000300 | H | 3.06799400  | 0.36344600  | -1.29075300 |
| C                | -0.55404500 | 1.20266000  | -0.00969800 | C | 2.25091800  | 3.79173600  | 0.44953600  |
| C                | -1.95007500 | 1.20677500  | -0.00981500 | H | 1.98275400  | 4.85042100  | 0.50559100  |
| C                | -2.65202100 | 0.00000600  | -0.00000300 | H | 2.13183500  | 3.31067800  | 1.42883100  |
| H                | -2.48929300 | -2.15088000 | 0.01751300  | H | 3.29624600  | 3.72623800  | 0.13979800  |
| H                | -0.02412900 | -2.15303300 | 0.01730200  | C | -0.01193900 | 3.59195600  | -0.51846200 |
| H                | -0.02409000 | 2.15296900  | -0.01729300 | H | -0.52971600 | 3.17886300  | -1.38379700 |
| H                | -2.48923700 | 2.15086500  | -0.01751200 | H | -0.53921700 | 3.26654600  | 0.38854200  |
| H                | -3.73914500 | 0.00001500  | -0.00000400 | H | -0.02204000 | 4.68504300  | -0.57297900 |
| B                | 1.74347800  | 0.00002600  | -0.00000200 | C | -4.51884700 | -1.17861500 | -0.84597500 |
| O                | 2.39142800  | -0.01985100 | -1.20975800 | H | -5.23600900 | -1.08854300 | -0.03168200 |
| H                | 3.35859300  | -0.02045500 | -1.14735900 | H | -5.01278000 | -0.87191600 | -1.77627600 |
| O                | 2.39142400  | 0.02020600  | 1.20975300  | H | -4.23696900 | -2.23628500 | -0.94362600 |
| H                | 3.35859000  | 0.01814500  | 1.14740300  | C | -2.34084000 | -0.37753200 | -1.67837400 |
| <b>LiOH 3DMA</b> |             |             |             | H | -1.65725300 | 0.46287600  | -1.56647300 |
| O                | 1.25547100  | 0.94827600  | 1.76373500  | H | -1.75224500 | -1.30086100 | -1.63659500 |
| H                | 0.90144000  | 1.23302400  | 2.61999800  | H | -2.85446900 | -0.31248500 | -2.64387500 |
| O                | 0.02504600  | -1.62317600 | 0.33094500  | C | 1.08260100  | -2.18708200 | 0.67561700  |
| Li               | -0.03087800 | 0.37665700  | 0.62604400  | C | 1.55736300  | -2.04392300 | 2.09821800  |
| C                | 1.59505000  | 1.82813600  | -0.85053700 | H | 0.77984300  | -2.41308600 | 2.77509300  |
| O                | 0.67663400  | 1.09590300  | -1.26812600 | H | 2.50790200  | -2.52192400 | 2.33940600  |
| C                | -3.04542700 | 0.24129300  | 0.57269300  | H | 1.62972400  | -0.93805700 | 2.23042000  |
| O                | -1.95833200 | 0.80166000  | 0.76991800  | N | 1.82902600  | -2.83769800 | -0.26350300 |
| N                | -3.34354000 | -0.35394100 | -0.61289400 | C | 1.42275400  | -2.72328900 | -1.66239600 |
| N                | 1.37397700  | 3.13300100  | -0.51974400 | H | 0.99617500  | -1.73447400 | -1.83391300 |
| C                | -4.09263800 | 0.23411100  | 1.67750000  | H | 2.30547300  | -2.85622600 | -2.29603900 |
| H                | -5.05686000 | 0.63236800  | 1.34386100  | H | 0.68065600  | -3.48714700 | -1.93347500 |
| H                | -4.25806400 | -0.77926000 | 2.06124700  | C | 2.94076600  | -3.73753300 | 0.00252900  |
| H                | -3.71163000 | 0.85420900  | 2.48932600  | H | 3.88219100  | -3.33434600 | -0.39404900 |
| C                | 3.00267100  | 1.28921700  | -0.71609400 | H | 3.05699400  | -3.90952400 | 1.07064500  |
| H                | 3.77024600  | 1.98906600  | -1.06122200 | H | 2.75687700  | -4.70781400 | -0.477439   |
